# Supplementary material for: Hepatic Tumor Stiffness Measured by Shear Wave Elastography Is Prognostic for HCC Progression Following Treatment With Anti-PD-1 Antibodies Plus Lenvatinib: A Retrospective Analysis of Two Independent Cohorts
Source: Front Immunol. 2022 Jun 9;13:868809. doi: 10.3389/fimmu.2022.868809 (PMC9218245; doi:10.3389/fimmu.2022.868809)
Supplement: Supplementary file 1 [file Table_1.xlsx]

## Sheet: Sheet1
Table S1. KEGG analysis
##Databases: KEGG PATHWAY, Gene Ontology
##Statistical test method: hypergeometric test / Fisher's exact test
##FDR correction method: Benjamini and Hochberg
#Term	Database	ID	Input number	Background number	P Value	Corrected P Value	Input	Hyperlink
Metabolic pathways	KEGG PATHWAY	hsa01100	53	1433	3.03477e-12	1.04767e-09	SPHK1|GNMT|DEGS2|AMPD3|PRDX6|ALDH7A1|CKMT1A|CKMT1B|FH|GAL3ST1|PTGDS|PYCR1|CTH|GAD1|B3GNT5|PAPSS2|GCNT3|ASS1|CHIT1|IMPDH1|PFKP|PDE7A|LPCAT4|LPCAT1|IL4I1|MGAM2|LDHB|PKM|AACS|MOCS2|ENTPD2|CA9|BCAT1|XYLT1|ENO2|PIGS|PLA2G2D|UGT1A10|HGD|GALNT7|NAT8L|CYP3A7-CYP3A51P|MTHFD2|GALNT14|AK8|GALNT12|GALK1|ADCY3|PFKFB3|G6PD|MTMR2|PDE6B|FUT4	http://www.genome.jp/kegg-bin/show_pathway?hsa01100/hsa:100861540%09red/hsa:2539%09red/hsa:9060%09red/hsa:2571%09red/hsa:123099%09red/hsa:339983%09red/hsa:9588%09red/hsa:79623%09red/hsa:26279%09red/hsa:272%09red/hsa:3081%09red/hsa:10797%09red/hsa:1159%09red/hsa:2026%09red/hsa:3614%09red/hsa:84002%09red/hsa:5150%09red/hsa:2584%09red/hsa:1118%09red/hsa:768%09red/hsa:8877%09red/hsa:8898%09red/hsa:22…
Central carbon metabolism in cancer	KEGG PATHWAY	hsa05230	9	69	4.51982e-07	5.20115e-05	SLC16A3|G6PD|EGFR|SLC2A1|PFKP|SLC1A5|MYC|LDHB|PKM	http://www.genome.jp/kegg-bin/show_pathway?hsa05230/hsa:2539%09red/hsa:3945%09red/hsa:6513%09red/hsa:6510%09red/hsa:9123%09red/hsa:5214%09red/hsa:1956%09red/hsa:5315%09red/hsa:4609%09red
Axon guidance	KEGG PATHWAY	hsa04360	13	181	8.25223e-07	8.84127e-05	SEMA3A|EPHB2|NFATC4|SRC|EFNA5|SEMA3E|FES|CFL1|CXCR4|SEMA4A|SEMA4D|EFNB2|BMP7	http://www.genome.jp/kegg-bin/show_pathway?hsa04360/hsa:1948%09red/hsa:655%09red/hsa:2242%09red/hsa:1072%09red/hsa:10507%09red/hsa:6714%09red/hsa:2048%09red/hsa:1946%09red/hsa:9723%09red/hsa:64218%09red/hsa:10371%09red/hsa:4776%09red/hsa:7852%09red
PI3K-Akt signaling pathway	KEGG PATHWAY	hsa04151	17	354	3.58971e-06	0.000278831	YWHAZ|CREB3L3|ITGB4|ITGB6|COMP|ITGA2|IL2RG|EGFR|PPP2R2C|LPAR2|INSR|CREB3L1|ITGA3|LAMB1|MYC|MYB|EFNA5	http://www.genome.jp/kegg-bin/show_pathway?hsa04151/hsa:5522%09red/hsa:3675%09red/hsa:7534%09red/hsa:1311%09red/hsa:3561%09red/hsa:3912%09red/hsa:3673%09red/hsa:4602%09red/hsa:3694%09red/hsa:4609%09red/hsa:1956%09red/hsa:1946%09red/hsa:3691%09red/hsa:9170%09red/hsa:90993%09red/hsa:3643%09red/hsa:84699%09red
Pathways in cancer	KEGG PATHWAY	hsa05200	21	530	4.85062e-06	0.000363033	GLI1|JAG2|ZBTB16|ADCY3|RASSF1|WNT10B|FZD7|EGFR|SLC2A1|MECOM|LPAR2|IL2RG|RUNX1|ITGA3|CXCR4|MMP9|LAMB1|MYC|ITGA2|FH|RALGDS	http://www.genome.jp/kegg-bin/show_pathway?hsa05200/hsa:5900%09red/hsa:3675%09red/hsa:4318%09red/hsa:7480%09red/hsa:3673%09red/hsa:6513%09red/hsa:11186%09red/hsa:3912%09red/hsa:2122%09red/hsa:3714%09red/hsa:7704%09red/hsa:2735%09red/hsa:4609%09red/hsa:1956%09red/hsa:2271%09red/hsa:9170%09red/hsa:109%09red/hsa:3561%09red/hsa:861%09red/hsa:7852%09red/hsa:8324%09red
Estrogen signaling pathway	KEGG PATHWAY	hsa04915	10	138	1.41898e-05	0.000787281	SRC|HSPA6|ADCY3|EGFR|PRKCD|CREB3L3|HSPA1A|CREB3L1|MMP9|ITPR3	http://www.genome.jp/kegg-bin/show_pathway?hsa04915/hsa:4318%09red/hsa:5580%09red/hsa:3710%09red/hsa:3310%09red/hsa:1956%09red/hsa:3303%09red/hsa:6714%09red/hsa:109%09red/hsa:90993%09red/hsa:84699%09red
Insulin secretion	KEGG PATHWAY	hsa04911	8	86	1.95261e-05	0.000978509	STX1A|ADCY3|ATP1B3|SLC2A1|CREB3L3|KCNN4|CREB3L1|ITPR3	http://www.genome.jp/kegg-bin/show_pathway?hsa04911/hsa:6513%09red/hsa:3710%09red/hsa:3783%09red/hsa:483%09red/hsa:109%09red/hsa:90993%09red/hsa:6804%09red/hsa:84699%09red
Human papillomavirus infection	KEGG PATHWAY	hsa05165	15	330	2.45412e-05	0.00119023	DLG3|ITGA3|ITGB4|ITGB6|COMP|WNT10B|FZD7|EGFR|PPP2R2C|CREB3L3|CREB3L1|LAMB1|LFNG|ITGA2|PKM	http://www.genome.jp/kegg-bin/show_pathway?hsa05165/hsa:3955%09red/hsa:3691%09red/hsa:8324%09red/hsa:3673%09red/hsa:1311%09red/hsa:1741%09red/hsa:3912%09red/hsa:5522%09red/hsa:3694%09red/hsa:1956%09red/hsa:7480%09red/hsa:5315%09red/hsa:90993%09red/hsa:3675%09red/hsa:84699%09red
Purine metabolism	KEGG PATHWAY	hsa00230	9	130	5.30347e-05	0.00219705	PDE6B|AK8|ENTPD2|ADCY3|AMPD3|IMPDH1|PDE7A|PAPSS2|PKM	http://www.genome.jp/kegg-bin/show_pathway?hsa00230/hsa:954%09red/hsa:5150%09red/hsa:3614%09red/hsa:5158%09red/hsa:9060%09red/hsa:5315%09red/hsa:109%09red/hsa:158067%09red/hsa:272%09red
Biosynthesis of amino acids	KEGG PATHWAY	hsa01230	7	75	6.34989e-05	0.00252937	ASS1|BCAT1|PFKP|ENO2|PYCR1|CTH|PKM	http://www.genome.jp/kegg-bin/show_pathway?hsa01230/hsa:5831%09red/hsa:2026%09red/hsa:586%09red/hsa:5214%09red/hsa:5315%09red/hsa:445%09red/hsa:1491%09red
Regulation of actin cytoskeleton	KEGG PATHWAY	hsa04810	11	214	0.000105324	0.00348129	ITGAX|SRC|ITGB4|ITGB6|ARPC1B|ITGA2|ITGA3|EGFR|CFL1|CXCR4|LPAR2	http://www.genome.jp/kegg-bin/show_pathway?hsa04810/hsa:3675%09red/hsa:3673%09red/hsa:10095%09red/hsa:1072%09red/hsa:3687%09red/hsa:3694%09red/hsa:1956%09red/hsa:3691%09red/hsa:6714%09red/hsa:9170%09red/hsa:7852%09red
ECM-receptor interaction	KEGG PATHWAY	hsa04512	7	86	0.000141185	0.00425886	ITGB4|ITGB6|COMP|ITGA2|ITGA3|NPNT|LAMB1	http://www.genome.jp/kegg-bin/show_pathway?hsa04512/hsa:3675%09red/hsa:3673%09red/hsa:1311%09red/hsa:3912%09red/hsa:3694%09red/hsa:3691%09red/hsa:255743%09red
Transcriptional misregulation in cancer	KEGG PATHWAY	hsa05202	10	186	0.00015224	0.00442066	MLF1|SPINT1|ZBTB16|HMGA2|SCG2|HOXA11|HOXA10|RUNX1|MMP9|MYC	http://www.genome.jp/kegg-bin/show_pathway?hsa05202/hsa:4318%09red/hsa:3206%09red/hsa:861%09red/hsa:4221%09red/hsa:3207%09red/hsa:7704%09red/hsa:6692%09red/hsa:8091%09red/hsa:4609%09red/hsa:4291%09red
Longevity regulating pathway - multiple species	KEGG PATHWAY	hsa04213	6	62	0.000177245	0.00505231	HSPA6|SOD1|ADCY3|INSR|HSPA1A|EIF4EBP2	http://www.genome.jp/kegg-bin/show_pathway?hsa04213/hsa:1979%09red/hsa:3310%09red/hsa:6647%09red/hsa:109%09red/hsa:3303%09red/hsa:3643%09red
Cushing syndrome	KEGG PATHWAY	hsa04934	9	155	0.000187831	0.00525759	FZD7|WNT10B|ADCY3|EGFR|SCG2|CREB3L3|CREB3L1|FH|ITPR3	http://www.genome.jp/kegg-bin/show_pathway?hsa04934/hsa:84699%09red/hsa:4221%09red/hsa:1956%09red/hsa:2271%09red/hsa:7480%09red/hsa:109%09red/hsa:90993%09red/hsa:3710%09red/hsa:8324%09red
Bladder cancer	KEGG PATHWAY	hsa05219	5	41	0.000232107	0.00606015	RASSF1|SRC|MYC|EGFR|MMP9	http://www.genome.jp/kegg-bin/show_pathway?hsa05219/hsa:6714%09red/hsa:4609%09red/hsa:11186%09red/hsa:4318%09red/hsa:1956%09red
Proteoglycans in cancer	KEGG PATHWAY	hsa05205	10	203	0.000297343	0.00710609	SRC|ITPR3|FZD7|PLAUR|WNT10B|EGFR|MMP9|FLNA|MYC|ITGA2	http://www.genome.jp/kegg-bin/show_pathway?hsa05205/hsa:4318%09red/hsa:3673%09red/hsa:3710%09red/hsa:5329%09red/hsa:2316%09red/hsa:1956%09red/hsa:7480%09red/hsa:6714%09red/hsa:4609%09red/hsa:8324%09red
Glucagon signaling pathway	KEGG PATHWAY	hsa04922	7	106	0.000468084	0.0098266	SLC2A1|PFKP|CREB3L3|CREB3L1|ITPR3|LDHB|PKM	http://www.genome.jp/kegg-bin/show_pathway?hsa04922/hsa:3945%09red/hsa:6513%09red/hsa:3710%09red/hsa:5214%09red/hsa:5315%09red/hsa:90993%09red/hsa:84699%09red
HIF-1 signaling pathway	KEGG PATHWAY	hsa04066	7	109	0.000547916	0.0111266	PFKFB3|EGFR|INSR|SLC2A1|PFKP|ENO2|LDHB	http://www.genome.jp/kegg-bin/show_pathway?hsa04066/hsa:2026%09red/hsa:3945%09red/hsa:6513%09red/hsa:5214%09red/hsa:1956%09red/hsa:5209%09red/hsa:3643%09red
Phagosome	KEGG PATHWAY	hsa04145	8	152	0.000783158	0.0149281	RAB7B|OLR1|TUBA1C|COMP|ITGA2|TUBB3|DYNC2H1|MBL2	http://www.genome.jp/kegg-bin/show_pathway?hsa04145/hsa:4153%09red/hsa:3673%09red/hsa:1311%09red/hsa:84790%09red/hsa:4973%09red/hsa:79659%09red/hsa:10381%09red/hsa:338382%09red
Mucin type O-glycan biosynthesis	KEGG PATHWAY	hsa00512	4	31	0.000825584	0.015546	GALNT14|GALNT7|GALNT12|GCNT3	http://www.genome.jp/kegg-bin/show_pathway?hsa00512/hsa:51809%09red/hsa:79623%09red/hsa:9245%09red/hsa:79695%09red
Hippo signaling pathway	KEGG PATHWAY	hsa04390	8	154	0.000849026	0.0158911	YWHAZ|BMP7|DLG3|FZD7|RASSF1|WNT10B|PPP2R2C|MYC	http://www.genome.jp/kegg-bin/show_pathway?hsa04390/hsa:5522%09red/hsa:655%09red/hsa:1741%09red/hsa:11186%09red/hsa:7534%09red/hsa:7480%09red/hsa:4609%09red/hsa:8324%09red
AMPK signaling pathway	KEGG PATHWAY	hsa04152	7	120	0.000937554	0.017035	PFKFB3|PFKFB4|PPP2R2C|PFKP|CREB3L3|INSR|CREB3L1	http://www.genome.jp/kegg-bin/show_pathway?hsa04152/hsa:5522%09red/hsa:5210%09red/hsa:5214%09red/hsa:5209%09red/hsa:90993%09red/hsa:3643%09red/hsa:84699%09red
Gap junction	KEGG PATHWAY	hsa04540	6	88	0.00101293	0.0180872	SRC|ADCY3|TUBA1C|EGFR|TUBB3|ITPR3	http://www.genome.jp/kegg-bin/show_pathway?hsa04540/hsa:3710%09red/hsa:84790%09red/hsa:10381%09red/hsa:1956%09red/hsa:6714%09red/hsa:109%09red
Focal adhesion	KEGG PATHWAY	hsa04510	9	199	0.0010517	0.0185579	SRC|ITGB4|ITGB6|COMP|ITGA2|ITGA3|EGFR|LAMB1|FLNA	http://www.genome.jp/kegg-bin/show_pathway?hsa04510/hsa:3675%09red/hsa:3673%09red/hsa:1311%09red/hsa:3912%09red/hsa:3694%09red/hsa:2316%09red/hsa:1956%09red/hsa:3691%09red/hsa:6714%09red
Cytokine-cytokine receptor interaction	KEGG PATHWAY	hsa04060	11	294	0.00135626	0.021029	BMP7|CCR6|TNFSF15|IL2RG|CCL18|RELT|LTB|TNFRSF11A|IL27|CXCR4|TNFRSF18	http://www.genome.jp/kegg-bin/show_pathway?hsa04060/hsa:655%09red/hsa:1235%09red/hsa:8792%09red/hsa:3561%09red/hsa:246778%09red/hsa:6362%09red/hsa:84957%09red/hsa:4050%09red/hsa:8784%09red/hsa:9966%09red/hsa:7852%09red
Alanine, aspartate and glutamate metabolism	KEGG PATHWAY	hsa00250	4	36	0.00137396	0.021029	ASS1|IL4I1|NAT8L|GAD1	http://www.genome.jp/kegg-bin/show_pathway?hsa00250/hsa:259307%09red/hsa:445%09red/hsa:2571%09red/hsa:339983%09red
cGMP-PKG signaling pathway	KEGG PATHWAY	hsa04022	8	167	0.00139331	0.0212207	NFATC4|ADCY3|ATP1B3|CREB3L3|INSR|CREB3L1|ITPR3|ADRB2	http://www.genome.jp/kegg-bin/show_pathway?hsa04022/hsa:154%09red/hsa:4776%09red/hsa:3710%09red/hsa:483%09red/hsa:109%09red/hsa:90993%09red/hsa:3643%09red/hsa:84699%09red
Dilated cardiomyopathy (DCM)	KEGG PATHWAY	hsa05414	6	96	0.00154515	0.0222146	ITGB4|ITGB6|ITGA2|ITGA3|TNNI3|ADCY3	http://www.genome.jp/kegg-bin/show_pathway?hsa05414/hsa:3675%09red/hsa:3673%09red/hsa:7137%09red/hsa:3694%09red/hsa:3691%09red/hsa:109%09red
Tight junction	KEGG PATHWAY	hsa04530	8	170	0.00155152	0.0222146	SRC|DLG3|CGN|TUBA1C|PPP2R2C|RUNX1|CLDN4|YBX3	http://www.genome.jp/kegg-bin/show_pathway?hsa04530/hsa:5522%09red/hsa:57530%09red/hsa:1741%09red/hsa:1364%09red/hsa:861%09red/hsa:84790%09red/hsa:6714%09red/hsa:8531%09red
Endocrine resistance	KEGG PATHWAY	hsa01522	6	98	0.0017064	0.0237183	SRC|BIK|ADCY3|EGFR|MMP9|JAG2	http://www.genome.jp/kegg-bin/show_pathway?hsa01522/hsa:4318%09red/hsa:638%09red/hsa:3714%09red/hsa:1956%09red/hsa:6714%09red/hsa:109%09red
Pyruvate metabolism	KEGG PATHWAY	hsa00620	4	39	0.00180316	0.0243584	FH|ALDH7A1|LDHB|PKM	http://www.genome.jp/kegg-bin/show_pathway?hsa00620/hsa:5315%09red/hsa:501%09red/hsa:2271%09red/hsa:3945%09red
Glycolysis / Gluconeogenesis	KEGG PATHWAY	hsa00010	5	68	0.00194774	0.0258244	ENO2|ALDH7A1|PFKP|LDHB|PKM	http://www.genome.jp/kegg-bin/show_pathway?hsa00010/hsa:5315%09red/hsa:5214%09red/hsa:2026%09red/hsa:501%09red/hsa:3945%09red
Human cytomegalovirus infection	KEGG PATHWAY	hsa05163	9	225	0.00235629	0.0287098	SRC|NFATC4|ADCY3|EGFR|CREB3L3|CREB3L1|CXCR4|ITPR3|MYC	http://www.genome.jp/kegg-bin/show_pathway?hsa05163/hsa:4776%09red/hsa:3710%09red/hsa:1956%09red/hsa:4609%09red/hsa:6714%09red/hsa:109%09red/hsa:90993%09red/hsa:7852%09red/hsa:84699%09red
Parathyroid hormone synthesis, secretion and action	KEGG PATHWAY	hsa04928	6	106	0.00248209	0.0301244	ADCY3|EGFR|PTHLH|CREB3L3|CREB3L1|ITPR3	http://www.genome.jp/kegg-bin/show_pathway?hsa04928/hsa:3710%09red/hsa:5744%09red/hsa:1956%09red/hsa:109%09red/hsa:90993%09red/hsa:84699%09red
Vasopressin-regulated water reabsorption	KEGG PATHWAY	hsa04962	4	44	0.00271124	0.0325244	CREB3L3|CREB3L1|DYNC2H1|ADCY3	http://www.genome.jp/kegg-bin/show_pathway?hsa04962/hsa:109%09red/hsa:90993%09red/hsa:84699%09red/hsa:79659%09red
Thyroid hormone synthesis	KEGG PATHWAY	hsa04918	5	74	0.00275511	0.0329235	CREB3L3|ITPR3|CREB3L1|ATP1B3|ADCY3	http://www.genome.jp/kegg-bin/show_pathway?hsa04918/hsa:3710%09red/hsa:109%09red/hsa:90993%09red/hsa:483%09red/hsa:84699%09red
Adrenergic signaling in cardiomyocytes	KEGG PATHWAY	hsa04261	7	149	0.0030326	0.034711	ADCY3|ATP1B3|PPP2R2C|CREB3L3|ADRB2|CREB3L1|TNNI3	http://www.genome.jp/kegg-bin/show_pathway?hsa04261/hsa:5522%09red/hsa:7137%09red/hsa:154%09red/hsa:483%09red/hsa:109%09red/hsa:90993%09red/hsa:84699%09red
Calcium signaling pathway	KEGG PATHWAY	hsa04020	8	193	0.00329092	0.0371815	ORAI2|SPHK1|ADCY3|EGFR|ADRB2|PTAFR|CXCR4|ITPR3	http://www.genome.jp/kegg-bin/show_pathway?hsa04020/hsa:3710%09red/hsa:154%09red/hsa:80228%09red/hsa:8877%09red/hsa:1956%09red/hsa:109%09red/hsa:5724%09red/hsa:7852%09red
Sphingolipid metabolism	KEGG PATHWAY	hsa00600	4	47	0.00338444	0.0375552	GAL3ST1|SPHK1|DEGS2|SGPP2	http://www.genome.jp/kegg-bin/show_pathway?hsa00600/hsa:8877%09red/hsa:130367%09red/hsa:123099%09red/hsa:9514%09red
Valine, leucine and isoleucine degradation	KEGG PATHWAY	hsa00280	4	48	0.00363193	0.0391226	AACS|IL4I1|BCAT1|ALDH7A1	http://www.genome.jp/kegg-bin/show_pathway?hsa00280/hsa:259307%09red/hsa:586%09red/hsa:65985%09red/hsa:501%09red
Neuroactive ligand-receptor interaction	KEGG PATHWAY	hsa04080	11	338	0.00382668	0.0391226	UTS2|GABRP|PTH2R|NPB|CHRNA4|CHRNA5|ADRB2|GAL|PTAFR|LPAR2|GPR35	http://www.genome.jp/kegg-bin/show_pathway?hsa04080/hsa:51083%09red/hsa:154%09red/hsa:5746%09red/hsa:2859%09red/hsa:2568%09red/hsa:1138%09red/hsa:10911%09red/hsa:9170%09red/hsa:256933%09red/hsa:5724%09red/hsa:1137%09red
Cysteine and methionine metabolism	KEGG PATHWAY	hsa00270	4	49	0.0038914	0.0391226	IL4I1|CTH|BCAT1|LDHB	http://www.genome.jp/kegg-bin/show_pathway?hsa00270/hsa:259307%09red/hsa:586%09red/hsa:1491%09red/hsa:3945%09red
Glycosaminoglycan biosynthesis - heparan sulfate / heparin	KEGG PATHWAY	hsa00534	3	24	0.0041576	0.0406739	HS3ST2|HS3ST1|XYLT1	http://www.genome.jp/kegg-bin/show_pathway?hsa00534/hsa:64131%09red/hsa:9957%09red/hsa:9956%09red
Arginine and proline metabolism	KEGG PATHWAY	hsa00330	4	50	0.00416314	0.0406739	PYCR1|CKMT1A|CKMT1B|ALDH7A1	http://www.genome.jp/kegg-bin/show_pathway?hsa00330/hsa:5831%09red/hsa:1159%09red/hsa:501%09red/hsa:548596%09red
Hepatitis B	KEGG PATHWAY	hsa05161	7	163	0.0048521	0.0439447	YWHAZ|SRC|NFATC4|CREB3L3|CREB3L1|MMP9|MYC	http://www.genome.jp/kegg-bin/show_pathway?hsa05161/hsa:4318%09red/hsa:7534%09red/hsa:4776%09red/hsa:6714%09red/hsa:4609%09red/hsa:90993%09red/hsa:84699%09red
Mineral absorption	KEGG PATHWAY	hsa04978	4	53	0.00505454	0.0442379	HEPH|SLC39A4|ATP1B3|SLC26A9	http://www.genome.jp/kegg-bin/show_pathway?hsa04978/hsa:9843%09red/hsa:115019%09red/hsa:483%09red/hsa:55630%09red
Pathogenic Escherichia coli infection	KEGG PATHWAY	hsa05130	4	55	0.00571483	0.0487802	TUBA1C|YWHAZ|TUBB3|ARPC1B	http://www.genome.jp/kegg-bin/show_pathway?hsa05130/hsa:10095%09red/hsa:84790%09red/hsa:10381%09red/hsa:7534%09red
Salivary secretion	KEGG PATHWAY	hsa04970	5	90	0.00605541	0.0490571	ITPR3|ADRB2|KCNN4|ATP1B3|ADCY3	http://www.genome.jp/kegg-bin/show_pathway?hsa04970/hsa:154%09red/hsa:109%09red/hsa:3710%09red/hsa:483%09red/hsa:3783%09red
Hypertrophic cardiomyopathy (HCM)	KEGG PATHWAY	hsa05410	5	90	0.00605541	0.0490571	ITGB4|ITGA2|ITGA3|TNNI3|ITGB6	http://www.genome.jp/kegg-bin/show_pathway?hsa05410/hsa:7137%09red/hsa:3675%09red/hsa:3694%09red/hsa:3691%09red/hsa:3673%09red
Relaxin signaling pathway	KEGG PATHWAY	hsa04926	6	130	0.0064082	0.0507916	SRC|ADCY3|EGFR|CREB3L3|CREB3L1|MMP9	http://www.genome.jp/kegg-bin/show_pathway?hsa04926/hsa:4318%09red/hsa:1956%09red/hsa:6714%09red/hsa:109%09red/hsa:90993%09red/hsa:84699%09red
Human T-cell leukemia virus 1 infection	KEGG PATHWAY	hsa05166	8	219	0.00676625	0.0530877	NFATC4|IL2RG|ADCY3|SLC2A1|CREB3L3|CREB3L1|MSX1|MYC	http://www.genome.jp/kegg-bin/show_pathway?hsa05166/hsa:3561%09red/hsa:4776%09red/hsa:4609%09red/hsa:6513%09red/hsa:109%09red/hsa:90993%09red/hsa:4487%09red/hsa:84699%09red
GnRH signaling pathway	KEGG PATHWAY	hsa04912	5	93	0.0068925	0.0538066	SRC|ITPR3|EGFR|PRKCD|ADCY3	http://www.genome.jp/kegg-bin/show_pathway?hsa04912/hsa:6714%09red/hsa:109%09red/hsa:3710%09red/hsa:5580%09red/hsa:1956%09red
Galactose metabolism	KEGG PATHWAY	hsa00052	3	31	0.00799094	0.0588337	PFKP|GALK1|MGAM2	http://www.genome.jp/kegg-bin/show_pathway?hsa00052/hsa:93432%09red/hsa:5214%09red/hsa:2584%09red
Prostate cancer	KEGG PATHWAY	hsa05215	5	97	0.00813009	0.0590191	CREB3L3|CREB3L1|EGFR|SPINT1|MMP9	http://www.genome.jp/kegg-bin/show_pathway?hsa05215/hsa:6692%09red/hsa:4318%09red/hsa:90993%09red/hsa:1956%09red/hsa:84699%09red
Aldosterone synthesis and secretion	KEGG PATHWAY	hsa04925	5	98	0.00846202	0.0612855	CREB3L3|ITPR3|CREB3L1|ATP1B3|ADCY3	http://www.genome.jp/kegg-bin/show_pathway?hsa04925/hsa:3710%09red/hsa:109%09red/hsa:90993%09red/hsa:483%09red/hsa:84699%09red
Ras signaling pathway	KEGG PATHWAY	hsa04014	8	232	0.00930359	0.0641012	RALGDS|RASSF1|RIN1|EFNA5|EGFR|INSR|PLA2G2D|RASAL1	http://www.genome.jp/kegg-bin/show_pathway?hsa04014/hsa:9610%09red/hsa:5900%09red/hsa:11186%09red/hsa:8437%09red/hsa:26279%09red/hsa:1956%09red/hsa:1946%09red/hsa:3643%09red
Fructose and mannose metabolism	KEGG PATHWAY	hsa00051	3	33	0.00936657	0.0641012	PFKFB3|PFKFB4|PFKP	http://www.genome.jp/kegg-bin/show_pathway?hsa00051/hsa:5210%09red/hsa:5209%09red/hsa:5214%09red
Melanogenesis	KEGG PATHWAY	hsa04916	5	101	0.00951387	0.0649661	CREB3L3|WNT10B|CREB3L1|FZD7|ADCY3	http://www.genome.jp/kegg-bin/show_pathway?hsa04916/hsa:109%09red/hsa:90993%09red/hsa:84699%09red/hsa:8324%09red/hsa:7480%09red
Cortisol synthesis and secretion	KEGG PATHWAY	hsa04927	4	65	0.00987961	0.0670486	CREB3L3|ITPR3|CREB3L1|ADCY3	http://www.genome.jp/kegg-bin/show_pathway?hsa04927/hsa:109%09red/hsa:90993%09red/hsa:3710%09red/hsa:84699%09red
C-type lectin receptor signaling pathway	KEGG PATHWAY	hsa04625	5	104	0.0106523	0.0682409	SRC|LSP1|NFATC4|PRKCD|ITPR3	http://www.genome.jp/kegg-bin/show_pathway?hsa04625/hsa:6714%09red/hsa:4046%09red/hsa:4776%09red/hsa:3710%09red/hsa:5580%09red
Phospholipase D signaling pathway	KEGG PATHWAY	hsa04072	6	148	0.0114385	0.0720837	SPHK1|RALGDS|ADCY3|EGFR|INSR|LPAR2	http://www.genome.jp/kegg-bin/show_pathway?hsa04072/hsa:5900%09red/hsa:8877%09red/hsa:1956%09red/hsa:9170%09red/hsa:109%09red/hsa:3643%09red
Endocytosis	KEGG PATHWAY	hsa04144	8	244	0.0122203	0.0750364	SRC|HSPA6|IL2RG|ARPC1B|EGFR|PSD3|HSPA1A|CXCR4	http://www.genome.jp/kegg-bin/show_pathway?hsa04144/hsa:10095%09red/hsa:3561%09red/hsa:3310%09red/hsa:1956%09red/hsa:23362%09red/hsa:6714%09red/hsa:3303%09red/hsa:7852%09red
Insulin resistance	KEGG PATHWAY	hsa04931	5	108	0.0123105	0.075441	CREB3L3|INSR|CREB3L1|PRKCD|SLC2A1	http://www.genome.jp/kegg-bin/show_pathway?hsa04931/hsa:6513%09red/hsa:90993%09red/hsa:5580%09red/hsa:3643%09red/hsa:84699%09red
MAPK signaling pathway	KEGG PATHWAY	hsa04010	9	295	0.0124107	0.0756943	HSPA6|MECOM|EFNA5|EGFR|INSR|HSPA1A|DUSP4|FLNA|MYC	http://www.genome.jp/kegg-bin/show_pathway?hsa04010/hsa:2122%09red/hsa:3310%09red/hsa:2316%09red/hsa:1956%09red/hsa:1946%09red/hsa:4609%09red/hsa:3303%09red/hsa:3643%09red/hsa:1846%09red
Bile secretion	KEGG PATHWAY	hsa04976	4	72	0.0137301	0.079489	NR0B2|ATP1B3|SLC2A1|ADCY3	http://www.genome.jp/kegg-bin/show_pathway?hsa04976/hsa:109%09red/hsa:8431%09red/hsa:483%09red/hsa:6513%09red
Cholinergic synapse	KEGG PATHWAY	hsa04725	5	112	0.0141353	0.0807322	CHRNA4|CREB3L3|ITPR3|CREB3L1|ADCY3	http://www.genome.jp/kegg-bin/show_pathway?hsa04725/hsa:109%09red/hsa:1137%09red/hsa:90993%09red/hsa:3710%09red/hsa:84699%09red
Glycine, serine and threonine metabolism	KEGG PATHWAY	hsa00260	3	40	0.0152152	0.0845684	GNMT|CTH|ALDH7A1	http://www.genome.jp/kegg-bin/show_pathway?hsa00260/hsa:501%09red/hsa:27232%09red/hsa:1491%09red
Wnt signaling pathway	KEGG PATHWAY	hsa04310	6	160	0.0160411	0.0869803	NFATC4|SFRP4|FZD7|WNT10B|GPC4|MYC	http://www.genome.jp/kegg-bin/show_pathway?hsa04310/hsa:4776%09red/hsa:6424%09red/hsa:2239%09red/hsa:7480%09red/hsa:4609%09red/hsa:8324%09red
Carbon metabolism	KEGG PATHWAY	hsa01200	5	117	0.0166609	0.0892506	FH|ENO2|G6PD|PFKP|PKM	http://www.genome.jp/kegg-bin/show_pathway?hsa01200/hsa:5315%09red/hsa:2539%09red/hsa:5214%09red/hsa:2026%09red/hsa:2271%09red
Arrhythmogenic right ventricular cardiomyopathy (ARVC)	KEGG PATHWAY	hsa05412	4	77	0.0169914	0.0907082	ITGA2|ITGA3|ITGB4|ITGB6	http://www.genome.jp/kegg-bin/show_pathway?hsa05412/hsa:3675%09red/hsa:3694%09red/hsa:3691%09red/hsa:3673%09red
Rap1 signaling pathway	KEGG PATHWAY	hsa04015	7	210	0.0170922	0.0909777	SRC|RALGDS|ADCY3|EFNA5|EGFR|INSR|LPAR2	http://www.genome.jp/kegg-bin/show_pathway?hsa04015/hsa:5900%09red/hsa:1956%09red/hsa:1946%09red/hsa:9170%09red/hsa:6714%09red/hsa:109%09red/hsa:3643%09red
Thyroid hormone signaling pathway	KEGG PATHWAY	hsa04919	5	119	0.0177497	0.0920674	SRC|MYC|ATP1B3|SLC2A1|PFKP	http://www.genome.jp/kegg-bin/show_pathway?hsa04919/hsa:6714%09red/hsa:6513%09red/hsa:5214%09red/hsa:483%09red/hsa:4609%09red
cAMP signaling pathway	KEGG PATHWAY	hsa04024	7	214	0.0186887	0.0958183	ADCY3|ATP1B3|CREB3L3|ADRB2|CREB3L1|TNNI3|GLI1	http://www.genome.jp/kegg-bin/show_pathway?hsa04024/hsa:7137%09red/hsa:154%09red/hsa:2735%09red/hsa:483%09red/hsa:109%09red/hsa:90993%09red/hsa:84699%09red
ABC transporters	KEGG PATHWAY	hsa02010	3	45	0.0204031	0.10159	ABCA12|ABCA3|ABCB9	http://www.genome.jp/kegg-bin/show_pathway?hsa02010/hsa:21%09red/hsa:23457%09red/hsa:26154%09red
Salmonella infection	KEGG PATHWAY	hsa05132	4	83	0.0214949	0.104532	FLNA|RAB7B|DYNC2H1|ARPC1B	http://www.genome.jp/kegg-bin/show_pathway?hsa05132/hsa:10095%09red/hsa:2316%09red/hsa:338382%09red/hsa:79659%09red
Type II diabetes mellitus	KEGG PATHWAY	hsa04930	3	46	0.021543	0.104532	INSR|PRKCD|PKM	http://www.genome.jp/kegg-bin/show_pathway?hsa04930/hsa:5315%09red/hsa:5580%09red/hsa:3643%09red
Selenocompound metabolism	KEGG PATHWAY	hsa00450	2	17	0.021835	0.104532	PAPSS2|CTH	http://www.genome.jp/kegg-bin/show_pathway?hsa00450/hsa:9060%09red/hsa:1491%09red
Ether lipid metabolism	KEGG PATHWAY	hsa00565	3	47	0.0227171	0.108421	GAL3ST1|PLA2G2D|LPCAT1	http://www.genome.jp/kegg-bin/show_pathway?hsa00565/hsa:26279%09red/hsa:79888%09red/hsa:9514%09red
Oocyte meiosis	KEGG PATHWAY	hsa04114	5	128	0.0232287	0.110354	YWHAZ|ITPR3|SMC1B|CPEB3|ADCY3	http://www.genome.jp/kegg-bin/show_pathway?hsa04114/hsa:27127%09red/hsa:109%09red/hsa:3710%09red/hsa:22849%09red/hsa:7534%09red
Dopaminergic synapse	KEGG PATHWAY	hsa04728	5	131	0.0252723	0.116673	ARNTL|CREB3L3|CREB3L1|PPP2R2C|ITPR3	http://www.genome.jp/kegg-bin/show_pathway?hsa04728/hsa:406%09red/hsa:5522%09red/hsa:90993%09red/hsa:3710%09red/hsa:84699%09red
GABAergic synapse	KEGG PATHWAY	hsa04727	4	89	0.0266643	0.118495	SRC|GABRP|GAD1|ADCY3	http://www.genome.jp/kegg-bin/show_pathway?hsa04727/hsa:6714%09red/hsa:109%09red/hsa:2571%09red/hsa:2568%09red
Longevity regulating pathway	KEGG PATHWAY	hsa04211	4	89	0.0266643	0.118495	CREB3L3|INSR|CREB3L1|ADCY3	http://www.genome.jp/kegg-bin/show_pathway?hsa04211/hsa:109%09red/hsa:90993%09red/hsa:3643%09red/hsa:84699%09red
Protein digestion and absorption	KEGG PATHWAY	hsa04974	4	90	0.0275919	0.121946	SLC1A5|KCNN4|ATP1B3|COL11A1	http://www.genome.jp/kegg-bin/show_pathway?hsa04974/hsa:6510%09red/hsa:3783%09red/hsa:483%09red/hsa:1301%09red
One carbon pool by folate	KEGG PATHWAY	hsa00670	2	20	0.0288035	0.125164	ALDH1L1|MTHFD2	http://www.genome.jp/kegg-bin/show_pathway?hsa00670/hsa:10840%09red/hsa:10797%09red
Small cell lung cancer	KEGG PATHWAY	hsa05222	4	93	0.0304892	0.131205	LAMB1|ITGA2|ITGA3|MYC	http://www.genome.jp/kegg-bin/show_pathway?hsa05222/hsa:3675%09red/hsa:4609%09red/hsa:3912%09red/hsa:3673%09red
TGF-beta signaling pathway	KEGG PATHWAY	hsa04350	4	94	0.0314934	0.134011	BMP7|NBL1|MYC|FST	http://www.genome.jp/kegg-bin/show_pathway?hsa04350/hsa:100532736%09red/hsa:4609%09red/hsa:10468%09red/hsa:655%09red
Fc gamma R-mediated phagocytosis	KEGG PATHWAY	hsa04666	4	94	0.0314934	0.134011	ARPC1B|SPHK1|PRKCD|CFL1	http://www.genome.jp/kegg-bin/show_pathway?hsa04666/hsa:10095%09red/hsa:8877%09red/hsa:1072%09red/hsa:5580%09red
Chemokine signaling pathway	KEGG PATHWAY	hsa04062	6	190	0.0327772	0.13818	SRC|ADCY3|CCL18|PRKCD|CCR6|CXCR4	http://www.genome.jp/kegg-bin/show_pathway?hsa04062/hsa:5580%09red/hsa:1235%09red/hsa:6362%09red/hsa:6714%09red/hsa:109%09red/hsa:7852%09red
Regulation of lipolysis in adipocytes	KEGG PATHWAY	hsa04923	3	55	0.033337	0.139218	INSR|ADRB2|ADCY3	http://www.genome.jp/kegg-bin/show_pathway?hsa04923/hsa:109%09red/hsa:154%09red/hsa:3643%09red
Legionellosis	KEGG PATHWAY	hsa05134	3	55	0.033337	0.139218	HSPA1A|SAR1B|HSPA6	http://www.genome.jp/kegg-bin/show_pathway?hsa05134/hsa:51128%09red/hsa:3310%09red/hsa:3303%09red
Other types of O-glycan biosynthesis	KEGG PATHWAY	hsa00514	2	22	0.0338748	0.139773	LFNG|GXYLT2	http://www.genome.jp/kegg-bin/show_pathway?hsa00514/hsa:727936%09red/hsa:3955%09red
Pancreatic secretion	KEGG PATHWAY	hsa04972	4	98	0.0357026	0.145575	ITPR3|ATP1B3|PLA2G2D|ADCY3	http://www.genome.jp/kegg-bin/show_pathway?hsa04972/hsa:109%09red/hsa:3710%09red/hsa:483%09red/hsa:26279%09red
Inflammatory mediator regulation of TRP channels	KEGG PATHWAY	hsa04750	4	100	0.0379232	0.150482	SRC|ITPR3|PRKCD|ADCY3	http://www.genome.jp/kegg-bin/show_pathway?hsa04750/hsa:6714%09red/hsa:109%09red/hsa:3710%09red/hsa:5580%09red
Viral protein interaction with cytokine and cytokine receptor	KEGG PATHWAY	hsa04061	4	100	0.0379232	0.150482	CCL18|CXCR4|CCR6|IL2RG	http://www.genome.jp/kegg-bin/show_pathway?hsa04061/hsa:3561%09red/hsa:1235%09red/hsa:7852%09red/hsa:6362%09red
Breast cancer	KEGG PATHWAY	hsa05224	5	147	0.0380967	0.150978	JAG2|WNT10B|EGFR|MYC|FZD7	http://www.genome.jp/kegg-bin/show_pathway?hsa05224/hsa:4609%09red/hsa:3714%09red/hsa:1956%09red/hsa:8324%09red/hsa:7480%09red
Gastric cancer	KEGG PATHWAY	hsa05226	5	149	0.0399339	0.155287	WNT10B|EGFR|MYC|CDH17|FZD7	http://www.genome.jp/kegg-bin/show_pathway?hsa05226/hsa:4609%09red/hsa:8324%09red/hsa:1015%09red/hsa:1956%09red/hsa:7480%09red
Oxytocin signaling pathway	KEGG PATHWAY	hsa04921	5	153	0.0437673	0.166012	EGFR|ITPR3|NFATC4|SRC|ADCY3	http://www.genome.jp/kegg-bin/show_pathway?hsa04921/hsa:6714%09red/hsa:109%09red/hsa:4776%09red/hsa:3710%09red/hsa:1956%09red
Hepatitis C	KEGG PATHWAY	hsa05160	5	155	0.0457639	0.170082	YWHAZ|EGFR|MYC|CLDN4|PPP2R2C	http://www.genome.jp/kegg-bin/show_pathway?hsa05160/hsa:1364%09red/hsa:4609%09red/hsa:5522%09red/hsa:1956%09red/hsa:7534%09red
Basal cell carcinoma	KEGG PATHWAY	hsa05217	3	63	0.046103	0.170933	WNT10B|GLI1|FZD7	http://www.genome.jp/kegg-bin/show_pathway?hsa05217/hsa:2735%09red/hsa:8324%09red/hsa:7480%09red
Glycosphingolipid biosynthesis - lacto and neolacto series	KEGG PATHWAY	hsa00601	2	27	0.0479066	0.173682	B3GNT5|FUT4	http://www.genome.jp/kegg-bin/show_pathway?hsa00601/hsa:84002%09red/hsa:2526%09red
Ascorbate and aldarate metabolism	KEGG PATHWAY	hsa00053	2	27	0.0479066	0.173682	UGT1A10|ALDH7A1	http://www.genome.jp/kegg-bin/show_pathway?hsa00053/hsa:501%09red/hsa:54575%09red
Mitophagy - animal	KEGG PATHWAY	hsa04137	3	65	0.0496203	0.178896	SRC|ATG9B|RAB7B	http://www.genome.jp/kegg-bin/show_pathway?hsa04137/hsa:6714%09red/hsa:285973%09red/hsa:338382%09red
Butanoate metabolism	KEGG PATHWAY	hsa00650	2	28	0.0509272	0.182084	AACS|GAD1	http://www.genome.jp/kegg-bin/show_pathway?hsa00650/hsa:65985%09red/hsa:2571%09red
Acute myeloid leukemia	KEGG PATHWAY	hsa05221	3	66	0.0514267	0.183027	MYC|RUNX1|ZBTB16	http://www.genome.jp/kegg-bin/show_pathway?hsa05221/hsa:7704%09red/hsa:4609%09red/hsa:861%09red
Shigellosis	KEGG PATHWAY	hsa05131	3	68	0.0551338	0.190971	ARPC1B|RIPK2|SRC	http://www.genome.jp/kegg-bin/show_pathway?hsa05131/hsa:10095%09red/hsa:6714%09red/hsa:8767%09red
Amphetamine addiction	KEGG PATHWAY	hsa05031	3	68	0.0551338	0.190971	STX1A|CREB3L3|CREB3L1	http://www.genome.jp/kegg-bin/show_pathway?hsa05031/hsa:90993%09red/hsa:6804%09red/hsa:84699%09red
Pentose phosphate pathway	KEGG PATHWAY	hsa00030	2	30	0.0571656	0.19518	G6PD|PFKP	http://www.genome.jp/kegg-bin/show_pathway?hsa00030/hsa:2539%09red/hsa:5214%09red
Sphingolipid signaling pathway	KEGG PATHWAY	hsa04071	4	119	0.062873	0.199902	SPHK1|DEGS2|PPP2R2C|SGPP2	http://www.genome.jp/kegg-bin/show_pathway?hsa04071/hsa:5522%09red/hsa:8877%09red/hsa:130367%09red/hsa:123099%09red
Adherens junction	KEGG PATHWAY	hsa04520	3	72	0.0629176	0.199902	SRC|INSR|EGFR	http://www.genome.jp/kegg-bin/show_pathway?hsa04520/hsa:6714%09red/hsa:1956%09red/hsa:3643%09red
beta-Alanine metabolism	KEGG PATHWAY	hsa00410	2	33	0.0669866	0.199902	GAD1|ALDH7A1	http://www.genome.jp/kegg-bin/show_pathway?hsa00410/hsa:2571%09red/hsa:501%09red
Lysosome	KEGG PATHWAY	hsa04142	4	123	0.0690015	0.199902	AP1M2|ABCB9|AP3B2|SLC11A1	http://www.genome.jp/kegg-bin/show_pathway?hsa04142/hsa:6556%09red/hsa:8120%09red/hsa:10053%09red/hsa:23457%09red
Gastric acid secretion	KEGG PATHWAY	hsa04971	3	75	0.0690704	0.199902	ITPR3|ATP1B3|ADCY3	http://www.genome.jp/kegg-bin/show_pathway?hsa04971/hsa:109%09red/hsa:3710%09red/hsa:483%09red
Phenylalanine, tyrosine and tryptophan biosynthesis	KEGG PATHWAY	hsa00400	1	5	0.0704898	0.199902	IL4I1	http://www.genome.jp/kegg-bin/show_pathway?hsa00400/hsa:259307%09red
Platelet activation	KEGG PATHWAY	hsa04611	4	124	0.07058	0.199902	SRC|ITGA2|ITPR3|ADCY3	http://www.genome.jp/kegg-bin/show_pathway?hsa04611/hsa:6714%09red/hsa:109%09red/hsa:3710%09red/hsa:3673%09red
Chronic myeloid leukemia	KEGG PATHWAY	hsa05220	3	76	0.0711797	0.201416	MECOM|MYC|RUNX1	http://www.genome.jp/kegg-bin/show_pathway?hsa05220/hsa:4609%09red/hsa:861%09red/hsa:2122%09red
Prion diseases	KEGG PATHWAY	hsa05020	2	35	0.0738202	0.204827	HSPA1A|SOD1	http://www.genome.jp/kegg-bin/show_pathway?hsa05020/hsa:6647%09red/hsa:3303%09red
Tuberculosis	KEGG PATHWAY	hsa05152	5	179	0.0738992	0.204827	ITGAX|SRC|SPHK1|RIPK2|LSP1	http://www.genome.jp/kegg-bin/show_pathway?hsa05152/hsa:6714%09red/hsa:8877%09red/hsa:4046%09red/hsa:8767%09red/hsa:3687%09red
Synaptic vesicle cycle	KEGG PATHWAY	hsa04721	3	78	0.0754841	0.204827	STX1A|SLC1A7|UNC13A	http://www.genome.jp/kegg-bin/show_pathway?hsa04721/hsa:6512%09red/hsa:23025%09red/hsa:6804%09red
Tyrosine metabolism	KEGG PATHWAY	hsa00350	2	36	0.0773173	0.204827	IL4I1|HGD	http://www.genome.jp/kegg-bin/show_pathway?hsa00350/hsa:259307%09red/hsa:3081%09red
Complement and coagulation cascades	KEGG PATHWAY	hsa04610	3	79	0.0776785	0.204827	ITGAX|PLAUR|MBL2	http://www.genome.jp/kegg-bin/show_pathway?hsa04610/hsa:4153%09red/hsa:5329%09red/hsa:3687%09red
MicroRNAs in cancer	KEGG PATHWAY	hsa05206	7	299	0.0802413	0.204827	RASSF1|HMGA2|EGFR|VIM|MMP9|MYC|SLC7A1	http://www.genome.jp/kegg-bin/show_pathway?hsa05206/hsa:4318%09red/hsa:11186%09red/hsa:6541%09red/hsa:7431%09red/hsa:8091%09red/hsa:1956%09red/hsa:4609%09red
Aldosterone-regulated sodium reabsorption	KEGG PATHWAY	hsa04960	2	37	0.0808656	0.204827	INSR|ATP1B3	http://www.genome.jp/kegg-bin/show_pathway?hsa04960/hsa:3643%09red/hsa:483%09red
Vascular smooth muscle contraction	KEGG PATHWAY	hsa04270	4	132	0.0838637	0.209457	ITPR3|PRKCD|PLA2G2D|ADCY3	http://www.genome.jp/kegg-bin/show_pathway?hsa04270/hsa:109%09red/hsa:3710%09red/hsa:5580%09red/hsa:26279%09red
Chemical carcinogenesis	KEGG PATHWAY	hsa05204	3	82	0.0844271	0.209942	SULT1A1|CYP3A7-CYP3A51P|UGT1A10	http://www.genome.jp/kegg-bin/show_pathway?hsa05204/hsa:100861540%09red/hsa:6817%09red/hsa:54575%09red
ErbB signaling pathway	KEGG PATHWAY	hsa04012	3	85	0.0914162	0.210457	SRC|MYC|EGFR	http://www.genome.jp/kegg-bin/show_pathway?hsa04012/hsa:6714%09red/hsa:4609%09red/hsa:1956%09red
Nicotine addiction	KEGG PATHWAY	hsa05033	2	40	0.0918002	0.210457	CHRNA4|GABRP	http://www.genome.jp/kegg-bin/show_pathway?hsa05033/hsa:1137%09red/hsa:2568%09red
Colorectal cancer	KEGG PATHWAY	hsa05210	3	86	0.0937979	0.212413	MYC|EGFR|RALGDS	http://www.genome.jp/kegg-bin/show_pathway?hsa05210/hsa:5900%09red/hsa:4609%09red/hsa:1956%09red
Porphyrin and chlorophyll metabolism	KEGG PATHWAY	hsa00860	2	42	0.0993147	0.216412	HEPH|UGT1A10	http://www.genome.jp/kegg-bin/show_pathway?hsa00860/hsa:9843%09red/hsa:54575%09red
Tryptophan metabolism	KEGG PATHWAY	hsa00380	2	42	0.0993147	0.216412	IL4I1|ALDH7A1	http://www.genome.jp/kegg-bin/show_pathway?hsa00380/hsa:259307%09red/hsa:501%09red
Sulfur relay system	KEGG PATHWAY	hsa04122	1	8	0.103853	0.216412	MOCS2	http://www.genome.jp/kegg-bin/show_pathway?hsa04122/hsa:4338%09red
Morphine addiction	KEGG PATHWAY	hsa05032	3	91	0.106079	0.220166	PDE7A|GABRP|ADCY3	http://www.genome.jp/kegg-bin/show_pathway?hsa05032/hsa:109%09red/hsa:2568%09red/hsa:5150%09red
Viral carcinogenesis	KEGG PATHWAY	hsa05203	5	201	0.106312	0.220361	YWHAZ|CREB3L3|CREB3L1|SRC|PKM	http://www.genome.jp/kegg-bin/show_pathway?hsa05203/hsa:5315%09red/hsa:6714%09red/hsa:90993%09red/hsa:84699%09red/hsa:7534%09red
Carbohydrate digestion and absorption	KEGG PATHWAY	hsa04973	2	44	0.106994	0.220361	ATP1B3|MGAM2	http://www.genome.jp/kegg-bin/show_pathway?hsa04973/hsa:93432%09red/hsa:483%09red
Glycerophospholipid metabolism	KEGG PATHWAY	hsa00564	3	97	0.121592	0.225523	LPCAT4|PLA2G2D|LPCAT1	http://www.genome.jp/kegg-bin/show_pathway?hsa00564/hsa:26279%09red/hsa:129642%09red/hsa:79888%09red
Amino sugar and nucleotide sugar metabolism	KEGG PATHWAY	hsa00520	2	48	0.122799	0.225523	CHIT1|GALK1	http://www.genome.jp/kegg-bin/show_pathway?hsa00520/hsa:2584%09red/hsa:1118%09red
Notch signaling pathway	KEGG PATHWAY	hsa04330	2	48	0.122799	0.225523	JAG2|LFNG	http://www.genome.jp/kegg-bin/show_pathway?hsa04330/hsa:3955%09red/hsa:3714%09red
Human immunodeficiency virus 1 infection	KEGG PATHWAY	hsa05170	5	212	0.124744	0.225523	AP1M2|ITPR3|NFATC4|CFL1|CXCR4	http://www.genome.jp/kegg-bin/show_pathway?hsa05170/hsa:1072%09red/hsa:3710%09red/hsa:10053%09red/hsa:7852%09red/hsa:4776%09red
Sulfur metabolism	KEGG PATHWAY	hsa00920	1	10	0.125428	0.225523	PAPSS2	http://www.genome.jp/kegg-bin/show_pathway?hsa00920/hsa:9060%09red
Cocaine addiction	KEGG PATHWAY	hsa05030	2	49	0.126834	0.227525	CREB3L3|CREB3L1	http://www.genome.jp/kegg-bin/show_pathway?hsa05030/hsa:90993%09red/hsa:84699%09red
Ovarian steroidogenesis	KEGG PATHWAY	hsa04913	2	49	0.126834	0.227525	INSR|ADCY3	http://www.genome.jp/kegg-bin/show_pathway?hsa04913/hsa:109%09red/hsa:3643%09red
NF-kappa B signaling pathway	KEGG PATHWAY	hsa04064	3	100	0.129641	0.232427	LTB|CARD11|TNFRSF11A	http://www.genome.jp/kegg-bin/show_pathway?hsa04064/hsa:8792%09red/hsa:84433%09red/hsa:4050%09red
Amyotrophic lateral sclerosis (ALS)	KEGG PATHWAY	hsa05014	2	51	0.134997	0.233747	TOMM40L|SOD1	http://www.genome.jp/kegg-bin/show_pathway?hsa05014/hsa:84134%09red/hsa:6647%09red
Taurine and hypotaurine metabolism	KEGG PATHWAY	hsa00430	1	11	0.13602	0.233747	GAD1	http://www.genome.jp/kegg-bin/show_pathway?hsa00430/hsa:2571%09red
Cellular senescence	KEGG PATHWAY	hsa04218	4	160	0.138822	0.238418	ITPR3|MYC|MYBL2|NFATC4	http://www.genome.jp/kegg-bin/show_pathway?hsa04218/hsa:4609%09red/hsa:4776%09red/hsa:3710%09red/hsa:4605%09red
Protein processing in endoplasmic reticulum	KEGG PATHWAY	hsa04141	4	165	0.149867	0.2443	HSPA1A|SAR1B|HSPA6|XBP1	http://www.genome.jp/kegg-bin/show_pathway?hsa04141/hsa:7494%09red/hsa:51128%09red/hsa:3310%09red/hsa:3303%09red
Hepatocellular carcinoma	KEGG PATHWAY	hsa05225	4	168	0.156651	0.246958	WNT10B|EGFR|MYC|FZD7	http://www.genome.jp/kegg-bin/show_pathway?hsa05225/hsa:4609%09red/hsa:8324%09red/hsa:1956%09red/hsa:7480%09red
TNF signaling pathway	KEGG PATHWAY	hsa04668	3	112	0.163565	0.254652	CREB3L3|CREB3L1|MMP9	http://www.genome.jp/kegg-bin/show_pathway?hsa04668/hsa:4318%09red/hsa:90993%09red/hsa:84699%09red
Leukocyte transendothelial migration	KEGG PATHWAY	hsa04670	3	112	0.163565	0.254652	CXCR4|CLDN4|MMP9	http://www.genome.jp/kegg-bin/show_pathway?hsa04670/hsa:1364%09red/hsa:4318%09red/hsa:7852%09red
Endometrial cancer	KEGG PATHWAY	hsa05213	2	58	0.164396	0.254652	MYC|EGFR	http://www.genome.jp/kegg-bin/show_pathway?hsa05213/hsa:4609%09red/hsa:1956%09red
Toxoplasmosis	KEGG PATHWAY	hsa05145	3	113	0.166504	0.254652	LAMB1|HSPA1A|HSPA6	http://www.genome.jp/kegg-bin/show_pathway?hsa05145/hsa:3310%09red/hsa:3912%09red/hsa:3303%09red
VEGF signaling pathway	KEGG PATHWAY	hsa04370	2	59	0.168685	0.256285	SRC|SPHK1	http://www.genome.jp/kegg-bin/show_pathway?hsa04370/hsa:6714%09red/hsa:8877%09red
Glutamatergic synapse	KEGG PATHWAY	hsa04724	3	114	0.169458	0.257208	ITPR3|SLC1A7|ADCY3	http://www.genome.jp/kegg-bin/show_pathway?hsa04724/hsa:6512%09red/hsa:109%09red/hsa:3710%09red
Steroid hormone biosynthesis	KEGG PATHWAY	hsa00140	2	60	0.172992	0.260731	CYP3A7-CYP3A51P|UGT1A10	http://www.genome.jp/kegg-bin/show_pathway?hsa00140/hsa:100861540%09red/hsa:54575%09red
Glycerolipid metabolism	KEGG PATHWAY	hsa00561	2	61	0.177318	0.260731	LPCAT4|ALDH7A1	http://www.genome.jp/kegg-bin/show_pathway?hsa00561/hsa:501%09red/hsa:129642%09red
Arachidonic acid metabolism	KEGG PATHWAY	hsa00590	2	63	0.186017	0.266284	PTGDS|PLA2G2D	http://www.genome.jp/kegg-bin/show_pathway?hsa00590/hsa:26279%09red/hsa:5730%09red
Thiamine metabolism	KEGG PATHWAY	hsa00730	1	16	0.187093	0.266284	AK8	http://www.genome.jp/kegg-bin/show_pathway?hsa00730/hsa:158067%09red
Nitrogen metabolism	KEGG PATHWAY	hsa00910	1	17	0.19694	0.273533	CA9	http://www.genome.jp/kegg-bin/show_pathway?hsa00910/hsa:768%09red
Phenylalanine metabolism	KEGG PATHWAY	hsa00360	1	17	0.19694	0.273533	IL4I1	http://www.genome.jp/kegg-bin/show_pathway?hsa00360/hsa:259307%09red
Non-small cell lung cancer	KEGG PATHWAY	hsa05223	2	66	0.199174	0.276019	RASSF1|EGFR	http://www.genome.jp/kegg-bin/show_pathway?hsa05223/hsa:11186%09red/hsa:1956%09red
Kaposi sarcoma-associated herpesvirus infection	KEGG PATHWAY	hsa05167	4	186	0.199547	0.276413	SRC|MYC|NFATC4|ITPR3	http://www.genome.jp/kegg-bin/show_pathway?hsa05167/hsa:6714%09red/hsa:4609%09red/hsa:4776%09red/hsa:3710%09red
Cell cycle	KEGG PATHWAY	hsa04110	3	124	0.199771	0.276599	YWHAZ|MYC|SMC1B	http://www.genome.jp/kegg-bin/show_pathway?hsa04110/hsa:27127%09red/hsa:4609%09red/hsa:7534%09red
Retinol metabolism	KEGG PATHWAY	hsa00830	2	67	0.203585	0.281014	CYP3A7-CYP3A51P|UGT1A10	http://www.genome.jp/kegg-bin/show_pathway?hsa00830/hsa:100861540%09red/hsa:54575%09red
2-Oxocarboxylic acid metabolism	KEGG PATHWAY	hsa01210	1	18	0.206668	0.281014	BCAT1	http://www.genome.jp/kegg-bin/show_pathway?hsa01210/hsa:586%09red
Staphylococcus aureus infection	KEGG PATHWAY	hsa05150	2	68	0.208006	0.282709	PTAFR|MBL2	http://www.genome.jp/kegg-bin/show_pathway?hsa05150/hsa:4153%09red/hsa:5724%09red
Autophagy - animal	KEGG PATHWAY	hsa04140	3	128	0.212239	0.286435	RAB7B|ATG9B|PRKCD	http://www.genome.jp/kegg-bin/show_pathway?hsa04140/hsa:285973%09red/hsa:5580%09red/hsa:338382%09red
Renal cell carcinoma	KEGG PATHWAY	hsa05211	2	69	0.212437	0.286435	FH|SLC2A1	http://www.genome.jp/kegg-bin/show_pathway?hsa05211/hsa:6513%09red/hsa:2271%09red
Renin secretion	KEGG PATHWAY	hsa04924	2	69	0.212437	0.286435	ITPR3|ADRB2	http://www.genome.jp/kegg-bin/show_pathway?hsa04924/hsa:154%09red/hsa:3710%09red
Pantothenate and CoA biosynthesis	KEGG PATHWAY	hsa00770	1	19	0.216279	0.286435	BCAT1	http://www.genome.jp/kegg-bin/show_pathway?hsa00770/hsa:586%09red
Prolactin signaling pathway	KEGG PATHWAY	hsa04917	2	70	0.216877	0.286861	SRC|TNFRSF11A	http://www.genome.jp/kegg-bin/show_pathway?hsa04917/hsa:8792%09red/hsa:6714%09red
Epithelial cell signaling in Helicobacter pylori infection	KEGG PATHWAY	hsa05120	2	70	0.216877	0.286861	SRC|EGFR	http://www.genome.jp/kegg-bin/show_pathway?hsa05120/hsa:6714%09red/hsa:1956%09red
Glycosaminoglycan biosynthesis - chondroitin sulfate / dermatan sulfate	KEGG PATHWAY	hsa00532	1	20	0.225773	0.293515	XYLT1	http://www.genome.jp/kegg-bin/show_pathway?hsa00532/hsa:64131%09red
Bacterial invasion of epithelial cells	KEGG PATHWAY	hsa05100	2	74	0.23471	0.300295	ARPC1B|SRC	http://www.genome.jp/kegg-bin/show_pathway?hsa05100/hsa:10095%09red/hsa:6714%09red
Arginine biosynthesis	KEGG PATHWAY	hsa00220	1	21	0.235152	0.300295	ASS1	http://www.genome.jp/kegg-bin/show_pathway?hsa00220/hsa:445%09red
Pancreatic cancer	KEGG PATHWAY	hsa05212	2	75	0.239183	0.304941	EGFR|RALGDS	http://www.genome.jp/kegg-bin/show_pathway?hsa05212/hsa:5900%09red/hsa:1956%09red
Apelin signaling pathway	KEGG PATHWAY	hsa04371	3	137	0.240854	0.30682	ITPR3|SPHK1|ADCY3	http://www.genome.jp/kegg-bin/show_pathway?hsa04371/hsa:109%09red/hsa:3710%09red/hsa:8877%09red
PPAR signaling pathway	KEGG PATHWAY	hsa03320	2	76	0.243659	0.308076	FABP5|OLR1	http://www.genome.jp/kegg-bin/show_pathway?hsa03320/hsa:2171%09red/hsa:4973%09red
Measles	KEGG PATHWAY	hsa05162	3	138	0.244074	0.308076	HSPA1A|HSPA6|IL2RG	http://www.genome.jp/kegg-bin/show_pathway?hsa05162/hsa:3561%09red/hsa:3310%09red/hsa:3303%09red
Fluid shear stress and atherosclerosis	KEGG PATHWAY	hsa05418	3	139	0.247301	0.311583	SRC|ASS1|MMP9	http://www.genome.jp/kegg-bin/show_pathway?hsa05418/hsa:6714%09red/hsa:4318%09red/hsa:445%09red
Antigen processing and presentation	KEGG PATHWAY	hsa04612	2	77	0.248139	0.31226	HSPA1A|HSPA6	http://www.genome.jp/kegg-bin/show_pathway?hsa04612/hsa:3310%09red/hsa:3303%09red
Signaling pathways regulating pluripotency of stem cells	KEGG PATHWAY	hsa04550	3	140	0.250534	0.315146	WNT10B|MYC|FZD7	http://www.genome.jp/kegg-bin/show_pathway?hsa04550/hsa:4609%09red/hsa:8324%09red/hsa:7480%09red
Mannose type O-glycan biosynthesis	KEGG PATHWAY	hsa00515	1	23	0.253572	0.315266	FUT4	http://www.genome.jp/kegg-bin/show_pathway?hsa00515/hsa:2526%09red
Histidine metabolism	KEGG PATHWAY	hsa00340	1	23	0.253572	0.315266	ALDH7A1	http://www.genome.jp/kegg-bin/show_pathway?hsa00340/hsa:501%09red
Proximal tubule bicarbonate reclamation	KEGG PATHWAY	hsa04964	1	23	0.253572	0.315266	ATP1B3	http://www.genome.jp/kegg-bin/show_pathway?hsa04964/hsa:483%09red
RNA degradation	KEGG PATHWAY	hsa03018	2	79	0.257107	0.31864	ENO2|PFKP	http://www.genome.jp/kegg-bin/show_pathway?hsa03018/hsa:5214%09red/hsa:2026%09red
Drug metabolism - other enzymes	KEGG PATHWAY	hsa00983	2	79	0.257107	0.31864	IMPDH1|UGT1A10	http://www.genome.jp/kegg-bin/show_pathway?hsa00983/hsa:3614%09red/hsa:54575%09red
EGFR tyrosine kinase inhibitor resistance	KEGG PATHWAY	hsa01521	2	79	0.257107	0.31864	SRC|EGFR	http://www.genome.jp/kegg-bin/show_pathway?hsa01521/hsa:6714%09red/hsa:1956%09red
Vitamin digestion and absorption	KEGG PATHWAY	hsa04977	1	24	0.262616	0.323147	MMACHC	http://www.genome.jp/kegg-bin/show_pathway?hsa04977/hsa:25974%09red
Cell adhesion molecules (CAMs)	KEGG PATHWAY	hsa04514	3	146	0.270055	0.330865	NRCAM|VCAN|CLDN4	http://www.genome.jp/kegg-bin/show_pathway?hsa04514/hsa:1364%09red/hsa:1462%09red/hsa:4897%09red
alpha-Linolenic acid metabolism	KEGG PATHWAY	hsa00592	1	25	0.27155	0.330865	PLA2G2D	http://www.genome.jp/kegg-bin/show_pathway?hsa00592/hsa:26279%09red
Glycosylphosphatidylinositol (GPI)-anchor biosynthesis	KEGG PATHWAY	hsa00563	1	25	0.27155	0.330865	PIGS	http://www.genome.jp/kegg-bin/show_pathway?hsa00563/hsa:94005%09red
Taste transduction	KEGG PATHWAY	hsa04742	2	83	0.27505	0.334998	ITPR3|ENTPD2	http://www.genome.jp/kegg-bin/show_pathway?hsa04742/hsa:954%09red/hsa:3710%09red
Retrograde endocannabinoid signaling	KEGG PATHWAY	hsa04723	3	148	0.2766	0.336754	ITPR3|GABRP|ADCY3	http://www.genome.jp/kegg-bin/show_pathway?hsa04723/hsa:109%09red/hsa:3710%09red/hsa:2568%09red
Folate biosynthesis	KEGG PATHWAY	hsa00790	1	26	0.280376	0.337254	MOCS2	http://www.genome.jp/kegg-bin/show_pathway?hsa00790/hsa:4338%09red
Cardiac muscle contraction	KEGG PATHWAY	hsa04260	2	86	0.288494	0.343882	ATP1B3|TNNI3	http://www.genome.jp/kegg-bin/show_pathway?hsa04260/hsa:7137%09red/hsa:483%09red
mTOR signaling pathway	KEGG PATHWAY	hsa04150	3	153	0.293027	0.348425	WNT10B|INSR|FZD7	http://www.genome.jp/kegg-bin/show_pathway?hsa04150/hsa:8324%09red/hsa:3643%09red/hsa:7480%09red
Phototransduction	KEGG PATHWAY	hsa04744	1	28	0.297709	0.35117	PDE6B	http://www.genome.jp/kegg-bin/show_pathway?hsa04744/hsa:5158%09red
Hippo signaling pathway - multiple species	KEGG PATHWAY	hsa04392	1	29	0.306219	0.357812	RASSF1	http://www.genome.jp/kegg-bin/show_pathway?hsa04392/hsa:11186%09red
Linoleic acid metabolism	KEGG PATHWAY	hsa00591	1	29	0.306219	0.357812	PLA2G2D	http://www.genome.jp/kegg-bin/show_pathway?hsa00591/hsa:26279%09red
Rheumatoid arthritis	KEGG PATHWAY	hsa05323	2	91	0.310829	0.36279	LTB|TNFRSF11A	http://www.genome.jp/kegg-bin/show_pathway?hsa05323/hsa:8792%09red/hsa:4050%09red
Citrate cycle (TCA cycle)	KEGG PATHWAY	hsa00020	1	30	0.314626	0.365436	FH	http://www.genome.jp/kegg-bin/show_pathway?hsa00020/hsa:2271%09red
Th1 and Th2 cell differentiation	KEGG PATHWAY	hsa04658	2	92	0.31528	0.36606	JAG2|IL2RG	http://www.genome.jp/kegg-bin/show_pathway?hsa04658/hsa:3561%09red/hsa:3714%09red
IL-17 signaling pathway	KEGG PATHWAY	hsa04657	2	93	0.319725	0.371082	MAPK15|MMP9	http://www.genome.jp/kegg-bin/show_pathway?hsa04657/hsa:225689%09red/hsa:4318%09red
Jak-STAT signaling pathway	KEGG PATHWAY	hsa04630	3	162	0.322729	0.371335	MYC|EGFR|IL2RG	http://www.genome.jp/kegg-bin/show_pathway?hsa04630/hsa:3561%09red/hsa:1956%09red/hsa:4609%09red
Circadian rhythm	KEGG PATHWAY	hsa04710	1	31	0.322931	0.371335	ARNTL	http://www.genome.jp/kegg-bin/show_pathway?hsa04710/hsa:406%09red
Amoebiasis	KEGG PATHWAY	hsa05146	2	95	0.328593	0.377147	LAMB1|RAB7B	http://www.genome.jp/kegg-bin/show_pathway?hsa05146/hsa:3912%09red/hsa:338382%09red
Autophagy - other	KEGG PATHWAY	hsa04136	1	32	0.331136	0.377278	ATG9B	http://www.genome.jp/kegg-bin/show_pathway?hsa04136/hsa:285973%09red
Circadian entrainment	KEGG PATHWAY	hsa04713	2	97	0.337428	0.384026	ITPR3|ADCY3	http://www.genome.jp/kegg-bin/show_pathway?hsa04713/hsa:109%09red/hsa:3710%09red
Hematopoietic cell lineage	KEGG PATHWAY	hsa04640	2	97	0.337428	0.384026	ITGA2|ITGA3	http://www.genome.jp/kegg-bin/show_pathway?hsa04640/hsa:3675%09red/hsa:3673%09red
Phosphatidylinositol signaling system	KEGG PATHWAY	hsa04070	2	99	0.346229	0.389354	ITPR3|MTMR2	http://www.genome.jp/kegg-bin/show_pathway?hsa04070/hsa:3710%09red/hsa:8898%09red
Progesterone-mediated oocyte maturation	KEGG PATHWAY	hsa04914	2	99	0.346229	0.389354	CPEB3|ADCY3	http://www.genome.jp/kegg-bin/show_pathway?hsa04914/hsa:109%09red/hsa:22849%09red
Choline metabolism in cancer	KEGG PATHWAY	hsa05231	2	99	0.346229	0.389354	EGFR|RALGDS	http://www.genome.jp/kegg-bin/show_pathway?hsa05231/hsa:5900%09red/hsa:1956%09red
Propanoate metabolism	KEGG PATHWAY	hsa00640	1	34	0.347249	0.389354	LDHB	http://www.genome.jp/kegg-bin/show_pathway?hsa00640/hsa:3945%09red
SNARE interactions in vesicular transport	KEGG PATHWAY	hsa04130	1	34	0.347249	0.389354	STX1A	http://www.genome.jp/kegg-bin/show_pathway?hsa04130/hsa:6804%09red
Pentose and glucuronate interconversions	KEGG PATHWAY	hsa00040	1	34	0.347249	0.389354	UGT1A10	http://www.genome.jp/kegg-bin/show_pathway?hsa00040/hsa:54575%09red
Starch and sucrose metabolism	KEGG PATHWAY	hsa00500	1	36	0.362974	0.404215	MGAM2	http://www.genome.jp/kegg-bin/show_pathway?hsa00500/hsa:93432%09red
Thyroid cancer	KEGG PATHWAY	hsa05216	1	37	0.370695	0.411339	MYC	http://www.genome.jp/kegg-bin/show_pathway?hsa05216/hsa:4609%09red
Primary immunodeficiency	KEGG PATHWAY	hsa05340	1	37	0.370695	0.411339	IL2RG	http://www.genome.jp/kegg-bin/show_pathway?hsa05340/hsa:3561%09red
NOD-like receptor signaling pathway	KEGG PATHWAY	hsa04621	3	178	0.375452	0.416321	ITPR3|RIPK2|PRKCD	http://www.genome.jp/kegg-bin/show_pathway?hsa04621/hsa:5580%09red/hsa:3710%09red/hsa:8767%09red
Th17 cell differentiation	KEGG PATHWAY	hsa04659	2	107	0.381011	0.421431	RUNX1|IL2RG	http://www.genome.jp/kegg-bin/show_pathway?hsa04659/hsa:3561%09red/hsa:861%09red
Alcoholism	KEGG PATHWAY	hsa05034	3	180	0.381999	0.422374	CREB3L3|CREB3L1|PKIA	http://www.genome.jp/kegg-bin/show_pathway?hsa05034/hsa:5569%09red/hsa:90993%09red/hsa:84699%09red
Herpes simplex virus 1 infection	KEGG PATHWAY	hsa05168	7	492	0.400513	0.436783	SRC|ZNF43|ZNF554|ZNF267|ZNF93|ZNF107|ZNF761	http://www.genome.jp/kegg-bin/show_pathway?hsa05168/hsa:115196%09red/hsa:388561%09red/hsa:81931%09red/hsa:51427%09red/hsa:7594%09red/hsa:6714%09red/hsa:10308%09red
Fat digestion and absorption	KEGG PATHWAY	hsa04975	1	41	0.400654	0.436783	PLA2G2D	http://www.genome.jp/kegg-bin/show_pathway?hsa04975/hsa:26279%09red
Type I diabetes mellitus	KEGG PATHWAY	hsa04940	1	43	0.415095	0.448904	GAD1	http://www.genome.jp/kegg-bin/show_pathway?hsa04940/hsa:2571%09red
Fatty acid degradation	KEGG PATHWAY	hsa00071	1	44	0.422185	0.454988	ALDH7A1	http://www.genome.jp/kegg-bin/show_pathway?hsa00071/hsa:501%09red
Huntington disease	KEGG PATHWAY	hsa05016	3	193	0.424109	0.456744	CREB3L3|CREB3L1|SOD1	http://www.genome.jp/kegg-bin/show_pathway?hsa05016/hsa:90993%09red/hsa:6647%09red/hsa:84699%09red
Neurotrophin signaling pathway	KEGG PATHWAY	hsa04722	2	119	0.43162	0.463708	RIPK2|PRKCD	http://www.genome.jp/kegg-bin/show_pathway?hsa04722/hsa:5580%09red/hsa:8767%09red
Hedgehog signaling pathway	KEGG PATHWAY	hsa04340	1	47	0.442945	0.473582	GLI1	http://www.genome.jp/kegg-bin/show_pathway?hsa04340/hsa:2735%09red
Malaria	KEGG PATHWAY	hsa05144	1	49	0.45637	0.486095	COMP	http://www.genome.jp/kegg-bin/show_pathway?hsa05144/hsa:1311%09red
Intestinal immune network for IgA production	KEGG PATHWAY	hsa04672	1	49	0.45637	0.486095	CXCR4	http://www.genome.jp/kegg-bin/show_pathway?hsa04672/hsa:7852%09red
Vibrio cholerae infection	KEGG PATHWAY	hsa05110	1	50	0.46296	0.492103	ADCY3	http://www.genome.jp/kegg-bin/show_pathway?hsa05110/hsa:109%09red
Endocrine and other factor-regulated calcium reabsorption	KEGG PATHWAY	hsa04961	1	50	0.46296	0.492103	ATP1B3	http://www.genome.jp/kegg-bin/show_pathway?hsa04961/hsa:483%09red
Osteoclast differentiation	KEGG PATHWAY	hsa04380	2	128	0.468096	0.496712	TNFRSF11A|FOSL2	http://www.genome.jp/kegg-bin/show_pathway?hsa04380/hsa:8792%09red/hsa:2355%09red
FoxO signaling pathway	KEGG PATHWAY	hsa04068	2	132	0.483855	0.510644	INSR|EGFR	http://www.genome.jp/kegg-bin/show_pathway?hsa04068/hsa:1956%09red/hsa:3643%09red
Spliceosome	KEGG PATHWAY	hsa03040	2	135	0.495483	0.52097	HSPA1A|HSPA6	http://www.genome.jp/kegg-bin/show_pathway?hsa03040/hsa:3310%09red/hsa:3303%09red
Apoptosis	KEGG PATHWAY	hsa04210	2	136	0.499322	0.524829	TUBA1C|ITPR3	http://www.genome.jp/kegg-bin/show_pathway?hsa04210/hsa:84790%09red/hsa:3710%09red
Glutathione metabolism	KEGG PATHWAY	hsa00480	1	56	0.500863	0.525737	G6PD	http://www.genome.jp/kegg-bin/show_pathway?hsa00480/hsa:2539%09red
Lysine degradation	KEGG PATHWAY	hsa00310	1	59	0.518802	0.542185	ALDH7A1	http://www.genome.jp/kegg-bin/show_pathway?hsa00310/hsa:501%09red
Long-term depression	KEGG PATHWAY	hsa04730	1	60	0.524637	0.546995	ITPR3	http://www.genome.jp/kegg-bin/show_pathway?hsa04730/hsa:3710%09red
Thermogenesis	KEGG PATHWAY	hsa04714	3	231	0.540228	0.562496	CREB3L3|CREB3L1|ADCY3	http://www.genome.jp/kegg-bin/show_pathway?hsa04714/hsa:109%09red/hsa:90993%09red/hsa:84699%09red
Non-alcoholic fatty liver disease (NAFLD)	KEGG PATHWAY	hsa04932	2	149	0.547486	0.568529	INSR|XBP1	http://www.genome.jp/kegg-bin/show_pathway?hsa04932/hsa:7494%09red/hsa:3643%09red
Inflammatory bowel disease (IBD)	KEGG PATHWAY	hsa05321	1	65	0.552771	0.573825	IL2RG	http://www.genome.jp/kegg-bin/show_pathway?hsa05321/hsa:3561%09red
Long-term potentiation	KEGG PATHWAY	hsa04720	1	67	0.563554	0.583848	ITPR3	http://www.genome.jp/kegg-bin/show_pathway?hsa04720/hsa:3710%09red
Fc epsilon RI signaling pathway	KEGG PATHWAY	hsa04664	1	68	0.568847	0.588744	ALOX5AP	http://www.genome.jp/kegg-bin/show_pathway?hsa04664/hsa:241%09red
Adipocytokine signaling pathway	KEGG PATHWAY	hsa04920	1	69	0.574077	0.593958	SLC2A1	http://www.genome.jp/kegg-bin/show_pathway?hsa04920/hsa:6513%09red
Melanoma	KEGG PATHWAY	hsa05218	1	72	0.589389	0.607575	EGFR	http://www.genome.jp/kegg-bin/show_pathway?hsa05218/hsa:1956%09red
Drug metabolism - cytochrome P450	KEGG PATHWAY	hsa00982	1	72	0.589389	0.607575	UGT1A10	http://www.genome.jp/kegg-bin/show_pathway?hsa00982/hsa:54575%09red
Inositol phosphate metabolism	KEGG PATHWAY	hsa00562	1	74	0.59929	0.616147	MTMR2	http://www.genome.jp/kegg-bin/show_pathway?hsa00562/hsa:8898%09red
Glioma	KEGG PATHWAY	hsa05214	1	75	0.604151	0.620939	EGFR	http://www.genome.jp/kegg-bin/show_pathway?hsa05214/hsa:1956%09red
Pertussis	KEGG PATHWAY	hsa05133	1	76	0.608954	0.625048	CFL1	http://www.genome.jp/kegg-bin/show_pathway?hsa05133/hsa:1072%09red
Metabolism of xenobiotics by cytochrome P450	KEGG PATHWAY	hsa00980	1	76	0.608954	0.625048	UGT1A10	http://www.genome.jp/kegg-bin/show_pathway?hsa00980/hsa:54575%09red
B cell receptor signaling pathway	KEGG PATHWAY	hsa04662	1	82	0.63657	0.650814	CARD11	http://www.genome.jp/kegg-bin/show_pathway?hsa04662/hsa:84433%09red
Peroxisome	KEGG PATHWAY	hsa04146	1	83	0.64098	0.654461	SOD1	http://www.genome.jp/kegg-bin/show_pathway?hsa04146/hsa:6647%09red
PD-L1 expression and PD-1 checkpoint pathway in cancer	KEGG PATHWAY	hsa05235	1	89	0.666339	0.67857	EGFR	http://www.genome.jp/kegg-bin/show_pathway?hsa05235/hsa:1956%09red
mRNA surveillance pathway	KEGG PATHWAY	hsa03015	1	91	0.674389	0.685643	PPP2R2C	http://www.genome.jp/kegg-bin/show_pathway?hsa03015/hsa:5522%09red
Epstein-Barr virus infection	KEGG PATHWAY	hsa05169	2	201	0.706619	0.715835	MYC|VIM	http://www.genome.jp/kegg-bin/show_pathway?hsa05169/hsa:4609%09red/hsa:7431%09red
AGE-RAGE signaling pathway in diabetic complications	KEGG PATHWAY	hsa04933	1	100	0.708279	0.717283	PRKCD	http://www.genome.jp/kegg-bin/show_pathway?hsa04933/hsa:5580%09red
T cell receptor signaling pathway	KEGG PATHWAY	hsa04660	1	103	0.718775	0.727437	CARD11	http://www.genome.jp/kegg-bin/show_pathway?hsa04660/hsa:84433%09red
Chagas disease (American trypanosomiasis)	KEGG PATHWAY	hsa05142	1	103	0.718775	0.727437	PPP2R2C	http://www.genome.jp/kegg-bin/show_pathway?hsa05142/hsa:5522%09red
Serotonergic synapse	KEGG PATHWAY	hsa04726	1	115	0.757121	0.764006	ITPR3	http://www.genome.jp/kegg-bin/show_pathway?hsa04726/hsa:3710%09red
Yersinia infection	KEGG PATHWAY	hsa05135	1	121	0.77429	0.781078	SRC	http://www.genome.jp/kegg-bin/show_pathway?hsa05135/hsa:6714%09red
Insulin signaling pathway	KEGG PATHWAY	hsa04910	1	137	0.814381	0.819923	INSR	http://www.genome.jp/kegg-bin/show_pathway?hsa04910/hsa:3643%09red
RNA transport	KEGG PATHWAY	hsa03013	1	165	0.868201	0.871004	EIF4EBP2	http://www.genome.jp/kegg-bin/show_pathway?hsa03013/hsa:1979%09red
Alzheimer disease	KEGG PATHWAY	hsa05010	1	171	0.877529	0.879227	ITPR3	http://www.genome.jp/kegg-bin/show_pathway?hsa05010/hsa:3710%09red
Olfactory transduction	KEGG PATHWAY	hsa04740	1	448	0.995918	0.995918	ADCY3	http://www.genome.jp/kegg-bin/show_pathway?hsa04740/hsa:109%09red
--------------------
#Term	Database	ID	Input number	Background number	P-Value	Corrected P-Value	Input	Hyperlink
--------------------
#Term	Database	ID	Input number	Background number	P-Value	Corrected P-Value	Input	Hyperlink
protein binding	Gene Ontology	GO:0005515	295	11779	4.68884e-45	1.45682e-41	STX1A|HSPA6|STYK1|NRCAM|ADGRL1|SCG2|GJB4|LRFN4|SEMA4A|PYCR1|PFKP|SEMA4D|SAR1B|FURIN|CACNA1I|DLG3|PEBP4|PTH2R|NR0B2|TMEM159|CYP4F11|PPP2R2C|DUSP4|CEP126|FAM110A|AP1M2|ESRP1|GLI1|ITGA2|MYC|GOT1|MTMR2|TMEM51|DOC2A|TRIM29|METTL9|ZNF683|LRRC6|CDH23|ATP1B3|KCNF1|RBM38|MSX1|SMIM22|OSBPL3|ORAI2|OSBPL7|BMP7|PTPRT|ARPC1B|VCAN|MST1R|PKIA|SLC2A1|VIM|RUNX1|LSAMP|S100P|TRIM59|LRP8|YBX3|TM4SF5|PDLIM4|CNST|NFATC…	http://amigo.geneontology.org/amigo/term/GO:0005515
plasma membrane	Gene Ontology	GO:0005886	154	4619	2.13167e-31	3.31155e-28	DUOXA1|STX1A|HSPA6|STYK1|NRCAM|SLC6A8|LRFN4|RASAL1|SEMA4A|TM4SF5|SEMA4D|FURIN|CACNA1I|DLG3|SPINT1|TRIM16|RELT|SLC6A6|ENTPD2|SOD1|MUC1|APOBR|ATP1B3|KCNF1|KCNN4|OSBPL3|STK17B|OSBPL7|SYT8|ADCY3|MST1R|SLC2A1|VIM|LSAMP|LRP8|ERVMER34-1|GPR17|CNST|ANO9|TNFSF15|SLC2A3|ITGA2|ITGA3|MX2|SCCPDH|SLC7A1|SLC29A2|KREMEN2|ARL4C|TNFRSF18|ARL4A|PREX2|SLC9A2|SLC11A1|GPRC5A|CEACAM5|CEACAM6|JAML|ANXA13|CLDN4|PLXDC1|EP…	http://amigo.geneontology.org/amigo/term/GO:0005886
integral component of plasma membrane	Gene Ontology	GO:0005887	67	1380	5.21433e-21	5.40031e-18	GPR17|EFNB2|FXYD3|TNFSF15|NRCAM|PLAUR|SLC6A8|DCLK1|GPNMB|LRRC26|INSR|GABRP|PTAFR|SLC29A2|CCR6|ITPR3|GAL3ST1|SEMA4A|GPRC5A|TNFRSF18|SLC6A6|PCDHB9|PCDHB8|GPR35|UGT1A10|SLC11A1|PCDHB2|CD83|GJB4|TM4SF5|CEACAM5|PCDHB16|SEMA3E|JAG2|CLDN4|MUC1|ADGRB2|EPHB2|EGFR|SLC13A2|PODXL2|PTH2R|SEMA4D|CHRNA4|TSPAN3|CHRNA7|ADGRL1|SLC26A9|SLC7A1|SLC39A4|SEMA3A|PTPRT|TPBG|OLR1|ADCY3|SLC16A3|IL2RG|MST1R|SLC7A11|SLC2A1|A…	http://amigo.geneontology.org/amigo/term/GO:0005887
integral component of membrane	Gene Ontology	GO:0016021	113	3643	5.92715e-20	4.60392e-17	DUOXA1|SLC6A6|STYK1|SLC6A8|TM4SF5|B3GNT5|CYP4F11|RELT|TMEM178B|GOT1|TMEM51|ENTPD2|MUC1|CDH23|GALNT14|KCNF1|XYLT1|SMIM22|SYT8|ADCY3|SLC2A3|FA2H|SLC2A1|ADGRG1|TRIM59|SYNGR3|ERVMER34-1|CNST|ZDHHC11B|ANO9|TNFSF15|MFSD10|SLC29A2|KREMEN2|TMEM132A|CTXN1|PCDHB9|SLC9A2|PCDHB2|PLEKHB1|JAML|ATG9B|PLXDC1|ABCA3|ORAI2|IGSF9B|TMPRSS13|TM4SF19|NELL2|GALNT7|PCNX2|ABCA12|STX1A|CXCR4|SLC2A12|PTAFR|CD300LB|EPCAM|LHF…	http://amigo.geneontology.org/amigo/term/GO:0016021
extracellular exosome	Gene Ontology	GO:0070062	76	2085	6.36383e-17	3.95448e-14	ALDH1L1|CDH11|HSPA6|FURIN|PRDX6|ARMC9|S100P|INSR|LRRC26|HSPA1A|FABP5|GPA33|EVPL|LAMB1|PTGDS|PFKP|CTH|S100A14|FH|ENTPD2|YWHAZ|ITGB4|EPCAM|SPINT1|PEBP4|GCNT3|GPRC5A|SOD1|CPNE7|QPCT|TMEM132A|CEACAM5|CRABP2|S100A4|ANXA13|S100A6|MTMR2|LDHB|PKM|SRC|ITGA3|CLIC3|CLIC1|COMP|SLC13A2|CXCR4|FXYD3|TUBB3|ASS1|ATP1B3|CARD11|TSPAN3|ENO2|GPC4|CFL1|SLC1A5|SLC26A9|HGD|GALNT7|DYNC2H1|MUC1|ALDH7A1|GALK1|ARPC1B|PRKCD|…	http://amigo.geneontology.org/amigo/term/GO:0070062
extracellular region	Gene Ontology	GO:0005576	65	1843	6.51655e-14	3.37449e-11	STX1A|UTS2|HSPA6|MMP12|AMPD3|PLAUR|VCAN|S100P|IMPDH1|MAPK15|HSPA1A|FABP5|FST|LAMB1|PTGDS|DNAAF4|SERPINE2|FURIN|NPNT|SPINT1|WNT10B|PTHLH|QPCT|NRCAM|GAL|CEACAM5|TNFRSF18|PRDX6|GUCA2A|IL4I1|S100A6|PLXDC1|PKM|EPHB2|BMP7|SOD1|COMP|LRRC6|PRKCD|SCCPDH|HDGFL3|GPC4|PLA2G2D|S100A4|SEMA3E|NELL2|CHIT1|SEMA3A|GLB1L2|LFNG|MBL2|EMILIN2|OLR1|LRP8|COL11A1|NPB|VWDE|NTM|LSAMP|MMP9|FLNA|C4orf48|CTHRC1|ERVMER34-1|NXP…	http://amigo.geneontology.org/amigo/term/GO:0005576
cytoplasm	Gene Ontology	GO:0005737	114	4624	3.79239e-13	1.68328e-10	HSPA6|TRIM16|SCG2|PTHLH|ASS1|NR0B2|CEP126|FAM110A|MTMR2|SOD1|LRRC6|PPP1R14D|ADCY3|PKIA|VIM|FABP5|YBX3|MMP12|RASSF1|MX2|PNMA1|ARL4C|PHLDA2|CHD3|TUBA1C|DNAAF4|TEKT2|PLEKHB1|ANXA13|SAMD9|PLXDC1|PKM|PDLIM4|TUBB3|ARHGEF38|MMACHC|ITPR3|SCRN1|EPS8L3|ABCA12|GALK1|G6PD|SNCG|EIF4EBP2|FLNA|CRIP1|PIWIL4|MYO1A|MAPK15|TMSB10|FST|EVPL|FH|CTH|NELL2|MLF1|NAV1|CAPG|NLRP2|HOXA10|DUSP4|S100A6|SRC|CLIC3|MYEF2|CLIC1|L…	http://amigo.geneontology.org/amigo/term/GO:0005737
membrane	Gene Ontology	GO:0016020	68	2075	4.42698e-13	1.71933e-10	DUOXA1|SPHK1|SPINT1|FURIN|PRDX6|EGFR|CNST|FA2H|MYO18A|INSR|ALOX5AP|PTAFR|EVPL|GAL3ST1|FAM83B|LHFPL2|PHLDA2|LSP1|GALNT7|GCNT3|NAP1L1|ITPR3|PFKP|LPCAT4|FUT4|OSBPL3|LPCAT1|TMEM178B|GOT1|SLC7A1|MTMR2|LDHB|PRRT1B|ORAI2|VCAN|APOBR|CLIC1|MX2|SLC13A2|CDH23|SCCPDH|CHRNA4|ENO2|PIGS|LGALS8|CFL1|SLC1A5|GRAMD1B|NELL2|CAPG|OSBPL7|ITGAX|RCC2|IL2RG|GALK1|OLR1|ADCY3|SLC16A3|G6PD|SLC7A11|SLC2A1|SGPP2|CREB3L3|ADRB2…	http://amigo.geneontology.org/amigo/term/GO:0016020
cytosol	Gene Ontology	GO:0005829	119	5095	3.44563e-12	1.07056e-09	HSPA6|TRIM16|AP1M2|SCG2|IMPDH1|MOCS2|RASAL1|ASS1|IGF2BP3|DLG3|AGTRAP|PPP2R2C|PDE7A|MYB|MTMR2|CDCA7|PLBD1|SOD1|LRRC6|BCAT1|OSBPL3|OSBPL7|ARPC1B|ALDH1L1|SLC2A1|VIM|LSAMP|YBX3|NFATC4|RAB6D|MX2|HOXC6|ARHGAP8|SEC16B|ARHGEF10L|SERPINE2|ARL4A|TNNT1|PREX2|CTH|DISC1|SAPCD2|SAMD9|PKM|EPHB2|RASGEF1A|SMC1B|RHOV|HOXB7|MMACHC|EVPL|CAPG|ABCA12|GALK1|HDGFL3|G6PD|FLNA|STX1A|AMPD3|C15orf39|FABP5|FH|DNAAF4|ZBTB16|N…	http://amigo.geneontology.org/amigo/term/GO:0005829
nucleus	Gene Ontology	GO:0005634	118	5208	3.00775e-11	8.49554e-09	HSPA6|SCG2|PFKP|ASS1|NR0B2|DUSP4|ESRP1|ZNF267|MYC|MYB|MTMR2|ZNF43|SOD1|ZNF683|SCCPDH|STK17B|ARPC1B|PKIA|RUNX1|YBX3|NIT1|NFATC4|MMP12|RASSF1|ITGA2|MX2|HOXC6|FH|ARL4C|ARL4A|ARNTL|CHD3|TUBA1C|TEKT2|DISC1|RALGDS|ZNF761|RBM38|PKM|PDLIM4|FOXJ1|HOXB9|TUBB3|HOXB7|SCRN1|CAPG|HDGFL3|SPDEF|FLNA|PIWIL4|MAPK15|FABP5|FST|CHCHD10|DNAAF4|CBX2|MLF1|ZBTB16|MECOM|HOXA10|FOSL2|S100A4|ZNF107|S100A6|SRC|CLIC3|MYEF2|CL…	http://amigo.geneontology.org/amigo/term/GO:0005634
cell adhesion	Gene Ontology	GO:0007155	27	478	1.82921e-10	4.73614e-08	CDH11|EFNB2|CDH17|ITGA2|VCAN|TPBG|LAMB1|SEMA4D|ITGB4|PCDHB9|PCDHB8|PCDHB2|GPNMB|PCDHB16|CLDN4|SRC|LSAMP|ITGB6|FERMT1|TINAG|FES|NELL2|ITGAX|PTPRT|EMILIN2|NTM|ADGRG1	http://amigo.geneontology.org/amigo/term/GO:0007155
signal transduction	Gene Ontology	GO:0007165	39	1013	9.0545e-10	2.16403e-07	TNFSF15|PLAUR|EGFR|RIPK2|ARHGAP8|CCR6|RASAL1|FAM83B|GPRC5A|FAM83E|YWHAZ|CRABP2|CD83|GPNMB|TNFRSF18|CEACAM6|GUCA2A|S100A6|SRC|CLIC3|CLIC1|VGF|PRKCD|CHRNA4|LTB|CHRNA7|TNFRSF11A|PTPRT|RHPN1|HDGFL3|ADCY3|CCL18|RIN1|LRP8|IL2RG|MST1R|GABRP|LSP1|CHRNA5	http://amigo.geneontology.org/amigo/term/GO:0007165
integrin binding	Gene Ontology	GO:0005178	15	142	9.83165e-10	2.18192e-07	ITGAX|SRC|ITGB4|CDH17|ITGB6|COMP|ITGA2|ITGA3|EGFR|GPNMB|NPNT|JAML|FERMT1|LGALS8|LAMB1	http://amigo.geneontology.org/amigo/term/GO:0005178
cell surface	Gene Ontology	GO:0009986	29	598	1.11027e-09	2.29975e-07	CDH17|PLAUR|ITGA2|ITGA3|EGFR|MYO18A|CCR6|LRFN4|FURIN|PPFIA4|CEACAM5|CEACAM6|MBL2|EPCAM|ITGB4|ITGB6|CXCR4|GPC4|SLC26A9|ITGAX|PTPRT|TPBG|SFRP4|IL2RG|MST1R|SLC7A11|VWDE|FUT4|LPAR2	http://amigo.geneontology.org/amigo/term/GO:0009986
extracellular space	Gene Ontology	GO:0005615	50	1572	1.93225e-09	3.75218e-07	COL11A1|MMP12|PRDX6|EGFR|SCG2|FST|SEMA4A|LAMB1|PTGDS|SEMA4D|S100A14|SERPINE2|FURIN|YWHAZ|DLG3|SPINT1|TNFSF15|WNT10B|SOD1|PTHLH|GAL|CEACAM6|S100A4|ANXA13|MBL2|MUC1|UTS2|BMP7|PLBD1|CLIC1|COMP|VGF|XYLT1|LTB|ENO2|LGALS8|TINAG|CFL1|HMCN2|CHIT1|SEMA3A|SEMA3E|MTHFD2|SFRP4|CCL18|VCAN|LGALS9|ABCA3|MMP9|CTHRC1	http://amigo.geneontology.org/amigo/term/GO:0005615
extracellular matrix organization	Gene Ontology	GO:0030198	18	252	7.07563e-09	1.29318e-06	ITGAX|SPINT1|ITGB4|MMP12|ITGB6|COMP|ITGA2|ITGA3|COL11A1|SLC7A11|NPNT|SPOCK2|VCAN|ADAMTS17|MMP9|LAMB1|ADAMTS18|FURIN	http://amigo.geneontology.org/amigo/term/GO:0030198
vesicle	Gene Ontology	GO:0031982	14	173	7.99607e-08	1.38021e-05	YWHAZ|BMP7|WDR54|CLIC1|TUBA1C|MUC1|MYO1A|HSPA1A|RIPK2|CFL1|KCNN4|MYO7B|GPRC5A|PKM	http://amigo.geneontology.org/amigo/term/GO:0031982
calcium ion binding	Gene Ontology	GO:0005509	28	693	8.82733e-08	1.4435e-05	CDH11|MMP12|VCAN|S100P|HMCN2|S100A14|PCDHB9|PCDHB8|CDH17|PCDHB2|PCDHB16|LPCAT1|JAG2|S100A4|ANXA13|S100A6|DOC2A|COMP|CDH23|PLA2G2D|UNC13A|ITPR3|NELL2|SYT8|LRP8|TESC|NPNT|SPOCK2	http://amigo.geneontology.org/amigo/term/GO:0005509
cadherin binding	Gene Ontology	GO:0045296	18	305	1.09179e-07	1.6961e-05	YWHAZ|CDH11|PTPRT|CDH17|CGN|PRDX6|CDH23|EGFR|SLC7A11|SRC|S100P|HSPA1A|CLIC1|EVPL|FLNA|PFKP|GPRC5A|PKM	http://amigo.geneontology.org/amigo/term/GO:0045296
focal adhesion	Gene Ontology	GO:0005925	21	418	1.28629e-07	1.90309e-05	YWHAZ|SRC|ITGA3|ITGB4|ITGB6|PLAUR|ITGA2|ARL2|EGFR|SLC7A11|VIM|HSPA1A|FERMT1|FES|CFL1|ARPC1B|FLNA|HMGA1|CXCR4|EFNB2|MISP	http://amigo.geneontology.org/amigo/term/GO:0005925
basolateral plasma membrane	Gene Ontology	GO:0016323	15	216	1.78881e-07	2.52629e-05	CA9|SLC6A6|CDH17|SLC16A3|ITGA3|EGFR|DLG3|SLC2A1|SLC7A1|MYO1A|CEACAM5|SLC29A2|STK39|HEPH|EPCAM	http://amigo.geneontology.org/amigo/term/GO:0016323
cell junction	Gene Ontology	GO:0030054	14	190	2.3409e-07	3.16226e-05	DOC2A|SRC|DLG3|ITGB4|CDH17|ITGB6|PRDX6|GJB3|CGN|EGFR|GJB4|FERMT1|CXCR4|HMCN2	http://amigo.geneontology.org/amigo/term/GO:0030054
DNA-binding transcription factor activity, RNA polymerase II-specific	Gene Ontology	GO:0000981	31	874	2.85343e-07	3.69401e-05	NFATC4|HOXC6|MYBL2|ELF4|XBP1|ARNTL|HOXA11|HOXA10|CREB3L1|FOSL2|MSX1|MYC|MYB|FOXJ1|HOXB8|HOXB9|MYEF2|EVX1|HOXB7|PBX4|PAX9|HOXB13|NFIC|MXI1|SPDEF|CREB3L3|RUNX1|HOXA3|NFIX|GLI1|YBX3	http://amigo.geneontology.org/amigo/term/GO:0000981
positive regulation of cell migration	Gene Ontology	GO:0030335	15	227	3.25416e-07	4.04427e-05	SEMA3A|ITGAX|SPHK1|SEMA3E|SEMA4D|MMP9|EGFR|GPNMB|SMIM22|INSR|CEACAM6|LAMB1|SEMA4A|CLDN4|XBP1	http://amigo.geneontology.org/amigo/term/GO:0030335
lysosome	Gene Ontology	GO:0005764	16	262	3.60008e-07	4.3021e-05	DOC2A|SRC|PEBP4|TRIM29|PLBD1|SLC11A1|CHIT1|SOD1|ADRB2|INSR|TINAG|CXCR4|RAB7B|IL4I1|ASS1|ABCB9	http://amigo.geneontology.org/amigo/term/GO:0005764
receptor complex	Gene Ontology	GO:0043235	14	207	6.17553e-07	6.85263e-05	EPHB2|ITGA3|ITGB4|OLR1|ITGB6|EGFR|LRP8|IL2RG|MST1R|ADRB2|INSR|ITPR3|GPRC5A|PLXDC1	http://amigo.geneontology.org/amigo/term/GO:0043235
apical plasma membrane	Gene Ontology	GO:0016324	18	354	8.61007e-07	8.91717e-05	EPCAM|SAPCD2|SLC6A6|SLC39A4|SLC16A3|EGFR|ADRB2|SLC2A1|SLC7A1|SHROOM1|CEACAM5|MYO1A|CEACAM6|SLC26A9|ANXA13|STK39|CLDN4|MUC1	http://amigo.geneontology.org/amigo/term/GO:0016324
neutrophil degranulation	Gene Ontology	GO:0043312	21	482	1.17326e-06	0.000117591	PLAUR|ITGAX|HSPA6|OLR1|SLC11A1|AMPD3|PRDX6|CHIT1|MMP9|SLC2A3|PRKCD|QPCT|IMPDH1|HSPA1A|FABP5|PTAFR|CEACAM6|S100P|LPCAT1|NBEAL2|PKM	http://amigo.geneontology.org/amigo/term/GO:0043312
collagen-containing extracellular matrix	Gene Ontology	GO:0062023	18	370	1.56685e-06	0.000151712	BMP7|NPNT|MBL2|EMILIN2|COMP|VCAN|COL11A1|ADAMDEC1|LGALS9|GPC4|S100A4|MMP9|LAMB1|HMCN2|S100A6|CTHRC1|SERPINE2|PKM	http://amigo.geneontology.org/amigo/term/GO:0062023
homophilic cell adhesion via plasma membrane adhesion molecules	Gene Ontology	GO:0007156	12	162	1.61136e-06	0.000151712	CDH11|PCDHB9|PCDHB8|IGSF9B|CDH17|PCDHB2|CDH23|SLC7A11|PTPRT|CEACAM5|PCDHB16|CEACAM6	http://amigo.geneontology.org/amigo/term/GO:0007156
positive regulation of transcription by RNA polymerase II	Gene Ontology	GO:0045944	35	1159	1.79477e-06	0.00016401	NFATC4|MMP12|FOXJ1|EGFR|SCG2|RIPK2|OVOL2|MYBL2|ELF4|XBP1|ARNTL|SLC11A1|ASXL3|HOXA10|GAL|FOSL2|MSX1|MYC|MYB|NFIC|HOXB9|HMGA2|EVX1|HOXB7|HMGA1|EPCAM|PAX9|BMP7|SPDEF|CREB3L3|ADRB2|RUNX1|HOXA3|NFIX|GLI1	http://amigo.geneontology.org/amigo/term/GO:0045944
skeletal system development	Gene Ontology	GO:0001501	11	137	2.11094e-06	0.000187392	BMP7|CDH11|PAPSS2|COMP|VCAN|PTHLH|HOXA11|HOXA10|FST|MMP9|JAG2	http://amigo.geneontology.org/amigo/term/GO:0001501
apoptotic process	Gene Ontology	GO:0006915	22	546	2.23263e-06	0.000192689	TNFSF15|MFSD10|RIPK2|S100A14|TNFRSF18|PHLDA2|BCL2L15|BIK|NLRP2|MECOM|RELT|CEACAM5|CDCA7|CXCR4|COMP|EFNA5|CEACAM6|PRKCD|STK17B|ZBTB16|SEMA3A|GULP1	http://amigo.geneontology.org/amigo/term/GO:0006915
perinuclear region of cytoplasm	Gene Ontology	GO:0048471	25	697	3.37999e-06	0.000278831	PRDX6|ITGA2|ITGA3|EGFR|SLC2A12|HSPA1A|LAMB1|PTGDS|RELT|S100A14|UGT1A10|PRR7|DISC1|SELENOM|S100A4|S100A6|MTMR2|PDLIM4|SRC|CLIC1|PRKCD|HEPH|SNCG|FLNA|YBX3	http://amigo.geneontology.org/amigo/term/GO:0048471
signaling receptor binding	Gene Ontology	GO:0005102	17	353	3.46318e-06	0.000278831	EPHB2|SRC|ABCA12|TNFSF15|STYK1|PLAUR|VWDE|LTB|HSPA1A|RIPK2|UTS2|FES|CFL1|MBL2|SEMA4D|SERPINE2|NXPH4	http://amigo.geneontology.org/amigo/term/GO:0005102
actin filament binding	Gene Ontology	GO:0051015	13	208	3.51973e-06	0.000278831	MYO7B|ARPC1B|EGFR|MYO1A|MYO18A|SHROOM1|FERMT1|TNNI3|CFL1|USH1C|FLNA|EPS8L3|MISP	http://amigo.geneontology.org/amigo/term/GO:0051015
negative regulation of apoptotic process	Gene Ontology	GO:0043066	20	487	4.90743e-06	0.000363033	YWHAZ|SRC|SPHK1|MSX1|EPCAM|COMP|MMP9|HMGA2|MYO18A|HSPA1A|RIPK2|CEACAM5|CFL1|PLAUR|FLNA|EGFR|SEMA4D|MYC|TNFRSF18|XBP1	http://amigo.geneontology.org/amigo/term/GO:0043066
anterior/posterior pattern specification	Gene Ontology	GO:0009952	9	96	5.58365e-06	0.000403451	HOXB8|HOXB9|ZBTB16|HOXB7|HOXA11|HOXC6|HOXA3|MSX1|HOXA10	http://amigo.geneontology.org/amigo/term/GO:0009952
integrin-mediated signaling pathway	Gene Ontology	GO:0007229	9	97	6.03706e-06	0.000426299	ITGAX|SRC|RCC2|ITGB4|CDH17|ITGB6|ITGA2|ITGA3|FERMT1	http://amigo.geneontology.org/amigo/term/GO:0007229
axon guidance	Gene Ontology	GO:0007411	13	222	6.86259e-06	0.000473824	SEMA3A|BMP7|SEMA3E|SRC|EFNA5|EPHB2|TUBB3|SLC7A11|CXCR4|SEMA4A|NELL2|SEMA4D|EFNB2	http://amigo.geneontology.org/amigo/term/GO:0007411
neuron projection	Gene Ontology	GO:0043005	16	336	7.64465e-06	0.000516346	DOC2A|EPHB2|STX1A|IGSF9B|SRC|NRCAM|ADGRL1|GABRP|CPEB3|VIM|CHRNA4|CHRNA5|KCNN4|CHRNA7|UNC13A|S100A4	http://amigo.geneontology.org/amigo/term/GO:0043005
ATP binding	Gene Ontology	GO:0005524	39	1463	8.1336e-06	0.000531033	SPHK1|HSPA6|STYK1|DCLK1|CKMT1A|MYO1A|PFKFB4|MYO18A|HSPA1A|RIPK2|AACS|ASS1|CHD3|PAPSS2|NLRP2|STK17B|PFKP|ABCB9|MAPK15|PKM|EPHB2|SRC|SMC1B|ENTPD2|EGFR|PRKCD|FES|DYNC2H1|ABCA12|AK8|GALK1|ADCY3|PFKFB3|MST1R|INSR|RUNX1|ABCA3|STK39|MYO7B	http://amigo.geneontology.org/amigo/term/GO:0005524
leukocyte migration	Gene Ontology	GO:0050900	12	192	8.31616e-06	0.000531033	ITGAX|FOXJ1|OLR1|SRC|SLC16A3|ITGA3|SLC7A11|ATP1B3|CEACAM5|CEACAM6|JAML|EPCAM	http://amigo.geneontology.org/amigo/term/GO:0050900
synapse	Gene Ontology	GO:0045202	18	420	8.37484e-06	0.000531033	UTS2|PPFIA4|CHRNA5|PCDHB2|EGFR|PCDHB9|CPEB3|GABRP|CHRNA4|SNCG|MX2|FABP5|GPC4|PCDHB16|ADGRL1|USH1C|CHRNA7|MBL2	http://amigo.geneontology.org/amigo/term/GO:0045202
intracellular membrane-bounded organelle	Gene Ontology	GO:0043231	26	788	9.0178e-06	0.000560366	SPHK1|AP1M2|CNST|SEC16B|GPRC5A|ARNTL|CACNA1I|NLRP2|GJB3|CYP4F11|ABCB9|AGTRAP|SAMD9|VGF|FZD7|OSBPL3|OSBPL7|MISP|ABCA12|OLR1|G6PD|SLC7A11|MTMR2|RUNX1|ABCA3|STK39	http://amigo.geneontology.org/amigo/term/GO:0043231
endoplasmic reticulum membrane	Gene Ontology	GO:0005789	29	942	9.85355e-06	0.000600293	DUOXA1|PLAUR|EGFR|ALOX5AP|TRIM59|GRAMD1B|PTGDS|SEC16B|TMEM132A|TMEM159|UGT1A10|ITPR3|CYP4F11|LPCAT4|LPCAT1|AGTRAP|SGPP2|ENTPD2|MUC1|PIGS|OSBPL3|SAR1B|OSBPL7|DEGS2|FA2H|CREB3L3|CREB3L1|TMTC2|RNF145	http://amigo.geneontology.org/amigo/term/GO:0005789
calcium-dependent protein binding	Gene Ontology	GO:0048306	8	78	1.0126e-05	0.00060503	SYT8|STX1A|S100P|TNNI3|S100A4|S100A6|S100A14|MBL2	http://amigo.geneontology.org/amigo/term/GO:0048306
axon	Gene Ontology	GO:0030424	15	310	1.22358e-05	0.000717292	SEMA3A|SYT8|NELL2|MX2|LRP8|PRSS12|EPHB2|TUBB3|STX1A|SLC7A11|SNCG|INSR|ADGRL1|KCNB1|MTMR2	http://amigo.geneontology.org/amigo/term/GO:0030424
negative chemotaxis	Gene Ontology	GO:0050919	6	37	1.27398e-05	0.000733012	SEMA3A|SEMA3E|EFNA5|SEMA4A|NELL2|SEMA4D	http://amigo.geneontology.org/amigo/term/GO:0050919
oxidation-reduction process	Gene Ontology	GO:0055114	20	525	1.40498e-05	0.000787281	HGD|DEGS2|G6PD|MTHFD2|SOD1|HR|PRDX6|ALDH1L1|CYP4F11|IMPDH1|SCCPDH|MMACHC|SELENOM|ALDH7A1|HEPH|IL4I1|HPDL|PYCR1|LDHB|FA2H	http://amigo.geneontology.org/amigo/term/GO:0055114
calcium-dependent cell-cell adhesion via plasma membrane cell adhesion molecules	Gene Ontology	GO:0016339	6	38	1.46013e-05	0.000795898	CDH11|PCDHB9|CDH17|PCDHB2|CDH23|PCDHB16	http://amigo.geneontology.org/amigo/term/GO:0016339
O-glycan processing	Gene Ontology	GO:0016266	7	59	1.53597e-05	0.000819372	B3GNT5|GALNT14|GALNT12|GCNT3|MUC1|GXYLT2|GALNT7	http://amigo.geneontology.org/amigo/term/GO:0016266
nuclear chromatin	Gene Ontology	GO:0000790	28	915	1.55594e-05	0.000819372	NFATC4|SCG2|HOXC6|ELF4|ARNTL|NR0B2|ASXL3|HOXA10|CREB3L1|FOSL2|MSX1|MYC|FOXJ1|HOXB8|HOXB9|MUC1|EVX1|HOXB7|PBX4|PAX9|HOXB13|NFIC|MXI1|SPDEF|CREB3L3|RUNX1|HOXA3|NFIX	http://amigo.geneontology.org/amigo/term/GO:0000790
response to drug	Gene Ontology	GO:0042493	14	280	1.67959e-05	0.00086975	SRC|CA9|UGT1A10|SOD1|LRP8|ITGA3|GAL|MUC1|ABCA3|ITGA2|AACS|MYC|ASS1|GAD1	http://amigo.geneontology.org/amigo/term/GO:0042493
secretion by cell	Gene Ontology	GO:0032940	4	10	1.92993e-05	0.000978509	STX1A|ABCA12|SERPINE2|FURIN	http://amigo.geneontology.org/amigo/term/GO:0032940
negative regulation of transcription by RNA polymerase II	Gene Ontology	GO:0000122	26	832	2.21941e-05	0.00109456	MMP12|SCG2|CPEB3|FST|OVOL2|SEMA4D|CBX2|ZBTB16|NR0B2|WNT10B|CREB3L1|MSX1|MYC|MYB|FOXJ1|HOXB8|TRIM29|HMGA2|HOXB13|NFIC|MXI1|SPDEF|PKIA|RUNX1|NFIX|YBX3	http://amigo.geneontology.org/amigo/term/GO:0000122
chloride channel activity	Gene Ontology	GO:0005254	7	64	2.49001e-05	0.00119023	ANO9|CLIC3|CLIC1|GABRP|SLC26A9|CLDN4|FXYD3	http://amigo.geneontology.org/amigo/term/GO:0005254
mesodermal cell differentiation	Gene Ontology	GO:0048333	4	11	2.60654e-05	0.00122705	ITGA2|ITGA3|HMGA2|ITGB4	http://amigo.geneontology.org/amigo/term/GO:0048333
multicellular organism development	Gene Ontology	GO:0007275	18	462	2.82672e-05	0.00127399	EPHB2|CDH11|PIWIL4|MST1R|VCAN|SPDEF|HMGA2|CATSPER1|HOXA11|HOXA10|PLEKHB1|ZNF267|INSR|CREB3L1|FST|HOXB7|EGFR|HOXC6	http://amigo.geneontology.org/amigo/term/GO:0007275
integrin complex	Gene Ontology	GO:0008305	5	25	2.82927e-05	0.00127399	ITGAX|ITGA2|ITGA3|ITGB4|ITGB6	http://amigo.geneontology.org/amigo/term/GO:0008305
synaptic membrane adhesion	Gene Ontology	GO:0099560	5	25	2.82927e-05	0.00127399	GPC4|EFNA5|IGSF9B|SLITRK3|LRFN4	http://amigo.geneontology.org/amigo/term/GO:0099560
bicellular tight junction	Gene Ontology	GO:0005923	9	122	3.33113e-05	0.00147855	DLG3|CGN|MAPK15|PLXDC1|JAML|EPCAM|SAPCD2|CLDN4|YBX3	http://amigo.geneontology.org/amigo/term/GO:0005923
negative regulation of platelet aggregation	Gene Ontology	GO:0090331	4	12	3.44214e-05	0.00148538	ADAMTS18|UBASH3B|PRKCD|SERPINE2	http://amigo.geneontology.org/amigo/term/GO:0090331
peroxisome proliferator activated receptor binding	Gene Ontology	GO:0042975	4	12	3.44214e-05	0.00148538	NR0B2|ASXL3|NFATC4|HMGA1	http://amigo.geneontology.org/amigo/term/GO:0042975
neural crest cell migration	Gene Ontology	GO:0001755	6	46	3.88058e-05	0.00165164	SEMA3A|SEMA3E|OVOL2|CFL1|SEMA4A|SEMA4D	http://amigo.geneontology.org/amigo/term/GO:0001755
chemorepellent activity	Gene Ontology	GO:0045499	5	28	4.57322e-05	0.00192014	SEMA3A|SEMA4A|EFNA5|SEMA3E|SEMA4D	http://amigo.geneontology.org/amigo/term/GO:0045499
basal plasma membrane	Gene Ontology	GO:0009925	6	50	5.94137e-05	0.00242893	MST1R|EGFR|MYO1A|SLC7A1|SLC1A5|CLDN4	http://amigo.geneontology.org/amigo/term/GO:0009925
angiogenesis	Gene Ontology	GO:0001525	12	238	6.16572e-05	0.00248791	YWHAZ|EPHB2|NRCAM|SCG2|HOXA3|OVOL2|ADGRG1|SEMA4A|NELL2|HOXB13|PLXDC1|XBP1	http://amigo.geneontology.org/amigo/term/GO:0001525
animal organ morphogenesis	Gene Ontology	GO:0009887	9	134	6.61143e-05	0.00260022	ITGAX|EFNB2|COMP|ITGA2|LAMB1|PBX4|LFNG|ASXL3|PHLDA2	http://amigo.geneontology.org/amigo/term/GO:0009887
virus receptor activity	Gene Ontology	GO:0001618	7	76	6.86319e-05	0.00264752	EFNB2|ITGB6|ITGA2|EGFR|HSPA1A|CXCR4|SLC1A5	http://amigo.geneontology.org/amigo/term/GO:0001618
response to virus	Gene Ontology	GO:0009615	8	104	6.90212e-05	0.00264752	SRC|HMGA2|DCLK1|MST1R|HMGA1|MX2|CFL1|CXCR4	http://amigo.geneontology.org/amigo/term/GO:0009615
cytoplasmic vesicle	Gene Ontology	GO:0031410	13	285	8.15216e-05	0.00308887	SOD1|AP1M2|VGF|PRSS12|MX2|MAPK15|LGALS8|FES|CXCR4|ANXA13|SLC39A4|ATG9B|ARL14	http://amigo.geneontology.org/amigo/term/GO:0031410
carbohydrate binding	Gene Ontology	GO:0030246	10	172	8.27328e-05	0.003097	GALNT14|GALNT12|OLR1|VCAN|CRYBG2|LGALS9|LGALS8|ADGRL1|GALNT7|MGAM2	http://amigo.geneontology.org/amigo/term/GO:0030246
sequence-specific double-stranded DNA binding	Gene Ontology	GO:1990837	19	553	8.64298e-05	0.00318576	NFIC|ARNTL|HOXB8|HOXB9|NFATC4|SPDEF|EVX1|HOXB7|HOXA11|HOXA10|CREB3L1|OVOL2|HOXB13|NFIX|MSX1|MYBL2|PAX9|ELF4|XBP1	http://amigo.geneontology.org/amigo/term/GO:1990837
brush border	Gene Ontology	GO:0005903	6	54	8.7951e-05	0.00318576	RALGDS|CLIC1|MYO1A|ITPR3|USH1C|MYO7B	http://amigo.geneontology.org/amigo/term/GO:0005903
heparan sulfate proteoglycan binding	Gene Ontology	GO:0043395	4	16	8.818e-05	0.00318576	COMP|ITGA2|FST|PLA2G2D	http://amigo.geneontology.org/amigo/term/GO:0043395
chemical synaptic transmission	Gene Ontology	GO:0007268	12	248	8.95309e-05	0.00319739	DOC2A|UTS2|PCDHB9|CHRNA5|PCDHB2|GABRP|CHRNA4|SNCG|CHRNA7|PCDHB16|GAD1|MBL2	http://amigo.geneontology.org/amigo/term/GO:0007268
positive regulation of transcription, DNA-templated	Gene Ontology	GO:0045893	19	556	9.25038e-05	0.00326601	BMP7|SRC|MYB|ZBTB16|TRIM16|MECOM|EGFR|FZD7|HMGA2|HOXA11|TESC|INSR|RUNX1|MYC|ARNTL|GLI1|PBX4|HMGA1|ELF4	http://amigo.geneontology.org/amigo/term/GO:0045893
RNA polymerase II cis-regulatory region sequence-specific DNA binding	Gene Ontology	GO:0000978	21	656	9.76997e-05	0.00340625	NFIC|MYB|HOXB9|NFATC4|ZBTB16|GLI1|FOXJ1|MUC1|ARNTL|HMGA2|HOXB7|HOXA10|RUNX1|HOXA3|FOSL2|MYC|MYBL2|HOXC6|ELF4|YBX3|XBP1	http://amigo.geneontology.org/amigo/term/GO:0000978
neuron migration	Gene Ontology	GO:0001764	8	110	9.97027e-05	0.00340625	SEMA3A|NRCAM|ITGA3|DCLK1|NAV1|DISC1|CXCR4|DNAAF4	http://amigo.geneontology.org/amigo/term/GO:0001764
postsynaptic density	Gene Ontology	GO:0014069	12	251	9.97647e-05	0.00340625	STX1A|SRC|IGSF9B|MX2|LRP8|DCLK1|CPEB3|PSD3|DISC1|FABP5|ADGRL1|MTMR2	http://amigo.geneontology.org/amigo/term/GO:0014069
DNA-binding transcription activator activity, RNA polymerase II-specific	Gene Ontology	GO:0001228	17	466	0.000101294	0.00342088	NFIC|MYB|RUNX1|FOXJ1|ARNTL|HMGA2|HOXB7|HOXA10|CREB3L3|CREB3L1|OVOL2|FOSL2|MSX1|MYC|MYBL2|PAX9|ELF4	http://amigo.geneontology.org/amigo/term/GO:0001228
semaphorin-plexin signaling pathway	Gene Ontology	GO:0071526	5	34	0.000104512	0.00348129	SEMA3A|SEMA4A|SEMA3E|SEMA4D|FLNA	http://amigo.geneontology.org/amigo/term/GO:0071526
positive regulation of apoptotic process	Gene Ontology	GO:0043065	14	335	0.000106947	0.00349772	BMP7|SRC|ZBTB16|SFRP4|SOD1|WNT10B|SPDEF|HMGA2|GAL|PRR7|RIPK2|PNMA1|STK17B|PHLDA2	http://amigo.geneontology.org/amigo/term/GO:0043065
inflammatory response	Gene Ontology	GO:0006954	15	381	0.000115687	0.00370831	SPHK1|NFATC4|OLR1|ITGB6|CCL18|CYP4F11|GAL|SCG2|SLC11A1|NLRP2|LGALS9|RIPK2|PTAFR|PLA2G2D|CXCR4	http://amigo.geneontology.org/amigo/term/GO:0006954
odontogenesis of dentin-containing tooth	Gene Ontology	GO:0042475	6	57	0.000115773	0.00370831	BMP7|NFIC|SLC7A11|FST|JAG2|MSX1	http://amigo.geneontology.org/amigo/term/GO:0042475
Golgi membrane	Gene Ontology	GO:0000139	20	616	0.000118693	0.00376305	B3GNT5|GALNT14|GALNT7|GALNT12|HS3ST2|GCNT3|MYO18A|AP1M2|AGTRAP|EGFR|SLC7A11|SLC2A1|XYLT1|CREB3L3|LPCAT1|GAL3ST1|SEC16B|GOT1|TMEM132A|FURIN	http://amigo.geneontology.org/amigo/term/GO:0000139
transport across blood-brain barrier	Gene Ontology	GO:0150104	7	84	0.000123149	0.00386489	SLC6A6|SLC2A3|SLC2A1|SLC7A1|INSR|SLC29A2|SLC1A5	http://amigo.geneontology.org/amigo/term/GO:0150104
cellular response to cholesterol	Gene Ontology	GO:0071397	4	18	0.000130605	0.0040579	AACS|GRAMD1B|LRP8|OSBPL7	http://amigo.geneontology.org/amigo/term/GO:0071397
peptidyl-tyrosine autophosphorylation	Gene Ontology	GO:0038083	5	36	0.000133354	0.00410227	SRC|INSR|EGFR|FES|STYK1	http://amigo.geneontology.org/amigo/term/GO:0038083
regulation of hair cycle	Gene Ontology	GO:0042634	3	6	0.000140363	0.00425886	ARNTL|EPS8L3|FA2H	http://amigo.geneontology.org/amigo/term/GO:0042634
vesicle-mediated transport	Gene Ontology	GO:0016192	9	150	0.000148808	0.00442066	SYT8|AP3B2|HSPA6|AP1M2|HSPA1A|ARL14|GOT1|ARL4C|ARL4A	http://amigo.geneontology.org/amigo/term/GO:0016192
chloride transport	Gene Ontology	GO:0006821	5	37	0.000149878	0.00442066	SLC26A9|CLIC1|FXYD3|CLIC3|ANO9	http://amigo.geneontology.org/amigo/term/GO:0006821
positive regulation of gene expression	Gene Ontology	GO:0010628	15	391	0.000151784	0.00442066	BMP7|EPHB2|SFRP4|SLC11A1|NR0B2|ITGA3|HMGA2|ITGAX|TESC|HSPA1A|OVOL2|SLC26A9|SEC16B|MYC|LGALS9	http://amigo.geneontology.org/amigo/term/GO:0010628
positive regulation of synapse assembly	Gene Ontology	GO:0051965	6	61	0.000163258	0.0046967	EPHB2|SLITRK3|EFNA5|TPBG|ADGRL1|ADGRB2	http://amigo.geneontology.org/amigo/term/GO:0051965
glutamatergic synapse	Gene Ontology	GO:0098978	14	354	0.000185208	0.00523129	YWHAZ|EPHB2|DLG3|SRC|NRCAM|UNC13A|STX1A|PRR7|CDH11|GPC4|LRFN4|FLNA|NELL2|EFNB2	http://amigo.geneontology.org/amigo/term/GO:0098978
transmembrane receptor protein tyrosine kinase signaling pathway	Gene Ontology	GO:0007169	8	123	0.000205721	0.00562045	EPHB2|SRC|PTPRT|STYK1|MST1R|EGFR|INSR|FES	http://amigo.geneontology.org/amigo/term/GO:0007169
carbohydrate metabolic process	Gene Ontology	GO:0005975	8	123	0.000205721	0.00562045	GLB1L2|GCNT3|SLC2A3|INSR|FUT4|GALNT7|MGAM2|LDHB	http://amigo.geneontology.org/amigo/term/GO:0005975
cell migration	Gene Ontology	GO:0016477	11	232	0.000206222	0.00562045	RASGEF1A|ITGB4|ITGB6|MST1R|RHOV|MYO18A|GPC4|ADGRG1|LAMB1|CTHRC1|MISP	http://amigo.geneontology.org/amigo/term/GO:0016477
peptidyl-tyrosine phosphorylation	Gene Ontology	GO:0018108	8	124	0.000216711	0.00585496	EPHB2|SRC|EGFR|MST1R|PRKCD|INSR|RIPK2|FES	http://amigo.geneontology.org/amigo/term/GO:0018108
lateral plasma membrane	Gene Ontology	GO:0016328	6	65	0.000224957	0.00602535	SLC16A3|ARL2|MYO1A|EPCAM|KCNB1|CLDN4	http://amigo.geneontology.org/amigo/term/GO:0016328
regulation of gene expression	Gene Ontology	GO:0010468	11	235	0.000229195	0.00606015	ZBTB16|MECOM|COMP|PTHLH|MAPK15|ZNF683|IGF2BP3|CRIP1|MYC|YBX3|PHLDA2	http://amigo.geneontology.org/amigo/term/GO:0010468
positive regulation of cell population proliferation	Gene Ontology	GO:0008284	17	501	0.000231077	0.00606015	ITGAX|EFNB2|NAP1L1|WNT10B|MST1R|PTHLH|MAPK15|INSR|GLI1|HOXA3|TNFRSF11A|CEACAM6|EPCAM|EGFR|SAPCD2|MYC|XBP1	http://amigo.geneontology.org/amigo/term/GO:0008284
nuclear membrane	Gene Ontology	GO:0031965	11	237	0.000245683	0.00636115	STX1A|ITGB4|CLIC1|SLC16A3|EGFR|ALOX5AP|SLC29A2|OSBPL3|PTGDS|SCRN1|POMZP3	http://amigo.geneontology.org/amigo/term/GO:0031965
cellular response to oxidative stress	Gene Ontology	GO:0034599	7	95	0.000250746	0.00643857	SOD1|PRDX6|G6PD|HSPA1A|SLC7A11|PRR5L|PYCR1	http://amigo.geneontology.org/amigo/term/GO:0034599
embryonic skeletal system morphogenesis	Gene Ontology	GO:0048704	5	42	0.000257175	0.00654953	HOXB8|HOXB9|HOXA3|COL11A1|HOXB7	http://amigo.geneontology.org/amigo/term/GO:0048704
collagen binding	Gene Ontology	GO:0005518	6	67	0.000262005	0.00659391	MMP12|COMP|ITGA2|ITGA3|ADGRG1|MMP9	http://amigo.geneontology.org/amigo/term/GO:0005518
protein domain specific binding	Gene Ontology	GO:0019904	11	239	0.000263162	0.00659391	YWHAZ|MLF1|RCC2|ZBTB16|PLAUR|ITGA3|STX1A|VIM|INSR|TNNI3|NR0B2	http://amigo.geneontology.org/amigo/term/GO:0019904
peripheral nervous system myelin maintenance	Gene Ontology	GO:0032287	3	8	0.000270778	0.00667704	PRDX6|FA2H|SOD1	http://amigo.geneontology.org/amigo/term/GO:0032287
positive regulation of collateral sprouting	Gene Ontology	GO:0048672	3	8	0.000270778	0.00667704	EFNA5|SEMA4D|CRABP2	http://amigo.geneontology.org/amigo/term/GO:0048672
kinase binding	Gene Ontology	GO:0019900	7	97	0.000282543	0.00689322	STX1A|SRC|DLG3|IGSF9B|PRKCD|SLC2A1|FLNA	http://amigo.geneontology.org/amigo/term/GO:0019900
protein homodimerization activity	Gene Ontology	GO:0042803	20	660	0.000283982	0.00689322	PDLIM4|WDR54|ZBTB16|MMACHC|SLC11A1|NR0B2|PRTFDC1|G6PD|S100P|TESC|CREB3L3|ADRB2|RIPK2|CEACAM5|UGT1A10|JAML|FLNA|ABCB9|S100A6|PTPRT	http://amigo.geneontology.org/amigo/term/GO:0042803
semaphorin receptor binding	Gene Ontology	GO:0030215	4	23	0.000298693	0.00710609	SEMA3A|SEMA4A|SEMA3E|SEMA4D	http://amigo.geneontology.org/amigo/term/GO:0030215
chloride transmembrane transport	Gene Ontology	GO:1902476	7	98	0.000299613	0.00710609	ANO9|CLIC3|CLIC1|GABRP|SLC26A9|CLDN4|FXYD3	http://amigo.geneontology.org/amigo/term/GO:1902476
platelet aggregation	Gene Ontology	GO:0070527	5	44	0.000313423	0.00737732	COMP|CLIC1|UBASH3B|SLC7A11|FLNA	http://amigo.geneontology.org/amigo/term/GO:0070527
neuronal cell body	Gene Ontology	GO:0043025	14	376	0.000333446	0.00778961	EPHB2|DLG3|IGSF9B|SLC6A6|SOD1|LRP8|RIN1|CHRNA4|SNCG|KCNN4|GAL|ITPR3|PLXDC1|MBL2	http://amigo.geneontology.org/amigo/term/GO:0043025
regulation of insulin secretion	Gene Ontology	GO:0050796	6	71	0.000350389	0.00812433	STX1A|ARNTL|ARL2|SLC2A1|ITPR3|KCNB1	http://amigo.geneontology.org/amigo/term/GO:0050796
identical protein binding	Gene Ontology	GO:0042802	34	1456	0.000356424	0.00817401	STX1A|GNMT|PRDX6|EGFR|RIPK2|PYCR1|CTH|ACCS|YWHAZ|PCDHB8|ZBTB16|ASS1|PFKP|CEACAM5|CEACAM6|S100A4|CLDN4|MTMR2|LDHB|PKM|EPHB2|TRIM29|SOD1|CXCR4|BCAT1|UBASH3B|HGD|OLR1|G6PD|SLC2A1|VIM|ADRB2|FABP5|MMP9	http://amigo.geneontology.org/amigo/term/GO:0042802
positive regulation of epithelial cell proliferation involved in wound healing	Gene Ontology	GO:0060054	3	9	0.000357794	0.00817401	JAML|MMP12|FZD7	http://amigo.geneontology.org/amigo/term/GO:0060054
non-membrane spanning protein tyrosine kinase activity	Gene Ontology	GO:0004715	5	46	0.000378523	0.00858446	SRC|RIPK2|PRKCD|FES|STYK1	http://amigo.geneontology.org/amigo/term/GO:0004715
positive regulation of collagen biosynthetic process	Gene Ontology	GO:0032967	4	25	0.000396573	0.00892865	MYB|ITGA2|CREB3L1|VIM	http://amigo.geneontology.org/amigo/term/GO:0032967
tertiary granule membrane	Gene Ontology	GO:0070821	6	73	0.000402534	0.00899765	ITGAX|OLR1|SLC11A1|SLC2A3|PTAFR|NBEAL2	http://amigo.geneontology.org/amigo/term/GO:0070821
DNA-binding transcription repressor activity, RNA polymerase II-specific	Gene Ontology	GO:0001227	11	253	0.000417414	0.00926361	HOXB8|NFATC4|ZBTB16|MXI1|HMGA2|CREB3L1|OVOL2|MSX1|MYC|YBX3|HOXB13	http://amigo.geneontology.org/amigo/term/GO:0001227
circadian rhythm	Gene Ontology	GO:0007623	6	74	0.00043078	0.00949243	ARNTL|HS3ST2|ASS1|EGFR|NR0B2|CLDN4	http://amigo.geneontology.org/amigo/term/GO:0007623
glycosaminoglycan binding	Gene Ontology	GO:0005539	4	26	0.000453232	0.0097141	PODXL2|VCAN|SPOCK2|SERPINE2	http://amigo.geneontology.org/amigo/term/GO:0005539
negative regulation of axon extension involved in axon guidance	Gene Ontology	GO:0048843	4	26	0.000453232	0.0097141	SEMA3A|SEMA4A|SEMA3E|SEMA4D	http://amigo.geneontology.org/amigo/term/GO:0048843
proximal/distal pattern formation	Gene Ontology	GO:0009954	4	26	0.000453232	0.0097141	HOXB9|GLI1|HOXA11|HOXA10	http://amigo.geneontology.org/amigo/term/GO:0009954
positive regulation of fibroblast proliferation	Gene Ontology	GO:0048146	5	48	0.000453345	0.0097141	SPHK1|S100A6|EGFR|MYC|FOSL2	http://amigo.geneontology.org/amigo/term/GO:0048146
dendritic spine maintenance	Gene Ontology	GO:0097062	3	10	0.000460957	0.0097428	INSR|ITGA3|MTMR2	http://amigo.geneontology.org/amigo/term/GO:0097062
regulation of BMP signaling pathway	Gene Ontology	GO:0030510	3	10	0.000460957	0.0097428	ITGA3|FST|SFRP4	http://amigo.geneontology.org/amigo/term/GO:0030510
caveola	Gene Ontology	GO:0005901	6	76	0.000491893	0.0102571	SRC|LRP8|ATP1B3|SLC2A1|INSR|EFNA5	http://amigo.geneontology.org/amigo/term/GO:0005901
endoplasmic reticulum	Gene Ontology	GO:0005783	26	1018	0.000495465	0.0102627	ZDHHC11B|TPBG|HSPA1A|ALOX5AP|TRIM59|TMEM132A|FURIN|XBP1|CRABP2|ASS1|DISC1|LPCAT4|LPCAT1|ABCB9|GOT1|SGPP2|PRKCD|ITPR3|SAR1B|UGT1A10|FA2H|CREB3L3|CREB3L1|TMTC2|RNF145|NBEAL2	http://amigo.geneontology.org/amigo/term/GO:0005783
positive regulation of interleukin-2 production	Gene Ontology	GO:0032743	4	27	0.000515429	0.0106056	CARD11|RIPK2|RUNX1|CD83	http://amigo.geneontology.org/amigo/term/GO:0032743
ossification	Gene Ontology	GO:0001503	6	77	0.000524875	0.0107289	BMP7|CDH11|COL11A1|EGFR|RUNX1|TNFRSF11A	http://amigo.geneontology.org/amigo/term/GO:0001503
sensory perception of sound	Gene Ontology	GO:0007605	8	144	0.000559454	0.0112872	COL11A1|SOD1|CDH23|MYO1A|ALDH7A1|USH1C|MBL2|MYO7B	http://amigo.geneontology.org/amigo/term/GO:0007605
phosphatidylcholine acyl-chain remodeling	Gene Ontology	GO:0036151	4	28	0.000583463	0.0115193	LPCAT4|PLA2G2D|PLBD1|LPCAT1	http://amigo.geneontology.org/amigo/term/GO:0036151
endodermal cell differentiation	Gene Ontology	GO:0035987	4	28	0.000583463	0.0115193	LAMB1|HMGA2|COL11A1|MMP9	http://amigo.geneontology.org/amigo/term/GO:0035987
cell differentiation	Gene Ontology	GO:0030154	18	596	0.000584807	0.0115193	SRC|PIWIL4|CBX2|SFRP4|STYK1|MECOM|NAP1L1|SPDEF|EGFR|CATSPER1|TESC|RBM38|FST|FES|JAG2|ANXA13|ELF4|MYO7B	http://amigo.geneontology.org/amigo/term/GO:0030154
integral component of postsynaptic density membrane	Gene Ontology	GO:0099061	5	51	0.00058579	0.0115193	NRCAM|EFNB2|SLC16A3|SLITRK3|LRFN4	http://amigo.geneontology.org/amigo/term/GO:0099061
epidermis development	Gene Ontology	GO:0008544	6	80	0.000634219	0.0123932	CRABP2|PTHLH|INSR|FABP5|EVPL|HOXB13	http://amigo.geneontology.org/amigo/term/GO:0008544
adenylate cyclase-activating G protein-coupled receptor signaling pathway	Gene Ontology	GO:0007189	7	113	0.000670803	0.0130261	UTS2|ADCY3|PTHLH|ADGRG1|ADGRL1|LPAR2|ADGRB2	http://amigo.geneontology.org/amigo/term/GO:0007189
cortical actin cytoskeleton	Gene Ontology	GO:0030864	5	53	0.000688931	0.0132951	SHROOM1|MYO1A|SLC2A1|CFL1|MISP	http://amigo.geneontology.org/amigo/term/GO:0030864
neurotransmitter uptake	Gene Ontology	GO:0001504	3	12	0.000720244	0.0138136	SYNGR3|SLC1A7|SLC29A2	http://amigo.geneontology.org/amigo/term/GO:0001504
stem cell differentiation	Gene Ontology	GO:0048863	4	31	0.000825584	0.015546	MSX1|EPOP|HMGA2|EPCAM	http://amigo.geneontology.org/amigo/term/GO:0048863
positive regulation of response to DNA damage stimulus	Gene Ontology	GO:2001022	3	13	0.000878511	0.0163445	MYC|HMGA2|PRKCD	http://amigo.geneontology.org/amigo/term/GO:2001022
chemotaxis	Gene Ontology	GO:0006935	7	119	0.00089504	0.0165529	CCL18|PLAUR|LGALS9|PTAFR|FES|CCR6|CXCR4	http://amigo.geneontology.org/amigo/term/GO:0006935
ephrin receptor signaling pathway	Gene Ontology	GO:0048013	6	86	0.000905219	0.0166421	EPHB2|EFNB2|SRC|ARPC1B|EFNA5|MMP9	http://amigo.geneontology.org/amigo/term/GO:0048013
positive regulation of interleukin-1 beta production	Gene Ontology	GO:0032731	5	57	0.000935225	0.017035	TRIM16|INAVA|LGALS9|RIPK2|NLRP2	http://amigo.geneontology.org/amigo/term/GO:0032731
dendrite	Gene Ontology	GO:0030425	14	420	0.000946586	0.0170991	SEMA3A|EPHB2|IGSF9B|SLC6A6|LRP8|PRSS12|RIN1|TUBB3|CPEB3|PRR7|CHRNA4|KCNB1|MTMR2|PLXDC1	http://amigo.geneontology.org/amigo/term/GO:0030425
microtubule cytoskeleton	Gene Ontology	GO:0015630	8	158	0.000994088	0.0178534	TEKT2|MAP7D2|RASSF1|ARL2|MX2|NAV1|TUBA1C|FES	http://amigo.geneontology.org/amigo/term/GO:0015630
positive regulation of NF-kappaB transcription factor activity	Gene Ontology	GO:0051092	8	159	0.00103328	0.0183452	RAB7B|SPHK1|CARD11|LGALS9|HSPA1A|RIPK2|TNFRSF11A|CTH	http://amigo.geneontology.org/amigo/term/GO:0051092
cAMP response element binding	Gene Ontology	GO:0035497	3	14	0.00105721	0.0185579	CREB3L3|CREB3L1|HMGA2	http://amigo.geneontology.org/amigo/term/GO:0035497
viral entry into host cell	Gene Ontology	GO:0046718	6	89	0.00107034	0.0186542	EFNB2|ITGB6|ITGA2|EGFR|HSPA1A|SLC1A5	http://amigo.geneontology.org/amigo/term/GO:0046718
ficolin-1-rich granule lumen	Gene Ontology	GO:1904813	7	123	0.0010747	0.0186542	HSPA6|AMPD3|IMPDH1|QPCT|HSPA1A|MMP9|PKM	http://amigo.geneontology.org/amigo/term/GO:1904813
positive regulation of interleukin-6 production	Gene Ontology	GO:0032755	6	90	0.00113022	0.0192035	INAVA|RAB7B|LGALS9|RIPK2|XBP1|MBL2	http://amigo.geneontology.org/amigo/term/GO:0032755
myosin complex	Gene Ontology	GO:0016459	4	34	0.00113107	0.0192035	MYO18A|MYO7B|MYO1A|CGN	http://amigo.geneontology.org/amigo/term/GO:0016459
regulation of cell differentiation	Gene Ontology	GO:0045595	4	34	0.00113107	0.0192035	PLEKHB1|RUNX1|FES|SPOCK2	http://amigo.geneontology.org/amigo/term/GO:0045595
glutathione metabolic process	Gene Ontology	GO:0006749	4	34	0.00113107	0.0192035	G6PD|SLC7A11|MMACHC|SOD1	http://amigo.geneontology.org/amigo/term/GO:0006749
molecular_function	Gene Ontology	GO:0003674	20	742	0.00115758	0.0194638	PCNX2|POMZP3|TOMM40L|KRBA1|SLC35F2|PRDX6|LRRC6|SLC6A8|TSPAN3|SCRN1|TMEM205|SPATC1L|CHCHD10|ZNF107|TTC39A|NXPH4|TMEM132A|VGF|LHFPL2|TMEM51	http://amigo.geneontology.org/amigo/term/GO:0003674
positive regulation of osteoblast differentiation	Gene Ontology	GO:0045669	5	60	0.00115893	0.0194638	BMP7|NPNT|WNT10B|CTHRC1|CLIC1	http://amigo.geneontology.org/amigo/term/GO:0045669
heparin binding	Gene Ontology	GO:0008201	8	163	0.0012026	0.0200885	BMP7|COL11A1|COMP|GPNMB|PLA2G2D|ADGRG1|NELL2|SERPINE2	http://amigo.geneontology.org/amigo/term/GO:0008201
skin development	Gene Ontology	GO:0043588	4	35	0.00124839	0.0201362	COMP|GJB3|ITGA3|LTB	http://amigo.geneontology.org/amigo/term/GO:0043588
positive regulation of epithelial cell migration	Gene Ontology	GO:0010634	4	35	0.00124839	0.0201362	SRC|ITGA2|ITGA3|CCR6	http://amigo.geneontology.org/amigo/term/GO:0010634
dorsal/ventral pattern formation	Gene Ontology	GO:0009953	4	35	0.00124839	0.0201362	GLI1|DYNC2H1|OVOL2|HOXA11	http://amigo.geneontology.org/amigo/term/GO:0009953
uterus development	Gene Ontology	GO:0060065	3	15	0.0012573	0.0201362	SRC|HOXA11|HOXA10	http://amigo.geneontology.org/amigo/term/GO:0060065
regulation of intracellular estrogen receptor signaling pathway	Gene Ontology	GO:0033146	3	15	0.0012573	0.0201362	SRC|RUNX1|DNAAF4	http://amigo.geneontology.org/amigo/term/GO:0033146
inner dynein arm assembly	Gene Ontology	GO:0036159	3	15	0.0012573	0.0201362	LRRC6|TEKT2|DNAAF4	http://amigo.geneontology.org/amigo/term/GO:0036159
acetylcholine receptor activity	Gene Ontology	GO:0015464	3	15	0.0012573	0.0201362	CHRNA4|CHRNA5|CHRNA7	http://amigo.geneontology.org/amigo/term/GO:0015464
hematopoietic stem cell proliferation	Gene Ontology	GO:0071425	3	15	0.0012573	0.0201362	MECOM|WNT10B|RUNX1	http://amigo.geneontology.org/amigo/term/GO:0071425
negative regulation of transcription, DNA-templated	Gene Ontology	GO:0045892	16	536	0.00130002	0.0207137	BMP7|SRC|ZBTB16|MECOM|NR0B2|ARNTL|HMGA2|SCG2|HMGA1|HR|CREB3L1|OVOL2|ZNF93|MYB|PAX9|SPINDOC	http://amigo.geneontology.org/amigo/term/GO:0045892
male gonad development	Gene Ontology	GO:0008584	6	93	0.00132533	0.0208481	BIK|LRRC6|HOXA11|HOXA10|INSR|YBX3	http://amigo.geneontology.org/amigo/term/GO:0008584
basement membrane	Gene Ontology	GO:0005604	6	93	0.00132533	0.0208481	ENTPD2|EFNA5|NPNT|TINAG|LAMB1|HMCN2	http://amigo.geneontology.org/amigo/term/GO:0005604
single fertilization	Gene Ontology	GO:0007338	5	62	0.00132859	0.0208481	HOXA10|MST1R|HOXA11|LHFPL2|ADCY3	http://amigo.geneontology.org/amigo/term/GO:0007338
cell-cell adhesion via plasma-membrane adhesion molecules	Gene Ontology	GO:0098742	4	36	0.00137396	0.021029	CDH11|EPCAM|CDH23|CDH17	http://amigo.geneontology.org/amigo/term/GO:0098742
one-carbon metabolic process	Gene Ontology	GO:0006730	4	36	0.00137396	0.021029	ALDH1L1|CA9|GNMT|MTHFD2	http://amigo.geneontology.org/amigo/term/GO:0006730
sulfotransferase activity	Gene Ontology	GO:0008146	4	36	0.00137396	0.021029	GAL3ST1|SULT1A1|HS3ST2|HS3ST1	http://amigo.geneontology.org/amigo/term/GO:0008146
synapse assembly	Gene Ontology	GO:0007416	5	63	0.00141996	0.0215211	NRCAM|PCDHB2|PCDHB9|PCDHB16|SPOCK2	http://amigo.geneontology.org/amigo/term/GO:0007416
biological_process	Gene Ontology	GO:0008150	17	594	0.00144086	0.0217318	PCNX2|NIT1|TLCD3A|TOMM40L|EMILIN2|SLC35F2|SPATC1L|CGN|TSPAN3|TMEM205|KRBA1|TTC39A|POMZP3|TMEM132A|ZNF107|LHFPL2|TMEM51	http://amigo.geneontology.org/amigo/term/GO:0008150
positive regulation of smooth muscle contraction	Gene Ontology	GO:0045987	3	16	0.00147969	0.0220637	NPNT|SPHK1|ITGA2	http://amigo.geneontology.org/amigo/term/GO:0045987
acetylcholine-gated channel complex	Gene Ontology	GO:0005892	3	16	0.00147969	0.0220637	CHRNA4|CHRNA5|CHRNA7	http://amigo.geneontology.org/amigo/term/GO:0005892
external side of plasma membrane	Gene Ontology	GO:0009897	13	392	0.00148417	0.0220637	ITGA3|IL2RG|NRCAM|ITGA2|ITGB6|CHRNA4|INSR|GPC4|TNFRSF11A|CCR6|CXCR4|CD83|TNFRSF18	http://amigo.geneontology.org/amigo/term/GO:0009897
regulation of cell population proliferation	Gene Ontology	GO:0042127	8	169	0.00149728	0.0221019	SRC|STYK1|SLC7A11|FA2H|SMIM22|CDCA7|JAG2|FES	http://amigo.geneontology.org/amigo/term/GO:0042127
glycosaminoglycan biosynthetic process	Gene Ontology	GO:0006024	4	37	0.00150808	0.0221019	GPC4|HS3ST2|HS3ST1|XYLT1	http://amigo.geneontology.org/amigo/term/GO:0006024
positive regulation of cell-substrate adhesion	Gene Ontology	GO:0010811	4	37	0.00150808	0.0221019	NPNT|ARL2|ITGA3|SPOCK2	http://amigo.geneontology.org/amigo/term/GO:0010811
ruffle membrane	Gene Ontology	GO:0032587	6	96	0.00154515	0.0222146	SRC|TESC|PSD3|FERMT1|CFL1|EPS8L3	http://amigo.geneontology.org/amigo/term/GO:0032587
cell-matrix adhesion	Gene Ontology	GO:0007160	6	96	0.00154515	0.0222146	ITGB4|ITGB6|ITGA2|ITGA3|NPNT|FERMT1	http://amigo.geneontology.org/amigo/term/GO:0007160
negative regulation of cell population proliferation	Gene Ontology	GO:0008285	13	394	0.00155009	0.0222146	DLG3|ZBTB16|SFRP4|MUC1|PTHLH|SCG2|TESC|HSPA1A|GPNMB|ADGRG1|MSX1|HMGA1|SERPINE2	http://amigo.geneontology.org/amigo/term/GO:0008285
positive regulation of cold-induced thermogenesis	Gene Ontology	GO:0120162	6	97	0.00162426	0.0230437	MUC1|PTH2R|ADRB2|FABP5|CXCR4|FH	http://amigo.geneontology.org/amigo/term/GO:0120162
cellular response to leukemia inhibitory factor	Gene Ontology	GO:1990830	6	97	0.00162426	0.0230437	PFKP|SPOCK2|NELL2|MYBL2|CTH|XBP1	http://amigo.geneontology.org/amigo/term/GO:1990830
ion channel binding	Gene Ontology	GO:0044325	7	133	0.00164872	0.0232845	YWHAZ|SRC|STX1A|LRRC26|FLNA|KCNB1|PACS1	http://amigo.geneontology.org/amigo/term/GO:0044325
protein-containing complex binding	Gene Ontology	GO:0044877	12	349	0.00166655	0.0234297	EPHB2|STX1A|NR0B2|ITGA2|ADRB2|PRR7|DISC1|INSR|EPCAM|MYC|PFKP|GAD1	http://amigo.geneontology.org/amigo/term/GO:0044877
signaling receptor activity	Gene Ontology	GO:0038023	9	214	0.00170129	0.0237183	ITGAX|ITGB6|PLAUR|TNFRSF11A|CCR6|SLC1A5|NELL2|SEMA4D|GPA33	http://amigo.geneontology.org/amigo/term/GO:0038023
sterol transport	Gene Ontology	GO:0015918	3	17	0.00172525	0.0237183	GRAMD1B|OSBPL7|OSBPL3	http://amigo.geneontology.org/amigo/term/GO:0015918
inner ear receptor cell stereocilium organization	Gene Ontology	GO:0060122	3	17	0.00172525	0.0237183	USH1C|CDH23|CTHRC1	http://amigo.geneontology.org/amigo/term/GO:0060122
negative regulation of anoikis	Gene Ontology	GO:2000811	3	17	0.00172525	0.0237183	SRC|CEACAM5|CEACAM6	http://amigo.geneontology.org/amigo/term/GO:2000811
melanosome	Gene Ontology	GO:0042470	6	99	0.00179166	0.0243584	YWHAZ|NAP1L1|SLC7A11|SLC2A1|ATP1B3|SLC1A5	http://amigo.geneontology.org/amigo/term/GO:0042470
nervous system development	Gene Ontology	GO:0007399	11	305	0.00179248	0.0243584	DOC2A|EPHB2|DCLK1|IGSF9B|PCDHB2|EFNA5|MST1R|NAV1|GAL|LSAMP|IGF2BP3	http://amigo.geneontology.org/amigo/term/GO:0007399
embryonic limb morphogenesis	Gene Ontology	GO:0030326	4	39	0.00180316	0.0243584	BMP7|DYNC2H1|HOXA11|HOXA10	http://amigo.geneontology.org/amigo/term/GO:0030326
cellular response to retinoic acid	Gene Ontology	GO:0071300	5	67	0.00183228	0.0246445	MYB|WNT10B|FZD7|GJB3|TESC	http://amigo.geneontology.org/amigo/term/GO:0071300
ion transport	Gene Ontology	GO:0006811	6	100	0.00188011	0.0251789	TOMM40L|SLC9A2|CHRNA4|KCNN4|SLC26A9|SLC1A7	http://amigo.geneontology.org/amigo/term/GO:0006811
spermatogenesis	Gene Ontology	GO:0007283	13	404	0.0019172	0.0255654	ARNTL|FOXJ1|PIWIL4|SOD1|SPATC1L|GJB3|CATSPER1|HOXA11|HOXA10|JAG2|GLI1|GAL3ST1|YBX3	http://amigo.geneontology.org/amigo/term/GO:0007283
establishment of protein localization	Gene Ontology	GO:0045184	4	40	0.00196472	0.0258244	NPNT|FLNA|ITGA2|RCC2	http://amigo.geneontology.org/amigo/term/GO:0045184
Golgi lumen	Gene Ontology	GO:0005796	6	101	0.00197183	0.0258244	HS3ST1|MUC1|PODXL2|VCAN|GPC4|FURIN	http://amigo.geneontology.org/amigo/term/GO:0005796
retinal ganglion cell axon guidance	Gene Ontology	GO:0031290	3	18	0.00199481	0.0258244	NRCAM|EPHB2|EFNA5	http://amigo.geneontology.org/amigo/term/GO:0031290
toll-like receptor 4 signaling pathway	Gene Ontology	GO:0034142	3	18	0.00199481	0.0258244	LGALS9|RIPK2|S100A14	http://amigo.geneontology.org/amigo/term/GO:0034142
polypeptide N-acetylgalactosaminyltransferase activity	Gene Ontology	GO:0004653	3	18	0.00199481	0.0258244	GALNT14|GALNT7|GALNT12	http://amigo.geneontology.org/amigo/term/GO:0004653
phosphatidylglycerol acyl-chain remodeling	Gene Ontology	GO:0036148	3	18	0.00199481	0.0258244	LPCAT4|PLA2G2D|LPCAT1	http://amigo.geneontology.org/amigo/term/GO:0036148
positive regulation of protein phosphorylation	Gene Ontology	GO:0001934	8	178	0.00204369	0.0263475	PLAUR|EFNA5|EGFR|PRR5L|GPNMB|INSR|MMP9|SEMA4D	http://amigo.geneontology.org/amigo/term/GO:0001934
platelet activation	Gene Ontology	GO:0030168	6	102	0.00206688	0.0265364	YWHAZ|SRC|ENTPD2|PRKCD|ITPR3|FLNA	http://amigo.geneontology.org/amigo/term/GO:0030168
central nervous system development	Gene Ontology	GO:0007417	7	139	0.00209295	0.0267604	B3GNT5|ZBTB16|NRCAM|VCAN|DCLK1|SLC2A1|MBL2	http://amigo.geneontology.org/amigo/term/GO:0007417
amino acid transport	Gene Ontology	GO:0006865	4	41	0.00213602	0.0271992	SLC1A5|SLC7A1|SLC7A11|SLC6A6	http://amigo.geneontology.org/amigo/term/GO:0006865
canonical Wnt signaling pathway	Gene Ontology	GO:0060070	5	70	0.00219448	0.0278296	DISC1|WNT10B|GLI1|SFRP4|FZD7	http://amigo.geneontology.org/amigo/term/GO:0060070
postsynaptic membrane	Gene Ontology	GO:0045211	7	141	0.0022599	0.0283411	PDLIM4|IGSF9B|MX2|GABRP|CHRNA4|CHRNA5|KCNB1	http://amigo.geneontology.org/amigo/term/GO:0045211
protein N-terminus binding	Gene Ontology	GO:0047485	6	104	0.00226733	0.0283411	STX1A|SYNGR3|SCG2|HSPA1A|ALOX5AP|GAD1	http://amigo.geneontology.org/amigo/term/GO:0047485
negative regulation of endoplasmic reticulum stress-induced intrinsic apoptotic signaling pathway	Gene Ontology	GO:1902236	3	19	0.00228915	0.0283411	HSPA1A|CREB3L1|XBP1	http://amigo.geneontology.org/amigo/term/GO:1902236
positive regulation of superoxide anion generation	Gene Ontology	GO:0032930	3	19	0.00228915	0.0283411	EGFR|PRKCD|SOD1	http://amigo.geneontology.org/amigo/term/GO:0032930
cellular response to peptide hormone stimulus	Gene Ontology	GO:0071375	3	19	0.00228915	0.0283411	SRC|SCG2|XBP1	http://amigo.geneontology.org/amigo/term/GO:0071375
cell-cell signaling	Gene Ontology	GO:0007267	9	224	0.00228955	0.0283411	EFNB2|CCL18|GJB3|GPNMB|GJB4|LTB|TNFRSF11A|ADGRG1|PTHLH	http://amigo.geneontology.org/amigo/term/GO:0007267
adherens junction organization	Gene Ontology	GO:0034332	4	42	0.00231734	0.0285714	CDH11|SRC|CDH17|EFNB2	http://amigo.geneontology.org/amigo/term/GO:0034332
endocytosis	Gene Ontology	GO:0006897	8	182	0.00233195	0.0286378	CACNA1I|OLR1|LRP8|PRSS12|RIN1|RHOV|TMPRSS13|APOBR	http://amigo.geneontology.org/amigo/term/GO:0006897
nucleoplasm	Gene Ontology	GO:0005654	64	3630	0.00234225	0.0286511	EPHB2|CDH17|HR|ARL2|SCG2|GJB4|MOCS2|HSPA1A|FABP5|SMC1B|RELT|MYBL2|ELF4|XBP1|YWHAZ|CHD3|CRABP2|MECOM|NR0B2|SOD1|ZNF554|HOXA11|CBX2|ESRP1|GLI1|CDCA7|FOSL2|MSX1|ANXA13|MYB|DOC2A|ARNTL|HOXB8|HOXB9|POMZP3|SAPCD2|ITGB6|HMGA2|CXCR4|EVX1|PRKCD|HMGA1|HDGFL3|HOXB7|DUSP4|STK39|ITPR3|IGF2BP3|HOXC6|MYC|HOXB13|NFIC|AGTRAP|SH3D21|OLR1|MXI1|PFKFB3|TESC|CREB3L3|RUNX1|HOXA3|PTHLH|DCAF8|ARL4A	http://amigo.geneontology.org/amigo/term/GO:0005654
positive regulation of I-kappaB kinase/NF-kappaB signaling	Gene Ontology	GO:0043123	8	185	0.00256833	0.0310498	INAVA|CARD11|LGALS9|RIPK2|S100A4|FLNA|GOT1|CTH	http://amigo.geneontology.org/amigo/term/GO:0043123
axonal fasciculation	Gene Ontology	GO:0007413	3	20	0.00260904	0.0314197	SEMA3A|NRCAM|EPHB2	http://amigo.geneontology.org/amigo/term/GO:0007413
GTP binding	Gene Ontology	GO:0005525	12	373	0.00282299	0.0336054	RAB7B|RAB6D|ARL2|MX2|TUBB3|RHOV|TUBA1C|INSR|ARL14|SAR1B|ARL4C|ARL4A	http://amigo.geneontology.org/amigo/term/GO:0005525
positive regulation of phagocytosis	Gene Ontology	GO:0050766	4	45	0.00292438	0.0340063	SOD1|SLC11A1|MBL2|IL2RG	http://amigo.geneontology.org/amigo/term/GO:0050766
extracellular matrix	Gene Ontology	GO:0031012	9	233	0.00294768	0.0340063	COL11A1|MMP12|COMP|VCAN|SPOCK2|ADAMTS17|HMCN2|ADAMTS18|POMZP3	http://amigo.geneontology.org/amigo/term/GO:0031012
hydrogen peroxide metabolic process	Gene Ontology	GO:0042743	2	5	0.00295119	0.0340063	DUOXA1|EGFR	http://amigo.geneontology.org/amigo/term/GO:0042743
glucose import across plasma membrane	Gene Ontology	GO:0098708	2	5	0.00295119	0.0340063	SLC2A3|SLC2A1	http://amigo.geneontology.org/amigo/term/GO:0098708
1-acylglycerophosphocholine O-acyltransferase activity	Gene Ontology	GO:0047184	2	5	0.00295119	0.0340063	LPCAT4|LPCAT1	http://amigo.geneontology.org/amigo/term/GO:0047184
fructose-2,6-bisphosphate 2-phosphatase activity	Gene Ontology	GO:0004331	2	5	0.00295119	0.0340063	PFKFB3|PFKFB4	http://amigo.geneontology.org/amigo/term/GO:0004331
fructose 2,6-bisphosphate metabolic process	Gene Ontology	GO:0006003	2	5	0.00295119	0.0340063	PFKFB3|PFKFB4	http://amigo.geneontology.org/amigo/term/GO:0006003
trigeminal ganglion development	Gene Ontology	GO:0061551	2	5	0.00295119	0.0340063	SEMA3A|NELL2	http://amigo.geneontology.org/amigo/term/GO:0061551
cell adhesion mediated by integrin	Gene Ontology	GO:0033627	3	21	0.00295517	0.0340063	ITGA2|ITGB4|ITGB6	http://amigo.geneontology.org/amigo/term/GO:0033627
immune response	Gene Ontology	GO:0006955	13	427	0.00303875	0.034711	TNFSF15|IL2RG|CCL18|SEMA4D|CHIT1|ADAMDEC1|LTB|PTAFR|CCR6|CXCR4|MBL2|CRIP1|XBP1	http://amigo.geneontology.org/amigo/term/GO:0006955
liver development	Gene Ontology	GO:0001889	5	76	0.00307122	0.0349534	AACS|XBP1|ASS1|UGT1A10|PKM	http://amigo.geneontology.org/amigo/term/GO:0001889
cytokine-mediated signaling pathway	Gene Ontology	GO:0019221	10	282	0.00319814	0.0362651	YWHAZ|ITGAX|IL2RG|LRP8|STX1A|VIM|PTAFR|MMP9|MYC|MUC1	http://amigo.geneontology.org/amigo/term/GO:0019221
positive regulation of neural precursor cell proliferation	Gene Ontology	GO:2000179	3	22	0.00332822	0.0373313	NAP1L1|ADGRG1|FLNA	http://amigo.geneontology.org/amigo/term/GO:2000179
carbohydrate phosphorylation	Gene Ontology	GO:0046835	3	22	0.00332822	0.0373313	PFKFB3|GALK1|PFKFB4	http://amigo.geneontology.org/amigo/term/GO:0046835
protein localization to plasma membrane	Gene Ontology	GO:0072659	7	152	0.00336926	0.0375552	ABCA12|SLC7A11|ATP1B3|TESC|FLNA|KCNB1|PACS1	http://amigo.geneontology.org/amigo/term/GO:0072659
heterophilic cell-cell adhesion via plasma membrane cell adhesion molecules	Gene Ontology	GO:0007157	4	47	0.00338444	0.0375552	JAML|ADGRL1|CEACAM5|CEACAM6	http://amigo.geneontology.org/amigo/term/GO:0007157
chloride channel complex	Gene Ontology	GO:0034707	4	48	0.00363193	0.0391226	CLIC1|CLDN4|CLIC3|GABRP	http://amigo.geneontology.org/amigo/term/GO:0034707
regulation of protein binding	Gene Ontology	GO:0043393	3	23	0.00372883	0.0391226	SRC|LRRC6|UBASH3B	http://amigo.geneontology.org/amigo/term/GO:0043393
positive regulation of dendrite extension	Gene Ontology	GO:1903861	3	23	0.00372883	0.0391226	RASAL1|CXCR4|UNC13A	http://amigo.geneontology.org/amigo/term/GO:1903861
pyruvate metabolic process	Gene Ontology	GO:0006090	3	23	0.00372883	0.0391226	SLC16A3|SLC7A11|LDHB	http://amigo.geneontology.org/amigo/term/GO:0006090
negative regulation of intrinsic apoptotic signaling pathway	Gene Ontology	GO:2001243	3	23	0.00372883	0.0391226	PLAUR|SRC|MMP9	http://amigo.geneontology.org/amigo/term/GO:2001243
Golgi apparatus	Gene Ontology	GO:0005794	23	1002	0.00379502	0.0391226	ZDHHC11B|RAB6D|ARL2|MAPK15|PTGDS|TMEM132A|B3GNT5|AP3B2|NLRP2|PTHLH|GAL|SELENOM|LPCAT1|RAB7B|VGF|FES|GALNT7|DYNC2H1|PACS1|GALNT14|GALNT12|ADCY3|FUT4	http://amigo.geneontology.org/amigo/term/GO:0005794
endoplasmic reticulum unfolded protein response	Gene Ontology	GO:0030968	4	49	0.0038914	0.0391226	CREB3L3|CREB3L1|CTH|XBP1	http://amigo.geneontology.org/amigo/term/GO:0030968
[heparan sulfate]-glucosamine 3-sulfotransferase 1 activity	Gene Ontology	GO:0008467	2	6	0.00390344	0.0391226	HS3ST2|HS3ST1	http://amigo.geneontology.org/amigo/term/GO:0008467
invadopodium membrane	Gene Ontology	GO:0071438	2	6	0.00390344	0.0391226	PLAUR|ITGA3	http://amigo.geneontology.org/amigo/term/GO:0071438
neural crest cell migration involved in autonomic nervous system development	Gene Ontology	GO:1901166	2	6	0.00390344	0.0391226	SEMA3A|NELL2	http://amigo.geneontology.org/amigo/term/GO:1901166
equilibrioception	Gene Ontology	GO:0050957	2	6	0.00390344	0.0391226	USH1C|CDH23	http://amigo.geneontology.org/amigo/term/GO:0050957
extracellular ligand-gated ion channel activity	Gene Ontology	GO:0005230	2	6	0.00390344	0.0391226	CHRNA7|GABRP	http://amigo.geneontology.org/amigo/term/GO:0005230
galactosylceramide biosynthetic process	Gene Ontology	GO:0006682	2	6	0.00390344	0.0391226	GAL3ST1|FA2H	http://amigo.geneontology.org/amigo/term/GO:0006682
positive regulation of granulocyte differentiation	Gene Ontology	GO:0030854	2	6	0.00390344	0.0391226	RUNX1|TESC	http://amigo.geneontology.org/amigo/term/GO:0030854
neuron recognition	Gene Ontology	GO:0008038	2	6	0.00390344	0.0391226	NTM|CXCR4	http://amigo.geneontology.org/amigo/term/GO:0008038
connexin binding	Gene Ontology	GO:0071253	2	6	0.00390344	0.0391226	SRC|CNST	http://amigo.geneontology.org/amigo/term/GO:0071253
retinoid binding	Gene Ontology	GO:0005501	2	6	0.00390344	0.0391226	PTGDS|CRABP2	http://amigo.geneontology.org/amigo/term/GO:0005501
S-adenosylmethionine metabolic process	Gene Ontology	GO:0046500	2	6	0.00390344	0.0391226	MUC1|GNMT	http://amigo.geneontology.org/amigo/term/GO:0046500
axon ensheathment	Gene Ontology	GO:0008366	2	6	0.00390344	0.0391226	PRDX6|MBL2	http://amigo.geneontology.org/amigo/term/GO:0008366
toll-like receptor 2 signaling pathway	Gene Ontology	GO:0034134	2	6	0.00390344	0.0391226	LGALS9|RIPK2	http://amigo.geneontology.org/amigo/term/GO:0034134
positive regulation of cAMP-dependent protein kinase activity	Gene Ontology	GO:2000481	2	6	0.00390344	0.0391226	SPATC1L|ADRB2	http://amigo.geneontology.org/amigo/term/GO:2000481
negative regulation of stem cell proliferation	Gene Ontology	GO:2000647	2	6	0.00390344	0.0391226	FERMT1|OVOL2	http://amigo.geneontology.org/amigo/term/GO:2000647
positive regulation of neurotransmitter secretion	Gene Ontology	GO:0001956	2	6	0.00390344	0.0391226	STX1A|UNC13A	http://amigo.geneontology.org/amigo/term/GO:0001956
negative regulation of cysteine-type endopeptidase activity involved in apoptotic signaling pathway	Gene Ontology	GO:2001268	2	6	0.00390344	0.0391226	PLAUR|MMP9	http://amigo.geneontology.org/amigo/term/GO:2001268
cellular heat acclimation	Gene Ontology	GO:0070370	2	6	0.00390344	0.0391226	HSPA1A|HSPA6	http://amigo.geneontology.org/amigo/term/GO:0070370
neurotransmitter reuptake	Gene Ontology	GO:0098810	2	6	0.00390344	0.0391226	SLC1A7|SLC29A2	http://amigo.geneontology.org/amigo/term/GO:0098810
positive regulation of alkaline phosphatase activity	Gene Ontology	GO:0010694	2	6	0.00390344	0.0391226	NPNT|ITGA2	http://amigo.geneontology.org/amigo/term/GO:0010694
calmodulin binding	Gene Ontology	GO:0005516	8	200	0.00404455	0.0404065	SPHK1|ADCY3|EGFR|MYO1A|KCNN4|UNC13A|CTH|MBL2	http://amigo.geneontology.org/amigo/term/GO:0005516
regulation of transcription, DNA-templated	Gene Ontology	GO:0006355	19	773	0.00406975	0.0405279	MLF1|ARNTL|CHD3|MYB|ZNF43|ZBTB16|CRABP2|FZD7|HOXB7|ZNF738|HMGA2|ZNF554|HMGA1|KRBOX1|INSR|ZNF267|CDCA7|MYBL2|ZNF761	http://amigo.geneontology.org/amigo/term/GO:0006355
chromatin binding	Gene Ontology	GO:0003682	13	443	0.00409735	0.0406724	GLI1|EPOP|NFATC4|NAP1L1|ASXL3|EGFR|SCG2|HMGA1|MAPK15|CREB3L1|OVOL2|FOSL2|CBX2	http://amigo.geneontology.org/amigo/term/GO:0003682
positive regulation of glycolytic process	Gene Ontology	GO:0045821	3	24	0.0041576	0.0406739	PFKFB3|INSR|PFKFB4	http://amigo.geneontology.org/amigo/term/GO:0045821
regulation of cell morphogenesis	Gene Ontology	GO:0022604	3	24	0.0041576	0.0406739	EFNA5|CLDN4|CFL1	http://amigo.geneontology.org/amigo/term/GO:0022604
glucose transmembrane transport	Gene Ontology	GO:1904659	3	24	0.0041576	0.0406739	SLC2A3|SLC2A12|SLC2A1	http://amigo.geneontology.org/amigo/term/GO:1904659
memory	Gene Ontology	GO:0007613	5	82	0.00417604	0.0406739	ITPR3|INSR|ITGA3|RIN1|EIF4EBP2	http://amigo.geneontology.org/amigo/term/GO:0007613
G protein-coupled receptor signaling pathway	Gene Ontology	GO:0007186	25	1132	0.00421237	0.0408995	GPR17|INSR|PTAFR|CCR6|GPR35|PREX2|FZD7|GPRC5A|PTHLH|PDE7A|GAL|CXCR4|ADGRB2|UTS2|SRC|ENTPD2|PTH2R|ADGRL1|ITPR3|ADCY3|CCL18|NPB|ADRB2|ADGRG1|LPAR2	http://amigo.geneontology.org/amigo/term/GO:0007186
ubiquitin protein ligase binding	Gene Ontology	GO:0031625	10	294	0.00424165	0.0410555	YWHAZ|SRC|DLG3|UBASH3B|HSPA6|PRDX6|EGFR|PRR5L|HSPA1A|CXCR4	http://amigo.geneontology.org/amigo/term/GO:0031625
response to hypoxia	Gene Ontology	GO:0001666	7	160	0.00440662	0.0425172	MYB|ITGA2|SLC2A1|CHRNA4|CXCR4|AGTRAP|PKM	http://amigo.geneontology.org/amigo/term/GO:0001666
nervous system process	Gene Ontology	GO:0050877	4	51	0.0044474	0.0425172	CHRNA4|CHRNA5|CHRNA7|GABRP	http://amigo.geneontology.org/amigo/term/GO:0050877
neurotransmitter secretion	Gene Ontology	GO:0007269	4	51	0.0044474	0.0425172	STX1A|PPFIA4|GAD1|UNC13A	http://amigo.geneontology.org/amigo/term/GO:0007269
cellular response to amino acid stimulus	Gene Ontology	GO:0071230	4	51	0.0044474	0.0425172	ASS1|EGFR|CPEB3|XBP1	http://amigo.geneontology.org/amigo/term/GO:0071230
early endosome membrane	Gene Ontology	GO:0031901	7	161	0.00455153	0.0428032	PDLIM4|RCC2|SPHK1|EGFR|GPNMB|KREMEN2|MTMR2	http://amigo.geneontology.org/amigo/term/GO:0031901
metal ion binding	Gene Ontology	GO:0046872	43	2298	0.00457752	0.0428032	COL11A1|AMPD3|ITGA2|ITGA3|OVOL2|ADAMTS17|RASAL1|ADAMTS18|NELL2|FURIN|ZBTB16|MECOM|HPDL|ASXL3|CPNE7|IMPDH1|PFKP|PDE7A|HR|ZNF554|ZNF267|TNNI3|HGD|ZNF107|LFNG|ZNF761|PDLIM4|RHOV|ZNF43|ZNF683|PRKCD|XYLT1|TNFRSF11A|SAR1B|GALNT7|NT5DC2|ITGAX|GALNT14|GALNT12|ADCY3|PDE6B|SLC1A5|GLI1	http://amigo.geneontology.org/amigo/term/GO:0046872
female pregnancy	Gene Ontology	GO:0007565	5	84	0.00460017	0.0428032	LGALS9|ITGA2|CLDN4|PTHLH|SLC2A1	http://amigo.geneontology.org/amigo/term/GO:0007565
regulation of cell cycle	Gene Ontology	GO:0051726	6	121	0.00461293	0.0428032	ARNTL|CLIC1|MECOM|MX2|SMIM22|MYBL2	http://amigo.geneontology.org/amigo/term/GO:0051726
fatty acid binding	Gene Ontology	GO:0005504	3	25	0.00461509	0.0428032	FABP5|PTGDS|CYP4F11	http://amigo.geneontology.org/amigo/term/GO:0005504
synaptic transmission, cholinergic	Gene Ontology	GO:0007271	3	25	0.00461509	0.0428032	CHRNA4|CHRNA5|CHRNA7	http://amigo.geneontology.org/amigo/term/GO:0007271
establishment of skin barrier	Gene Ontology	GO:0061436	3	25	0.00461509	0.0428032	ABCA12|CLDN4|FA2H	http://amigo.geneontology.org/amigo/term/GO:0061436
synaptic vesicle exocytosis	Gene Ontology	GO:0016079	3	25	0.00461509	0.0428032	DOC2A|SYT8|STX1A	http://amigo.geneontology.org/amigo/term/GO:0016079
retinoic acid binding	Gene Ontology	GO:0001972	3	25	0.00461509	0.0428032	FABP5|UGT1A10|CRABP2	http://amigo.geneontology.org/amigo/term/GO:0001972
phosphatidylethanolamine acyl-chain remodeling	Gene Ontology	GO:0036152	3	25	0.00461509	0.0428032	LPCAT4|PLA2G2D|PLBD1	http://amigo.geneontology.org/amigo/term/GO:0036152
sphingolipid biosynthetic process	Gene Ontology	GO:0030148	4	52	0.00474445	0.043872	SPHK1|DEGS2|FA2H|SGPP2	http://amigo.geneontology.org/amigo/term/GO:0030148
voltage-gated potassium channel complex	Gene Ontology	GO:0008076	5	85	0.00482332	0.0439447	STX1A|LRRC26|KCNB1|KCNN4|KCNF1	http://amigo.geneontology.org/amigo/term/GO:0008076
positive regulation of ERK1 and ERK2 cascade	Gene Ontology	GO:0070374	8	207	0.00492477	0.0439447	SRC|CCL18|EGFR|GPNMB|NPNT|LGALS9|RIPK2|ARHGAP8	http://amigo.geneontology.org/amigo/term/GO:0070374
DNA binding	Gene Ontology	GO:0003677	26	1209	0.00496186	0.0439447	SPHK1|TRIM16|ARNTL|MYO18A|CBX2|XBP1|MLF1|CHD3|ZBTB16|MECOM|ASXL3|IMPDH1|ZNF267|ZNF107|ZNF761|FOXJ1|SMC1B|ZNF43|ZNF683|HMGA2|HMGA1|MYC|MXI1|ZNF738|ZNF93|GLI1	http://amigo.geneontology.org/amigo/term/GO:0003677
activation of MAPK activity	Gene Ontology	GO:0000187	6	123	0.00497513	0.0439447	INAVA|SOD1|INSR|RIPK2|CXCR4|STK39	http://amigo.geneontology.org/amigo/term/GO:0000187
potassium ion transmembrane transport	Gene Ontology	GO:0071805	6	123	0.00497513	0.0439447	SLC9A2|ATP1B3|KCNF1|LRRC26|KCNN4|KCNB1	http://amigo.geneontology.org/amigo/term/GO:0071805
lipid modification	Gene Ontology	GO:0030258	2	7	0.00497861	0.0439447	LPCAT4|FA2H	http://amigo.geneontology.org/amigo/term/GO:0030258
behavioral response to nicotine	Gene Ontology	GO:0035095	2	7	0.00497861	0.0439447	CHRNA4|CHRNA5	http://amigo.geneontology.org/amigo/term/GO:0035095
positive regulation of dendritic cell chemotaxis	Gene Ontology	GO:2000510	2	7	0.00497861	0.0439447	LGALS9|CCR6	http://amigo.geneontology.org/amigo/term/GO:2000510
positive regulation of receptor binding	Gene Ontology	GO:1900122	2	7	0.00497861	0.0439447	HOXA3|MMP9	http://amigo.geneontology.org/amigo/term/GO:1900122
regulation of type B pancreatic cell proliferation	Gene Ontology	GO:0061469	2	7	0.00497861	0.0439447	SCG2|SGPP2	http://amigo.geneontology.org/amigo/term/GO:0061469
mesenchymal cell differentiation	Gene Ontology	GO:0048762	2	7	0.00497861	0.0439447	BMP7|HMGA2	http://amigo.geneontology.org/amigo/term/GO:0048762
positive regulation of cysteine-type endopeptidase activity involved in apoptotic signaling pathway	Gene Ontology	GO:2001269	2	7	0.00497861	0.0439447	LGALS9|PRR7	http://amigo.geneontology.org/amigo/term/GO:2001269
C-X-C chemokine receptor activity	Gene Ontology	GO:0016494	2	7	0.00497861	0.0439447	GPR35|CXCR4	http://amigo.geneontology.org/amigo/term/GO:0016494
creatine metabolic process	Gene Ontology	GO:0006600	2	7	0.00497861	0.0439447	SLC6A8|CKMT1A	http://amigo.geneontology.org/amigo/term/GO:0006600
axon extension involved in axon guidance	Gene Ontology	GO:0048846	2	7	0.00497861	0.0439447	SEMA3A|NELL2	http://amigo.geneontology.org/amigo/term/GO:0048846
protein phosphatase binding	Gene Ontology	GO:0019903	5	86	0.00505405	0.0442379	PDLIM4|DLG3|KCNN4|EGFR|PTPRT	http://amigo.geneontology.org/amigo/term/GO:0019903
positive regulation of peptidyl-tyrosine phosphorylation	Gene Ontology	GO:0050731	5	86	0.00505405	0.0442379	SRC|LRP8|RIPK2|SEMA4D|EFNA5	http://amigo.geneontology.org/amigo/term/GO:0050731
microvillus membrane	Gene Ontology	GO:0031528	3	26	0.00510184	0.0445265	CA9|SLC6A6|S100P	http://amigo.geneontology.org/amigo/term/GO:0031528
ion transmembrane transport	Gene Ontology	GO:0034220	8	209	0.00520134	0.0452677	FXYD3|ATP1B3|GABRP|CHRNA4|CHRNA5|CHRNA7|S100A6|ANO9	http://amigo.geneontology.org/amigo/term/GO:0034220
transmembrane receptor protein tyrosine kinase activity	Gene Ontology	GO:0004714	4	54	0.00537791	0.0466737	EPHB2|EGFR|INSR|MST1R	http://amigo.geneontology.org/amigo/term/GO:0004714
protein-containing complex	Gene Ontology	GO:0032991	16	623	0.00541405	0.0468564	CNST|TOMM40L|ZBTB16|SOD1|COMP|EGFR|SCG2|HOXA11|SLC7A1|HSPA1A|RIPK2|NR0B2|CXCR4|MYC|GOT1|MBL2	http://amigo.geneontology.org/amigo/term/GO:0032991
canonical glycolysis	Gene Ontology	GO:0061621	3	27	0.00561835	0.0480888	ENO2|PFKP|PKM	http://amigo.geneontology.org/amigo/term/GO:0061621
response to organic substance	Gene Ontology	GO:0010033	3	27	0.00561835	0.0480888	CRIP1|S100P|SOD1	http://amigo.geneontology.org/amigo/term/GO:0010033
ephrin receptor binding	Gene Ontology	GO:0046875	3	27	0.00561835	0.0480888	EFNB2|SRC|EFNA5	http://amigo.geneontology.org/amigo/term/GO:0046875
focal adhesion assembly	Gene Ontology	GO:0048041	3	27	0.00561835	0.0480888	SRC|ITGA2|RCC2	http://amigo.geneontology.org/amigo/term/GO:0048041
kinase activity	Gene Ontology	GO:0016301	5	89	0.00579304	0.0490571	SRC|STK39|MAPK15|CKMT1A|PKM	http://amigo.geneontology.org/amigo/term/GO:0016301
protein tyrosine kinase activity	Gene Ontology	GO:0004713	5	89	0.00579304	0.0490571	EPHB2|SRC|INSR|EGFR|FES	http://amigo.geneontology.org/amigo/term/GO:0004713
MAPK cascade	Gene Ontology	GO:0000165	9	261	0.00598658	0.0490571	DLG3|IL2RG|EGFR|RASGEF1A|SCG2|MAPK15|RASAL1|MYC|MBL2	http://amigo.geneontology.org/amigo/term/GO:0000165
protein autophosphorylation	Gene Ontology	GO:0046777	7	170	0.00602275	0.0490571	SRC|EGFR|MAPK15|INSR|FES|STK39|STK17B	http://amigo.geneontology.org/amigo/term/GO:0046777
calcium-dependent phospholipid binding	Gene Ontology	GO:0005544	4	56	0.00606553	0.0490571	DOC2A|SYT8|ANXA13|CPNE7	http://amigo.geneontology.org/amigo/term/GO:0005544
clathrin-coated vesicle membrane	Gene Ontology	GO:0030665	4	56	0.00606553	0.0490571	AP1M2|ADRB2|AP3B2|EGFR	http://amigo.geneontology.org/amigo/term/GO:0030665
positive regulation of release of cytochrome c from mitochondria	Gene Ontology	GO:0090200	3	28	0.00616509	0.0490571	PLAUR|BIK|MMP9	http://amigo.geneontology.org/amigo/term/GO:0090200
regulation of mitochondrial membrane potential	Gene Ontology	GO:0051881	3	28	0.00616509	0.0490571	PYCR1|SOD1|CLIC1	http://amigo.geneontology.org/amigo/term/GO:0051881
extracellular matrix binding	Gene Ontology	GO:0050840	3	28	0.00616509	0.0490571	SPOCK2|COL11A1|ADGRG1	http://amigo.geneontology.org/amigo/term/GO:0050840
regulation of dopamine secretion	Gene Ontology	GO:0014059	3	28	0.00616509	0.0490571	SYT8|CHRNA4|SNCG	http://amigo.geneontology.org/amigo/term/GO:0014059
neurotransmitter transport	Gene Ontology	GO:0006836	3	28	0.00616509	0.0490571	SLC6A8|SLC29A2|SLC6A6	http://amigo.geneontology.org/amigo/term/GO:0006836
cellular response to virus	Gene Ontology	GO:0098586	3	28	0.00616509	0.0490571	LGALS9|LGALS8|MMP12	http://amigo.geneontology.org/amigo/term/GO:0098586
positive regulation of leukocyte tethering or rolling	Gene Ontology	GO:1903238	2	8	0.00617358	0.0490571	FUT4|PTAFR	http://amigo.geneontology.org/amigo/term/GO:1903238
epidermal cell differentiation	Gene Ontology	GO:0009913	2	8	0.00617358	0.0490571	GLI1|OVOL2	http://amigo.geneontology.org/amigo/term/GO:0009913
response to gravity	Gene Ontology	GO:0009629	2	8	0.00617358	0.0490571	STX1A|PKM	http://amigo.geneontology.org/amigo/term/GO:0009629
sphingosine metabolic process	Gene Ontology	GO:0006670	2	8	0.00617358	0.0490571	SPHK1|SGPP2	http://amigo.geneontology.org/amigo/term/GO:0006670
positive regulation of cytoplasmic translation	Gene Ontology	GO:2000767	2	8	0.00617358	0.0490571	YBX3|PKM	http://amigo.geneontology.org/amigo/term/GO:2000767
positive regulation of transforming growth factor beta production	Gene Ontology	GO:0071636	2	8	0.00617358	0.0490571	LGALS9|MYB	http://amigo.geneontology.org/amigo/term/GO:0071636
cellular hyperosmotic response	Gene Ontology	GO:0071474	2	8	0.00617358	0.0490571	YBX3|SLC2A1	http://amigo.geneontology.org/amigo/term/GO:0071474
ossification involved in bone maturation	Gene Ontology	GO:0043931	2	8	0.00617358	0.0490571	SEMA4D|XYLT1	http://amigo.geneontology.org/amigo/term/GO:0043931
regulation of chemotaxis	Gene Ontology	GO:0050920	2	8	0.00617358	0.0490571	EFNB2|CXCR4	http://amigo.geneontology.org/amigo/term/GO:0050920
exocrine pancreas development	Gene Ontology	GO:0031017	2	8	0.00617358	0.0490571	INSR|XBP1	http://amigo.geneontology.org/amigo/term/GO:0031017
minor groove of adenine-thymine-rich DNA binding	Gene Ontology	GO:0003680	2	8	0.00617358	0.0490571	HMGA2|HMGA1	http://amigo.geneontology.org/amigo/term/GO:0003680
L-ascorbic acid metabolic process	Gene Ontology	GO:0019852	2	8	0.00617358	0.0490571	SLC2A3|SLC2A1	http://amigo.geneontology.org/amigo/term/GO:0019852
nucleotide-binding oligomerization domain containing 2 signaling pathway	Gene Ontology	GO:0070431	2	8	0.00617358	0.0490571	INAVA|RIPK2	http://amigo.geneontology.org/amigo/term/GO:0070431
inner ear morphogenesis	Gene Ontology	GO:0042472	4	57	0.00643024	0.0508365	EPHB2|USH1C|COL11A1|TIFAB	http://amigo.geneontology.org/amigo/term/GO:0042472
positive regulation of transforming growth factor beta receptor signaling pathway	Gene Ontology	GO:0030511	3	29	0.0067425	0.0530353	NPNT|FERMT1|SCG2	http://amigo.geneontology.org/amigo/term/GO:0030511
catenin complex	Gene Ontology	GO:0016342	3	29	0.0067425	0.0530353	CDH11|CDH23|CDH17	http://amigo.geneontology.org/amigo/term/GO:0016342
positive regulation of smooth muscle cell proliferation	Gene Ontology	GO:0048661	4	58	0.00680921	0.0532902	EGFR|ITGA2|MYB|PTAFR	http://amigo.geneontology.org/amigo/term/GO:0048661
cellular response to growth factor stimulus	Gene Ontology	GO:0071363	4	59	0.00720266	0.0556994	LRP8|INSR|PAX9|SPHK1	http://amigo.geneontology.org/amigo/term/GO:0071363
integral component of presynaptic membrane	Gene Ontology	GO:0099056	4	59	0.00720266	0.0556994	EPHB2|EFNB2|CHRNA4|STX1A	http://amigo.geneontology.org/amigo/term/GO:0099056
regulation of synaptic transmission, glutamatergic	Gene Ontology	GO:0051966	3	30	0.00735099	0.0556994	DISC1|SERPINE2|UNC13A	http://amigo.geneontology.org/amigo/term/GO:0051966
positive regulation of DNA binding	Gene Ontology	GO:0043388	3	30	0.00735099	0.0556994	PLAUR|ITGA2|MMP9	http://amigo.geneontology.org/amigo/term/GO:0043388
ERK1 and ERK2 cascade	Gene Ontology	GO:0070371	3	30	0.00735099	0.0556994	YWHAZ|LGALS9|MYC	http://amigo.geneontology.org/amigo/term/GO:0070371
adipose tissue development	Gene Ontology	GO:0060612	3	30	0.00735099	0.0556994	AACS|SELENOM|XBP1	http://amigo.geneontology.org/amigo/term/GO:0060612
glutamate secretion	Gene Ontology	GO:0014047	3	30	0.00735099	0.0556994	STX1A|PPFIA4|SLC1A7	http://amigo.geneontology.org/amigo/term/GO:0014047
Wnt-protein binding	Gene Ontology	GO:0017147	3	30	0.00735099	0.0556994	CTHRC1|SFRP4|FZD7	http://amigo.geneontology.org/amigo/term/GO:0017147
response to nicotine	Gene Ontology	GO:0035094	3	30	0.00735099	0.0556994	CHRNA4|CHRNA5|SLC7A11	http://amigo.geneontology.org/amigo/term/GO:0035094
positive regulation of peptidyl-threonine phosphorylation	Gene Ontology	GO:0010800	3	30	0.00735099	0.0556994	BMP7|SPHK1|RIPK2	http://amigo.geneontology.org/amigo/term/GO:0010800
central nervous system projection neuron axonogenesis	Gene Ontology	GO:0021952	2	9	0.00748531	0.0556994	EPHB2|DCLK1	http://amigo.geneontology.org/amigo/term/GO:0021952
glycolipid biosynthetic process	Gene Ontology	GO:0009247	2	9	0.00748531	0.0556994	B3GNT5|SCCPDH	http://amigo.geneontology.org/amigo/term/GO:0009247
sensory perception of light stimulus	Gene Ontology	GO:0050953	2	9	0.00748531	0.0556994	USH1C|CDH23	http://amigo.geneontology.org/amigo/term/GO:0050953
troponin complex	Gene Ontology	GO:0005861	2	9	0.00748531	0.0556994	TNNT1|TNNI3	http://amigo.geneontology.org/amigo/term/GO:0005861
cellular response to muramyl dipeptide	Gene Ontology	GO:0071225	2	9	0.00748531	0.0556994	RIPK2|VIM	http://amigo.geneontology.org/amigo/term/GO:0071225
marginal zone B cell differentiation	Gene Ontology	GO:0002315	2	9	0.00748531	0.0556994	LFNG|CDH17	http://amigo.geneontology.org/amigo/term/GO:0002315
sympathetic ganglion development	Gene Ontology	GO:0061549	2	9	0.00748531	0.0556994	SEMA3A|NELL2	http://amigo.geneontology.org/amigo/term/GO:0061549
facial nerve structural organization	Gene Ontology	GO:0021612	2	9	0.00748531	0.0556994	SEMA3A|NELL2	http://amigo.geneontology.org/amigo/term/GO:0021612
surfactant homeostasis	Gene Ontology	GO:0043129	2	9	0.00748531	0.0556994	ABCA12|LPCAT1	http://amigo.geneontology.org/amigo/term/GO:0043129
cellular response to interferon-gamma	Gene Ontology	GO:0071346	5	95	0.00749352	0.0556994	CCL18|RAB7B|LGALS9|ASS1|VIM	http://amigo.geneontology.org/amigo/term/GO:0071346
modulation of chemical synaptic transmission	Gene Ontology	GO:0050804	4	60	0.00761081	0.0561681	CDH11|LRP8|SLC7A11|EIF4EBP2	http://amigo.geneontology.org/amigo/term/GO:0050804
cellular response to glucose stimulus	Gene Ontology	GO:0071333	4	60	0.00761081	0.0561681	AACS|KCNB1|SCG2|XBP1	http://amigo.geneontology.org/amigo/term/GO:0071333
cellular iron ion homeostasis	Gene Ontology	GO:0006879	4	60	0.00761081	0.0561681	HEPH|MYC|SOD1|SLC11A1	http://amigo.geneontology.org/amigo/term/GO:0006879
ficolin-1-rich granule membrane	Gene Ontology	GO:0101003	4	61	0.00803388	0.0588709	ITGAX|SLC2A3|NBEAL2|SLC11A1	http://amigo.geneontology.org/amigo/term/GO:0101003
lipid transport	Gene Ontology	GO:0006869	4	61	0.00803388	0.0588709	GULP1|ABCA12|ABCA3|APOBR	http://amigo.geneontology.org/amigo/term/GO:0006869
extracellular matrix structural constituent	Gene Ontology	GO:0005201	6	137	0.00811983	0.0590191	COL11A1|COMP|NPNT|LAMB1|HMCN2|CTHRC1	http://amigo.geneontology.org/amigo/term/GO:0005201
oxidoreductase activity	Gene Ontology	GO:0016491	6	137	0.00811983	0.0590191	HR|SCCPDH|MMACHC|SELENOM|HEPH|IL4I1	http://amigo.geneontology.org/amigo/term/GO:0016491
regulation of cell migration	Gene Ontology	GO:0030334	5	97	0.00813009	0.0590191	FLNA|RCC2|TMSB10|SERPINE2|PHLDA2	http://amigo.geneontology.org/amigo/term/GO:0030334
positive regulation of Rho protein signal transduction	Gene Ontology	GO:0035025	3	32	0.00866269	0.0622155	GPR17|GPR35|ADGRG1	http://amigo.geneontology.org/amigo/term/GO:0035025
regulation of presynapse assembly	Gene Ontology	GO:1905606	3	32	0.00866269	0.0622155	GPC4|SLITRK3|LRFN4	http://amigo.geneontology.org/amigo/term/GO:1905606
protein stabilization	Gene Ontology	GO:0050821	7	183	0.00873888	0.0622155	WNT10B|ATP1B3|TESC|HSPA1A|MSX1|FLNA|PRKCD	http://amigo.geneontology.org/amigo/term/GO:0050821
secretory granule membrane	Gene Ontology	GO:0030667	5	99	0.00880321	0.0622155	ITGAX|ITPR3|FABP5|PTAFR|SLC2A3	http://amigo.geneontology.org/amigo/term/GO:0030667
proteolysis	Gene Ontology	GO:0006508	12	434	0.00881237	0.0622155	MMP12|OLR1|LRP8|CXCR4|ADAMDEC1|TMPRSS13|PIGS|TINAG|ADAMTS17|MMP9|ADAMTS18|SCRN1	http://amigo.geneontology.org/amigo/term/GO:0006508
lipid droplet formation	Gene Ontology	GO:0140042	2	10	0.00891082	0.0622155	SMIM22|TMEM159	http://amigo.geneontology.org/amigo/term/GO:0140042
tumor necrosis factor-activated receptor activity	Gene Ontology	GO:0005031	2	10	0.00891082	0.0622155	TNFRSF11A|TNFRSF18	http://amigo.geneontology.org/amigo/term/GO:0005031
intestinal epithelial cell development	Gene Ontology	GO:0060576	2	10	0.00891082	0.0622155	SRC|SPDEF	http://amigo.geneontology.org/amigo/term/GO:0060576
chondrocyte proliferation	Gene Ontology	GO:0035988	2	10	0.00891082	0.0622155	COMP|HMGA2	http://amigo.geneontology.org/amigo/term/GO:0035988
positive regulation of megakaryocyte differentiation	Gene Ontology	GO:0045654	2	10	0.00891082	0.0622155	RAB7B|TESC	http://amigo.geneontology.org/amigo/term/GO:0045654
midgut development	Gene Ontology	GO:0007494	2	10	0.00891082	0.0622155	ASS1|EGFR	http://amigo.geneontology.org/amigo/term/GO:0007494
regulation of dendritic spine development	Gene Ontology	GO:0060998	2	10	0.00891082	0.0622155	DISC1|CPEB3	http://amigo.geneontology.org/amigo/term/GO:0060998
insulin receptor substrate binding	Gene Ontology	GO:0043560	2	10	0.00891082	0.0622155	INSR|PRKCD	http://amigo.geneontology.org/amigo/term/GO:0043560
fructose metabolic process	Gene Ontology	GO:0006000	2	10	0.00891082	0.0622155	PFKFB3|PFKFB4	http://amigo.geneontology.org/amigo/term/GO:0006000
positive regulation of synaptic plasticity	Gene Ontology	GO:0031915	2	10	0.00891082	0.0622155	EPHB2|UNC13A	http://amigo.geneontology.org/amigo/term/GO:0031915
embryonic skeletal joint morphogenesis	Gene Ontology	GO:0060272	2	10	0.00891082	0.0622155	BMP7|HOXA11	http://amigo.geneontology.org/amigo/term/GO:0060272
late endosome	Gene Ontology	GO:0005770	6	140	0.00894552	0.0623178	SRC|RAB7B|SLC11A1|INSR|CXCR4|SMIM22	http://amigo.geneontology.org/amigo/term/GO:0005770
blood microparticle	Gene Ontology	GO:0072562	6	141	0.00923362	0.0641012	YWHAZ|HSPA6|CLIC1|SLC2A1|TMPRSS13|HSPA1A	http://amigo.geneontology.org/amigo/term/GO:0072562
odontogenesis	Gene Ontology	GO:0042476	3	33	0.00936657	0.0641012	LAMB1|SRC|PAX9	http://amigo.geneontology.org/amigo/term/GO:0042476
limb development	Gene Ontology	GO:0060173	3	33	0.00936657	0.0641012	COMP|SLC7A11|KREMEN2	http://amigo.geneontology.org/amigo/term/GO:0060173
embryonic forelimb morphogenesis	Gene Ontology	GO:0035115	3	33	0.00936657	0.0641012	MSX1|CRABP2|HOXA11	http://amigo.geneontology.org/amigo/term/GO:0035115
insulin secretion	Gene Ontology	GO:0030073	3	33	0.00936657	0.0641012	STX1A|VGF|GAL	http://amigo.geneontology.org/amigo/term/GO:0030073
response to interleukin-1	Gene Ontology	GO:0070555	3	33	0.00936657	0.0641012	SRC|LGALS9|TNFRSF11A	http://amigo.geneontology.org/amigo/term/GO:0070555
extrinsic component of cytoplasmic side of plasma membrane	Gene Ontology	GO:0031234	4	65	0.00987961	0.0670486	SRC|S100A6|FES|STYK1	http://amigo.geneontology.org/amigo/term/GO:0031234
anchored component of membrane	Gene Ontology	GO:0031225	5	102	0.00988358	0.0670486	NTM|PLAUR|CEACAM5|LSAMP|CEACAM6	http://amigo.geneontology.org/amigo/term/GO:0031225
protein localization to nucleus	Gene Ontology	GO:0034504	3	34	0.0101029	0.0670679	BMP7|MSX1|ZBTB16	http://amigo.geneontology.org/amigo/term/GO:0034504
phosphatidylcholine biosynthetic process	Gene Ontology	GO:0006656	3	34	0.0101029	0.0670679	MUC1|FABP5|LPCAT1	http://amigo.geneontology.org/amigo/term/GO:0006656
cytoplasmic vesicle membrane	Gene Ontology	GO:0030659	6	144	0.0101376	0.0670679	AP1M2|VOPP1|MFSD10|ITPR3|AGTRAP|GPRC5A	http://amigo.geneontology.org/amigo/term/GO:0030659
heart development	Gene Ontology	GO:0007507	7	189	0.0102573	0.0670679	PDLIM4|FOXJ1|NFATC4|DNAAF4|ITGA3|TNNI3|CRIP1	http://amigo.geneontology.org/amigo/term/GO:0007507
activation of protein kinase activity	Gene Ontology	GO:0032147	4	66	0.0103804	0.0670679	INSR|GPRC5A|PRKCD|SLC11A1	http://amigo.geneontology.org/amigo/term/GO:0032147
extracellular matrix disassembly	Gene Ontology	GO:0022617	4	66	0.0103804	0.0670679	FURIN|SLC7A11|MMP12|MMP9	http://amigo.geneontology.org/amigo/term/GO:0022617
regulation of blood pressure	Gene Ontology	GO:0008217	4	66	0.0103804	0.0670679	UTS2|STK39|AGTRAP|SOD1	http://amigo.geneontology.org/amigo/term/GO:0008217
L-phenylalanine catabolic process	Gene Ontology	GO:0006559	2	11	0.0104472	0.0670679	IL4I1|HGD	http://amigo.geneontology.org/amigo/term/GO:0006559
RAGE receptor binding	Gene Ontology	GO:0050786	2	11	0.0104472	0.0670679	S100A4|S100P	http://amigo.geneontology.org/amigo/term/GO:0050786
response to redox state	Gene Ontology	GO:0051775	2	11	0.0104472	0.0670679	ARNTL|SLC7A11	http://amigo.geneontology.org/amigo/term/GO:0051775
positive regulation of transcription from RNA polymerase II promoter in response to endoplasmic reticulum stress	Gene Ontology	GO:1990440	2	11	0.0104472	0.0670679	CREB3L3|CREB3L1	http://amigo.geneontology.org/amigo/term/GO:1990440
mesonephros development	Gene Ontology	GO:0001823	2	11	0.0104472	0.0670679	BMP7|ZBTB16	http://amigo.geneontology.org/amigo/term/GO:0001823
regulation of cell-cell adhesion	Gene Ontology	GO:0022407	2	11	0.0104472	0.0670679	SRC|EFNA5	http://amigo.geneontology.org/amigo/term/GO:0022407
keratinocyte proliferation	Gene Ontology	GO:0043616	2	11	0.0104472	0.0670679	FERMT1|FST	http://amigo.geneontology.org/amigo/term/GO:0043616
regulation of neuroinflammatory response	Gene Ontology	GO:0150077	2	11	0.0104472	0.0670679	SPHK1|MMP9	http://amigo.geneontology.org/amigo/term/GO:0150077
regulation of postsynaptic membrane neurotransmitter receptor levels	Gene Ontology	GO:0099072	2	11	0.0104472	0.0670679	EFNB2|DLG3	http://amigo.geneontology.org/amigo/term/GO:0099072
cellular response to forskolin	Gene Ontology	GO:1904322	2	11	0.0104472	0.0670679	EFNA5|ADCY3	http://amigo.geneontology.org/amigo/term/GO:1904322
synaptic vesicle docking	Gene Ontology	GO:0016081	2	11	0.0104472	0.0670679	STX1A|UNC13A	http://amigo.geneontology.org/amigo/term/GO:0016081
positive regulation of protein exit from endoplasmic reticulum	Gene Ontology	GO:0070863	2	11	0.0104472	0.0670679	SAR1B|SEC16B	http://amigo.geneontology.org/amigo/term/GO:0070863
negative regulation of receptor internalization	Gene Ontology	GO:0002091	2	11	0.0104472	0.0670679	WDR54|MTMR2	http://amigo.geneontology.org/amigo/term/GO:0002091
skin morphogenesis	Gene Ontology	GO:0043589	2	11	0.0104472	0.0670679	ITGA2|ITGB4	http://amigo.geneontology.org/amigo/term/GO:0043589
positive regulation of protein kinase A signaling	Gene Ontology	GO:0010739	2	11	0.0104472	0.0670679	SPATC1L|ADRB2	http://amigo.geneontology.org/amigo/term/GO:0010739
positive regulation of leukocyte migration	Gene Ontology	GO:0002687	2	11	0.0104472	0.0670679	ITGA2|TNFRSF18	http://amigo.geneontology.org/amigo/term/GO:0002687
negative regulation of telomerase activity	Gene Ontology	GO:0051974	2	11	0.0104472	0.0670679	SRC|SCG2	http://amigo.geneontology.org/amigo/term/GO:0051974
glucose binding	Gene Ontology	GO:0005536	2	11	0.0104472	0.0670679	G6PD|SLC2A3	http://amigo.geneontology.org/amigo/term/GO:0005536
membrane raft	Gene Ontology	GO:0045121	8	237	0.0104477	0.0670679	SRC|OLR1|CARD11|EGFR|SLC7A11|ADGRG1|LDHB|FURIN	http://amigo.geneontology.org/amigo/term/GO:0045121
negative regulation of protein catabolic process	Gene Ontology	GO:0042177	3	35	0.0108719	0.0689572	FLNA|EGFR|SERPINE2	http://amigo.geneontology.org/amigo/term/GO:0042177
chemokine-mediated signaling pathway	Gene Ontology	GO:0070098	4	67	0.0108973	0.0689572	GPR17|CCL18|GPR35|CCR6	http://amigo.geneontology.org/amigo/term/GO:0070098
cellular response to hydrogen peroxide	Gene Ontology	GO:0070301	4	67	0.0108973	0.0689572	SRC|SPHK1|MYB|PRKCD	http://amigo.geneontology.org/amigo/term/GO:0070301
cell chemotaxis	Gene Ontology	GO:0060326	4	67	0.0108973	0.0689572	HOXB9|PRKCD|CCR6|CXCR4	http://amigo.geneontology.org/amigo/term/GO:0060326
G protein-coupled receptor binding	Gene Ontology	GO:0001664	4	67	0.0108973	0.0689572	FLNA|HSPA1A|ITGB4|NPB	http://amigo.geneontology.org/amigo/term/GO:0001664
flagellated sperm motility	Gene Ontology	GO:0030317	4	67	0.0108973	0.0689572	LRRC6|TEKT2|CATSPER1|ADCY3	http://amigo.geneontology.org/amigo/term/GO:0030317
response to nutrient	Gene Ontology	GO:0007584	4	68	0.0114306	0.0720837	AACS|ASS1|UGT1A10|PKM	http://amigo.geneontology.org/amigo/term/GO:0007584
metalloendopeptidase activity	Gene Ontology	GO:0004222	5	106	0.011461	0.0720837	ADAMDEC1|ADAMTS18|MMP12|ADAMTS17|MMP9	http://amigo.geneontology.org/amigo/term/GO:0004222
cilium assembly	Gene Ontology	GO:0060271	7	194	0.0116625	0.0728327	FOXJ1|TEKT2|CEP126|DISC1|ARMC9|FLNA|DYNC2H1	http://amigo.geneontology.org/amigo/term/GO:0060271
acute-phase response	Gene Ontology	GO:0006953	3	36	0.0116739	0.0728327	ASS1|UGT1A10|MBL2	http://amigo.geneontology.org/amigo/term/GO:0006953
positive regulation of interleukin-12 production	Gene Ontology	GO:0032735	3	36	0.0116739	0.0728327	LTB|LGALS9|RIPK2	http://amigo.geneontology.org/amigo/term/GO:0032735
ciliary base	Gene Ontology	GO:0097546	3	36	0.0116739	0.0728327	DISC1|GLI1|CEP126	http://amigo.geneontology.org/amigo/term/GO:0097546
positive regulation of stem cell proliferation	Gene Ontology	GO:2000648	2	12	0.0120914	0.0743923	EPCAM|HMGA2	http://amigo.geneontology.org/amigo/term/GO:2000648
DNA-(apurinic or apyrimidinic site) endonuclease activity	Gene Ontology	GO:0003906	2	12	0.0120914	0.0743923	HMGA2|HMGA1	http://amigo.geneontology.org/amigo/term/GO:0003906
calcium channel inhibitor activity	Gene Ontology	GO:0019855	2	12	0.0120914	0.0743923	STX1A|TNNI3	http://amigo.geneontology.org/amigo/term/GO:0019855
negative regulation of peptidyl-tyrosine phosphorylation	Gene Ontology	GO:0050732	2	12	0.0120914	0.0743923	SEMA4D|PRKCD	http://amigo.geneontology.org/amigo/term/GO:0050732
transcytosis	Gene Ontology	GO:0045056	2	12	0.0120914	0.0743923	SRC|PTAFR	http://amigo.geneontology.org/amigo/term/GO:0045056
regulation of fibroblast migration	Gene Ontology	GO:0010762	2	12	0.0120914	0.0743923	PRR5L|RCC2	http://amigo.geneontology.org/amigo/term/GO:0010762
calcineurin-NFAT signaling cascade	Gene Ontology	GO:0033173	2	12	0.0120914	0.0743923	NFATC4|ADGRB2	http://amigo.geneontology.org/amigo/term/GO:0033173
lipid binding	Gene Ontology	GO:0008289	6	151	0.0124884	0.0756943	SPHK1|FCHSD1|FABP5|LPAR2|OSBPL3|OSBPL7	http://amigo.geneontology.org/amigo/term/GO:0008289
placenta development	Gene Ontology	GO:0001890	3	37	0.012509	0.0756943	GJB3|SOD1|PHLDA2	http://amigo.geneontology.org/amigo/term/GO:0001890
synaptic vesicle endocytosis	Gene Ontology	GO:0048488	3	37	0.012509	0.0756943	SYT8|STX1A|SNCG	http://amigo.geneontology.org/amigo/term/GO:0048488
ureteric bud development	Gene Ontology	GO:0001657	3	37	0.012509	0.0756943	BMP7|EPCAM|NPNT	http://amigo.geneontology.org/amigo/term/GO:0001657
positive regulation of smoothened signaling pathway	Gene Ontology	GO:0045880	3	37	0.012509	0.0756943	GLI1|DYNC2H1|ARMC9	http://amigo.geneontology.org/amigo/term/GO:0045880
positive regulation of protein binding	Gene Ontology	GO:0032092	4	70	0.0125467	0.0756943	LFNG|RIPK2|CTHRC1|SCG2	http://amigo.geneontology.org/amigo/term/GO:0032092
GABA-ergic synapse	Gene Ontology	GO:0098982	4	70	0.0125467	0.0756943	EFNA5|IGSF9B|SLITRK3|LRFN4	http://amigo.geneontology.org/amigo/term/GO:0098982
phospholipid binding	Gene Ontology	GO:0005543	5	109	0.0127508	0.07648	RASAL1|CACNA1I|PTAFR|PLA2G2D|UNC13A	http://amigo.geneontology.org/amigo/term/GO:0005543
nuclear matrix	Gene Ontology	GO:0016363	5	109	0.0127508	0.07648	MYB|SCG2|PRKCD|CFL1|VIM	http://amigo.geneontology.org/amigo/term/GO:0016363
presynapse	Gene Ontology	GO:0098793	5	109	0.0127508	0.07648	SPHK1|SLC1A7|MX2|SLC29A2|SLC2A1	http://amigo.geneontology.org/amigo/term/GO:0098793
cellular protein metabolic process	Gene Ontology	GO:0044267	7	198	0.0128828	0.0771232	VGF|VCAN|SCG2|ABCA3|LAMB1|TMEM132A|FURIN	http://amigo.geneontology.org/amigo/term/GO:0044267
negative regulation of DNA-binding transcription factor activity	Gene Ontology	GO:0043433	4	71	0.0131299	0.0784512	FLNA|SCG2|SFRP4|NR0B2	http://amigo.geneontology.org/amigo/term/GO:0043433
cellular response to estradiol stimulus	Gene Ontology	GO:0071392	3	38	0.0133775	0.0794719	ITGA2|EGFR|UGT1A10	http://amigo.geneontology.org/amigo/term/GO:0071392
frizzled binding	Gene Ontology	GO:0005109	3	38	0.0133775	0.0794719	WNT10B|CTHRC1|FZD7	http://amigo.geneontology.org/amigo/term/GO:0005109
muscle filament sliding	Gene Ontology	GO:0030049	3	38	0.0133775	0.0794719	TNNT1|TNNI3|VIM	http://amigo.geneontology.org/amigo/term/GO:0030049
regulation of mRNA stability	Gene Ontology	GO:0043488	5	111	0.0136631	0.079489	YWHAZ|PRKCD|HSPA1A|IGF2BP3|VIM	http://amigo.geneontology.org/amigo/term/GO:0043488
positive regulation of kinase activity	Gene Ontology	GO:0033674	4	72	0.0137301	0.079489	EPHB2|EGFR|INSR|MST1R	http://amigo.geneontology.org/amigo/term/GO:0033674
positive regulation of protein ubiquitination	Gene Ontology	GO:0031398	4	72	0.0137301	0.079489	INAVA|SPHK1|RIPK2|ADRB2	http://amigo.geneontology.org/amigo/term/GO:0031398
enzyme binding	Gene Ontology	GO:0019899	10	353	0.013789	0.079489	SRC|HSPA6|UGT1A10|PLAUR|MST1R|PRKCD|HMGA1|HSPA1A|EGFR|LGALS9	http://amigo.geneontology.org/amigo/term/GO:0019899
amino acid import across plasma membrane	Gene Ontology	GO:0089718	2	13	0.0138409	0.079489	SLC6A6|SLC7A1	http://amigo.geneontology.org/amigo/term/GO:0089718
actomyosin	Gene Ontology	GO:0042641	2	13	0.0138409	0.079489	STX1A|MYO18A	http://amigo.geneontology.org/amigo/term/GO:0042641
negative regulation of substrate adhesion-dependent cell spreading	Gene Ontology	GO:1900025	2	13	0.0138409	0.079489	EFNA5|RCC2	http://amigo.geneontology.org/amigo/term/GO:1900025
aldehyde dehydrogenase (NAD+) activity	Gene Ontology	GO:0004029	2	13	0.0138409	0.079489	ALDH1L1|ALDH7A1	http://amigo.geneontology.org/amigo/term/GO:0004029
BMP receptor binding	Gene Ontology	GO:0070700	2	13	0.0138409	0.079489	BMP7|SRC	http://amigo.geneontology.org/amigo/term/GO:0070700
heart contraction	Gene Ontology	GO:0060047	2	13	0.0138409	0.079489	TNNI3|SOD1	http://amigo.geneontology.org/amigo/term/GO:0060047
insulin-like growth factor I binding	Gene Ontology	GO:0031994	2	13	0.0138409	0.079489	INSR|ITGB4	http://amigo.geneontology.org/amigo/term/GO:0031994
low-density lipoprotein particle receptor activity	Gene Ontology	GO:0005041	2	13	0.0138409	0.079489	LRP8|OLR1	http://amigo.geneontology.org/amigo/term/GO:0005041
acetylcholine binding	Gene Ontology	GO:0042166	2	13	0.0138409	0.079489	CHRNA4|CHRNA7	http://amigo.geneontology.org/amigo/term/GO:0042166
negative regulation of protein import into nucleus	Gene Ontology	GO:0042308	2	13	0.0138409	0.079489	FERMT1|PKIA	http://amigo.geneontology.org/amigo/term/GO:0042308
activation of transmembrane receptor protein tyrosine kinase activity	Gene Ontology	GO:0007171	2	13	0.0138409	0.079489	EFNA5|ADRB2	http://amigo.geneontology.org/amigo/term/GO:0007171
dopaminergic synapse	Gene Ontology	GO:0098691	2	13	0.0138409	0.079489	CHRNA4|CHRNA5	http://amigo.geneontology.org/amigo/term/GO:0098691
positive regulation of cellular senescence	Gene Ontology	GO:2000774	2	13	0.0138409	0.079489	HMGA2|HMGA1	http://amigo.geneontology.org/amigo/term/GO:2000774
adherens junction	Gene Ontology	GO:0005912	6	155	0.0139911	0.0800557	CDH11|PDLIM4|TRIM29|EFNA5|SHROOM1|EFNB2	http://amigo.geneontology.org/amigo/term/GO:0005912
perikaryon	Gene Ontology	GO:0043204	6	155	0.0139911	0.0800557	SLC2A3|FCHSD1|ENO2|FLNA|KCNB1|ASS1	http://amigo.geneontology.org/amigo/term/GO:0043204
chondrocyte differentiation	Gene Ontology	GO:0002062	3	39	0.0142795	0.0809606	WNT10B|RUNX1|HMGA2	http://amigo.geneontology.org/amigo/term/GO:0002062
positive regulation of bone mineralization	Gene Ontology	GO:0030501	3	39	0.0142795	0.0809606	BMP7|WNT10B|ADRB2	http://amigo.geneontology.org/amigo/term/GO:0030501
presynaptic active zone	Gene Ontology	GO:0048786	3	39	0.0142795	0.0809606	PPFIA4|GAD1|UNC13A	http://amigo.geneontology.org/amigo/term/GO:0048786
cellular response to cadmium ion	Gene Ontology	GO:0071276	3	39	0.0142795	0.0809606	SOD1|EGFR|MMP9	http://amigo.geneontology.org/amigo/term/GO:0071276
positive regulation of translation	Gene Ontology	GO:0045727	4	73	0.0143475	0.0811979	ITGA2|PTAFR|CPEB3|VIM	http://amigo.geneontology.org/amigo/term/GO:0045727
regulation of ion transmembrane transport	Gene Ontology	GO:0034765	5	113	0.0146183	0.0825802	KCNB1|CLIC1|CLIC3|KCNF1|CATSPER1	http://amigo.geneontology.org/amigo/term/GO:0034765
apical part of cell	Gene Ontology	GO:0045177	4	74	0.0149822	0.0843289	USH1C|DYNC2H1|SLC7A11|ITPR3	http://amigo.geneontology.org/amigo/term/GO:0045177
defense response	Gene Ontology	GO:0006952	4	74	0.0149822	0.0843289	MX2|CD83|KCNN4|MST1R	http://amigo.geneontology.org/amigo/term/GO:0006952
microtubule	Gene Ontology	GO:0005874	9	305	0.01503	0.0844454	RCC2|DISC1|RASSF1|TEKT2|TUBB3|NAV1|TUBA1C|SHROOM1|DYNC2H1	http://amigo.geneontology.org/amigo/term/GO:0005874
secretory granule lumen	Gene Ontology	GO:0034774	5	114	0.0151123	0.0845684	AMPD3|IMPDH1|S100P|HSPA6|PKM	http://amigo.geneontology.org/amigo/term/GO:0034774
positive regulation of interleukin-10 production	Gene Ontology	GO:0032733	3	40	0.0152152	0.0845684	INAVA|LGALS9|CD83	http://amigo.geneontology.org/amigo/term/GO:0032733
embryo implantation	Gene Ontology	GO:0007566	3	40	0.0152152	0.0845684	SOD1|SLC7A11|MMP9	http://amigo.geneontology.org/amigo/term/GO:0007566
ovarian follicle development	Gene Ontology	GO:0001541	3	40	0.0152152	0.0845684	VGF|LFNG|SOD1	http://amigo.geneontology.org/amigo/term/GO:0001541
centrosome cycle	Gene Ontology	GO:0007098	3	40	0.0152152	0.0845684	CHD3|ARL2|FES	http://amigo.geneontology.org/amigo/term/GO:0007098
calcium ion transport	Gene Ontology	GO:0006816	4	75	0.0156343	0.0852395	CHRNA4|KCNN4|CDH23|CATSPER1	http://amigo.geneontology.org/amigo/term/GO:0006816
respiratory system process	Gene Ontology	GO:0003016	2	14	0.0156926	0.0852395	YWHAZ|JAG2	http://amigo.geneontology.org/amigo/term/GO:0003016
sterol transporter activity	Gene Ontology	GO:0015248	2	14	0.0156926	0.0852395	OSBPL3|OSBPL7	http://amigo.geneontology.org/amigo/term/GO:0015248
response to growth hormone	Gene Ontology	GO:0060416	2	14	0.0156926	0.0852395	ASS1|TRIM16	http://amigo.geneontology.org/amigo/term/GO:0060416
detection of mechanical stimulus involved in sensory perception of pain	Gene Ontology	GO:0050966	2	14	0.0156926	0.0852395	ITGA2|CXCR4	http://amigo.geneontology.org/amigo/term/GO:0050966
inhibitory synapse	Gene Ontology	GO:0060077	2	14	0.0156926	0.0852395	IGSF9B|GAD1	http://amigo.geneontology.org/amigo/term/GO:0060077
maintenance of protein location in nucleus	Gene Ontology	GO:0051457	2	14	0.0156926	0.0852395	CHCHD10|ARL2	http://amigo.geneontology.org/amigo/term/GO:0051457
negative regulation of cytokine production	Gene Ontology	GO:0001818	2	14	0.0156926	0.0852395	GPNMB|SLC11A1	http://amigo.geneontology.org/amigo/term/GO:0001818
cellular response to nutrient levels	Gene Ontology	GO:0031669	2	14	0.0156926	0.0852395	UTS2|KCNB1	http://amigo.geneontology.org/amigo/term/GO:0031669
response to amyloid-beta	Gene Ontology	GO:1904645	2	14	0.0156926	0.0852395	MMP12|MMP9	http://amigo.geneontology.org/amigo/term/GO:1904645
digestive tract morphogenesis	Gene Ontology	GO:0048546	2	14	0.0156926	0.0852395	GLI1|EGFR	http://amigo.geneontology.org/amigo/term/GO:0048546
exploration behavior	Gene Ontology	GO:0035640	2	14	0.0156926	0.0852395	CHRNA4|ITGA3	http://amigo.geneontology.org/amigo/term/GO:0035640
cargo receptor activity	Gene Ontology	GO:0038024	2	14	0.0156926	0.0852395	INSR|LRP8	http://amigo.geneontology.org/amigo/term/GO:0038024
photoreceptor cell maintenance	Gene Ontology	GO:0045494	3	41	0.0161848	0.0870002	USH1C|CDH23|SLC2A1	http://amigo.geneontology.org/amigo/term/GO:0045494
cytokine binding	Gene Ontology	GO:0019955	3	41	0.0161848	0.0870002	NELL2|TNFRSF11A|IL2RG	http://amigo.geneontology.org/amigo/term/GO:0019955
negative regulation of T cell proliferation	Gene Ontology	GO:0042130	3	41	0.0161848	0.0870002	FOXJ1|GPNMB|PLA2G2D	http://amigo.geneontology.org/amigo/term/GO:0042130
mitotic spindle assembly	Gene Ontology	GO:0090307	3	41	0.0161848	0.0870002	FLNA|MYBL2|MISP	http://amigo.geneontology.org/amigo/term/GO:0090307
potassium channel regulator activity	Gene Ontology	GO:0015459	3	41	0.0161848	0.0870002	LRRC26|ADRB2|FLNA	http://amigo.geneontology.org/amigo/term/GO:0015459
neuromuscular junction	Gene Ontology	GO:0031594	4	76	0.016304	0.0874894	FCHSD1|SYNGR3|SERPINE2|UNC13A	http://amigo.geneontology.org/amigo/term/GO:0031594
protein localization	Gene Ontology	GO:0008104	4	77	0.0169914	0.0907082	NRCAM|DUOXA1|NBEAL2|SLC9A2	http://amigo.geneontology.org/amigo/term/GO:0008104
branching involved in ureteric bud morphogenesis	Gene Ontology	GO:0001658	3	42	0.0171883	0.0909777	NPNT|MYC|HOXA11	http://amigo.geneontology.org/amigo/term/GO:0001658
collagen catabolic process	Gene Ontology	GO:0030574	3	42	0.0171883	0.0909777	FURIN|MMP12|MMP9	http://amigo.geneontology.org/amigo/term/GO:0030574
animal organ regeneration	Gene Ontology	GO:0031100	3	42	0.0171883	0.0909777	NR0B2|UGT1A10|PKM	http://amigo.geneontology.org/amigo/term/GO:0031100
amino acid transmembrane transporter activity	Gene Ontology	GO:0015171	3	42	0.0171883	0.0909777	SLC1A5|SLC6A6|SLC7A1	http://amigo.geneontology.org/amigo/term/GO:0015171
protein homotrimerization	Gene Ontology	GO:0070207	2	15	0.017644	0.0918257	SLC1A5|ALOX5AP	http://amigo.geneontology.org/amigo/term/GO:0070207
regulation of regulatory T cell differentiation	Gene Ontology	GO:0045589	2	15	0.017644	0.0918257	RUNX1|TNFRSF18	http://amigo.geneontology.org/amigo/term/GO:0045589
glucose transmembrane transporter activity	Gene Ontology	GO:0005355	2	15	0.017644	0.0918257	SLC2A3|SLC2A1	http://amigo.geneontology.org/amigo/term/GO:0005355
positive regulation of T cell receptor signaling pathway	Gene Ontology	GO:0050862	2	15	0.017644	0.0918257	CARD11|KCNN4	http://amigo.geneontology.org/amigo/term/GO:0050862
vacuole	Gene Ontology	GO:0005773	2	15	0.017644	0.0918257	GLB1L2|MST1R	http://amigo.geneontology.org/amigo/term/GO:0005773
positive regulation of neuron migration	Gene Ontology	GO:2001224	2	15	0.017644	0.0918257	SEMA3A|FLNA	http://amigo.geneontology.org/amigo/term/GO:2001224
positive regulation of DNA biosynthetic process	Gene Ontology	GO:2000573	2	15	0.017644	0.0918257	SRC|MYC	http://amigo.geneontology.org/amigo/term/GO:2000573
positive regulation of dendrite development	Gene Ontology	GO:1900006	2	15	0.017644	0.0918257	BMP7|LRP8	http://amigo.geneontology.org/amigo/term/GO:1900006
nerve development	Gene Ontology	GO:0021675	2	15	0.017644	0.0918257	SEMA3A|NELL2	http://amigo.geneontology.org/amigo/term/GO:0021675
dense core granule	Gene Ontology	GO:0031045	2	15	0.017644	0.0918257	SYT8|SOD1	http://amigo.geneontology.org/amigo/term/GO:0031045
mitochondrial intermembrane space	Gene Ontology	GO:0005758	4	78	0.0176966	0.0919456	CHCHD10|PRELID3A|ARL2|SOD1	http://amigo.geneontology.org/amigo/term/GO:0005758
nucleolus	Gene Ontology	GO:0005730	18	839	0.017959	0.0929975	DOC2A|RCC2|CA9|ITGB4|MXI1|ITPR3|ARL2|GJB4|ZNF554|SLC29A2|CHD3|PNMA1|FLNA|IGF2BP3|SAPCD2|GPRC5A|MYC|ARL4A	http://amigo.geneontology.org/amigo/term/GO:0005730
transcription regulatory region sequence-specific DNA binding	Gene Ontology	GO:0000976	8	263	0.0181365	0.0937541	ARNTL|FOXJ1|RUNX1|HMGA2|SCG2|CREB3L3|CREB3L1|GLI1	http://amigo.geneontology.org/amigo/term/GO:0000976
regulation of RNA splicing	Gene Ontology	GO:0043484	3	43	0.0182258	0.0937541	PRDX6|ESRP1|RBM38	http://amigo.geneontology.org/amigo/term/GO:0043484
epithelial to mesenchymal transition	Gene Ontology	GO:0001837	3	43	0.0182258	0.0937541	BMP7|S100A4|HMGA2	http://amigo.geneontology.org/amigo/term/GO:0001837
substantia nigra development	Gene Ontology	GO:0021762	3	43	0.0182258	0.0937541	SYNGR3|G6PD|MBL2	http://amigo.geneontology.org/amigo/term/GO:0021762
magnesium ion binding	Gene Ontology	GO:0000287	7	214	0.0186887	0.0958183	SPHK1|MTHFD2|PRTFDC1|S100P|TESC|ENO2|PKM	http://amigo.geneontology.org/amigo/term/GO:0000287
amyloid-beta binding	Gene Ontology	GO:0001540	4	80	0.0191612	0.0980788	EPHB2|INSR|ADRB2|ITGA2	http://amigo.geneontology.org/amigo/term/GO:0001540
CARD domain binding	Gene Ontology	GO:0050700	2	16	0.0196924	0.0991643	CARD11|RIPK2	http://amigo.geneontology.org/amigo/term/GO:0050700
tropomyosin binding	Gene Ontology	GO:0005523	2	16	0.0196924	0.0991643	TNNT1|S100A6	http://amigo.geneontology.org/amigo/term/GO:0005523
positive regulation of calcium ion-dependent exocytosis	Gene Ontology	GO:0045956	2	16	0.0196924	0.0991643	STX1A|KCNB1	http://amigo.geneontology.org/amigo/term/GO:0045956
1-acylglycerol-3-phosphate O-acyltransferase activity	Gene Ontology	GO:0003841	2	16	0.0196924	0.0991643	LPCAT4|LPCAT1	http://amigo.geneontology.org/amigo/term/GO:0003841
sterol binding	Gene Ontology	GO:0032934	2	16	0.0196924	0.0991643	OSBPL3|OSBPL7	http://amigo.geneontology.org/amigo/term/GO:0032934
positive regulation of heterotypic cell-cell adhesion	Gene Ontology	GO:0034116	2	16	0.0196924	0.0991643	BMP7|CEACAM6	http://amigo.geneontology.org/amigo/term/GO:0034116
regulation of protein catabolic process	Gene Ontology	GO:0042176	2	16	0.0196924	0.0991643	ARNTL|FURIN	http://amigo.geneontology.org/amigo/term/GO:0042176
acetylcholine-gated cation-selective channel activity	Gene Ontology	GO:0022848	2	16	0.0196924	0.0991643	CHRNA4|CHRNA5	http://amigo.geneontology.org/amigo/term/GO:0022848
chemokine receptor activity	Gene Ontology	GO:0004950	2	16	0.0196924	0.0991643	GPR17|CCR6	http://amigo.geneontology.org/amigo/term/GO:0004950
GTPase activity	Gene Ontology	GO:0003924	9	320	0.0196924	0.0991643	RAB7B|RAB6D|ARL2|MX2|TUBB3|RHOV|TUBA1C|SAR1B|ARL4C	http://amigo.geneontology.org/amigo/term/GO:0003924
cellular response to calcium ion	Gene Ontology	GO:0071277	4	81	0.0199207	0.100152	SYT8|RASAL1|ALOX5AP|CPNE7	http://amigo.geneontology.org/amigo/term/GO:0071277
DNA-binding transcription factor activity	Gene Ontology	GO:0003700	14	607	0.0203686	0.10159	NFIC|FOXJ1|HOXB9|NFATC4|MECOM|ZNF93|EVX1|HOXB7|ZNF554|HOXA3|FOSL2|MYC|NFIX|XBP1	http://amigo.geneontology.org/amigo/term/GO:0003700
ATPase-coupled transmembrane transporter activity	Gene Ontology	GO:0042626	3	45	0.0204031	0.10159	ABCA12|ABCA3|ABCB9	http://amigo.geneontology.org/amigo/term/GO:0042626
bone mineralization	Gene Ontology	GO:0030282	3	45	0.0204031	0.10159	COMP|GPNMB|PTHLH	http://amigo.geneontology.org/amigo/term/GO:0030282
response to organic cyclic compound	Gene Ontology	GO:0014070	3	45	0.0204031	0.10159	CD83|G6PD|SLC7A11	http://amigo.geneontology.org/amigo/term/GO:0014070
long-term synaptic potentiation	Gene Ontology	GO:0060291	3	45	0.0204031	0.10159	ITPR3|NFATC4|SERPINE2	http://amigo.geneontology.org/amigo/term/GO:0060291
cellular_component	Gene Ontology	GO:0005575	11	433	0.0205236	0.102027	PCNX2|KRBA1|SLC35F2|SPATC1L|LTB|TMEM205|TTC39A|NXPH4|ZNF107|LHFPL2|TMEM51	http://amigo.geneontology.org/amigo/term/GO:0005575
neurotransmitter receptor activity	Gene Ontology	GO:0030594	4	82	0.0206986	0.102732	CHRNA4|CHRNA5|CHRNA7|GABRP	http://amigo.geneontology.org/amigo/term/GO:0030594
endomembrane system	Gene Ontology	GO:0012505	5	125	0.0212951	0.104532	RAB6D|STX1A|RNF145|BIK|SLC2A12	http://amigo.geneontology.org/amigo/term/GO:0012505
lung development	Gene Ontology	GO:0030324	4	83	0.0214949	0.104532	YWHAZ|ITGA3|EGFR|GLI1	http://amigo.geneontology.org/amigo/term/GO:0030324
forebrain development	Gene Ontology	GO:0030900	3	46	0.021543	0.104532	DCLK1|DYNC2H1|SRC	http://amigo.geneontology.org/amigo/term/GO:0030900
non-motile cilium assembly	Gene Ontology	GO:1905515	3	46	0.021543	0.104532	DISC1|DYNC2H1|CEP126	http://amigo.geneontology.org/amigo/term/GO:1905515
ciliary tip	Gene Ontology	GO:0097542	3	46	0.021543	0.104532	GLI1|DYNC2H1|ARMC9	http://amigo.geneontology.org/amigo/term/GO:0097542
dendritic cell chemotaxis	Gene Ontology	GO:0002407	2	17	0.021835	0.104532	CCR6|CXCR4	http://amigo.geneontology.org/amigo/term/GO:0002407
perinuclear endoplasmic reticulum	Gene Ontology	GO:0097038	2	17	0.021835	0.104532	OSBPL3|OSBPL7	http://amigo.geneontology.org/amigo/term/GO:0097038
negative regulation of myotube differentiation	Gene Ontology	GO:0010832	2	17	0.021835	0.104532	CEACAM5|XBP1	http://amigo.geneontology.org/amigo/term/GO:0010832
apical dendrite	Gene Ontology	GO:0097440	2	17	0.021835	0.104532	FLNA|CPEB3	http://amigo.geneontology.org/amigo/term/GO:0097440
postsynaptic density, intracellular component	Gene Ontology	GO:0099092	2	17	0.021835	0.104532	DLG3|PRR7	http://amigo.geneontology.org/amigo/term/GO:0099092
negative regulation of protein localization to nucleus	Gene Ontology	GO:1900181	2	17	0.021835	0.104532	DCLK1|TRIM29	http://amigo.geneontology.org/amigo/term/GO:1900181
stabilization of membrane potential	Gene Ontology	GO:0030322	2	17	0.021835	0.104532	CHCHD10|KCNN4	http://amigo.geneontology.org/amigo/term/GO:0030322
negative regulation of cell-substrate adhesion	Gene Ontology	GO:0010812	2	17	0.021835	0.104532	SCG2|FZD7	http://amigo.geneontology.org/amigo/term/GO:0010812
chondrocyte development	Gene Ontology	GO:0002063	2	17	0.021835	0.104532	COMP|COL11A1	http://amigo.geneontology.org/amigo/term/GO:0002063
lymph node development	Gene Ontology	GO:0048535	2	17	0.021835	0.104532	LTB|TNFRSF11A	http://amigo.geneontology.org/amigo/term/GO:0048535
positive regulation of keratinocyte differentiation	Gene Ontology	GO:0045618	2	17	0.021835	0.104532	OVOL2|TRIM16	http://amigo.geneontology.org/amigo/term/GO:0045618
acrosome reaction	Gene Ontology	GO:0007340	2	17	0.021835	0.104532	SYT8|ADCY3	http://amigo.geneontology.org/amigo/term/GO:0007340
axon initial segment	Gene Ontology	GO:0043194	2	17	0.021835	0.104532	NRCAM|NAV1	http://amigo.geneontology.org/amigo/term/GO:0043194
regulation of calcium ion-dependent exocytosis	Gene Ontology	GO:0017158	2	17	0.021835	0.104532	DOC2A|SYT8	http://amigo.geneontology.org/amigo/term/GO:0017158
long-chain fatty acid transporter activity	Gene Ontology	GO:0005324	2	17	0.021835	0.104532	FABP5|SLC2A1	http://amigo.geneontology.org/amigo/term/GO:0005324
cell leading edge	Gene Ontology	GO:0031252	3	47	0.0227171	0.108421	CXCR4|ITGB4|VIM	http://amigo.geneontology.org/amigo/term/GO:0031252
trans-Golgi network	Gene Ontology	GO:0005802	6	174	0.0228636	0.108953	RAB7B|CNST|MYO18A|FUT4|CXCR4|FURIN	http://amigo.geneontology.org/amigo/term/GO:0005802
innate immune response	Gene Ontology	GO:0045087	13	558	0.0231496	0.110147	INAVA|SRC|TRIM29|STYK1|ZNF683|NLRP2|MST1R|RIPK2|TRIM59|FES|MBL2|ELF4|CD300LB	http://amigo.geneontology.org/amigo/term/GO:0045087
phosphatidic acid biosynthetic process	Gene Ontology	GO:0006654	3	48	0.0239254	0.112288	LPCAT4|PLA2G2D|LPCAT1	http://amigo.geneontology.org/amigo/term/GO:0006654
adult locomotory behavior	Gene Ontology	GO:0008344	3	48	0.0239254	0.112288	SNCG|HOXB8|PREX2	http://amigo.geneontology.org/amigo/term/GO:0008344
positive regulation of cell adhesion	Gene Ontology	GO:0045785	3	48	0.0239254	0.112288	ITGA2|TNFRSF18|ADGRG1	http://amigo.geneontology.org/amigo/term/GO:0045785
positive regulation of phosphatidylinositol 3-kinase signaling	Gene Ontology	GO:0014068	4	86	0.0239951	0.112288	SRC|INSR|SEMA4D|PRR5L	http://amigo.geneontology.org/amigo/term/GO:0014068
phosphatidylinositol acyl-chain remodeling	Gene Ontology	GO:0036149	2	18	0.0240694	0.112288	PLA2G2D|PLBD1	http://amigo.geneontology.org/amigo/term/GO:0036149
iron ion transport	Gene Ontology	GO:0006826	2	18	0.0240694	0.112288	HEPH|SLC11A1	http://amigo.geneontology.org/amigo/term/GO:0006826
retinoid X receptor binding	Gene Ontology	GO:0046965	2	18	0.0240694	0.112288	NR0B2|HMGA1	http://amigo.geneontology.org/amigo/term/GO:0046965
negative regulation of focal adhesion assembly	Gene Ontology	GO:0051895	2	18	0.0240694	0.112288	SRC|RCC2	http://amigo.geneontology.org/amigo/term/GO:0051895
action potential	Gene Ontology	GO:0001508	2	18	0.0240694	0.112288	CHRNA4|KCNB1	http://amigo.geneontology.org/amigo/term/GO:0001508
cadherin binding involved in cell-cell adhesion	Gene Ontology	GO:0098641	2	18	0.0240694	0.112288	EPCAM|TRIM29	http://amigo.geneontology.org/amigo/term/GO:0098641
myeloid cell differentiation	Gene Ontology	GO:0030099	2	18	0.0240694	0.112288	ZBTB16|HOXB7	http://amigo.geneontology.org/amigo/term/GO:0030099
negative regulation of myeloid cell differentiation	Gene Ontology	GO:0045638	2	18	0.0240694	0.112288	HOXB8|ZBTB16	http://amigo.geneontology.org/amigo/term/GO:0045638
SMAD binding	Gene Ontology	GO:0046332	3	49	0.0251679	0.116537	FLNA|CREB3L1|HMGA2	http://amigo.geneontology.org/amigo/term/GO:0046332
cholesterol binding	Gene Ontology	GO:0015485	3	49	0.0251679	0.116537	GRAMD1B|OSBPL7|OSBPL3	http://amigo.geneontology.org/amigo/term/GO:0015485
intermediate filament cytoskeleton	Gene Ontology	GO:0045111	3	49	0.0251679	0.116537	DISC1|EVPL|VIM	http://amigo.geneontology.org/amigo/term/GO:0045111
phosphatase binding	Gene Ontology	GO:0019902	3	49	0.0251679	0.116537	PPP1R36|CNST|DLG3	http://amigo.geneontology.org/amigo/term/GO:0019902
regulation of cell adhesion	Gene Ontology	GO:0030155	3	49	0.0251679	0.116537	JAG2|FES|CXCR4	http://amigo.geneontology.org/amigo/term/GO:0030155
positive regulation of angiogenesis	Gene Ontology	GO:0045766	5	131	0.0252723	0.116673	ITGAX|SPHK1|RUNX1|HMGA2|XBP1	http://amigo.geneontology.org/amigo/term/GO:0045766
ATPase activity	Gene Ontology	GO:0016887	7	229	0.0256056	0.118036	ABCA12|HSPA6|CHD3|MYO18A|HSPA1A|ABCA3|ABCB9	http://amigo.geneontology.org/amigo/term/GO:0016887
ATPase binding	Gene Ontology	GO:0051117	4	88	0.0257557	0.11805	SLC26A9|EGFR|ATP1B3|SRC	http://amigo.geneontology.org/amigo/term/GO:0051117
regulation of transcription by RNA polymerase II	Gene Ontology	GO:0006357	16	751	0.0260939	0.11805	EPOP|MYC|MYEF2|HR|SPDEF|EGFR|SCG2|HOXA11|HOXC6|RUNX1|PTAFR|CHD3|FOSL2|PBX4|MYBL2|ELF4	http://amigo.geneontology.org/amigo/term/GO:0006357
positive regulation of smooth muscle cell migration	Gene Ontology	GO:0014911	2	19	0.0263931	0.11805	SRC|ITGA2	http://amigo.geneontology.org/amigo/term/GO:0014911
transition metal ion binding	Gene Ontology	GO:0046914	2	19	0.0263931	0.11805	S100A4|S100P	http://amigo.geneontology.org/amigo/term/GO:0046914
core promoter sequence-specific DNA binding	Gene Ontology	GO:0001046	2	19	0.0263931	0.11805	MYC|MMP12	http://amigo.geneontology.org/amigo/term/GO:0001046
positive regulation of bone resorption	Gene Ontology	GO:0045780	2	19	0.0263931	0.11805	EGFR|TNFRSF11A	http://amigo.geneontology.org/amigo/term/GO:0045780
folic acid metabolic process	Gene Ontology	GO:0046655	2	19	0.0263931	0.11805	ALDH1L1|MTHFD2	http://amigo.geneontology.org/amigo/term/GO:0046655
osteoblast development	Gene Ontology	GO:0002076	2	19	0.0263931	0.11805	SCG2|PTHLH	http://amigo.geneontology.org/amigo/term/GO:0002076
gap junction channel activity	Gene Ontology	GO:0005243	2	19	0.0263931	0.11805	GJB3|GJB4	http://amigo.geneontology.org/amigo/term/GO:0005243
TOR signaling	Gene Ontology	GO:0031929	2	19	0.0263931	0.11805	DISC1|EIF4EBP2	http://amigo.geneontology.org/amigo/term/GO:0031929
connexin complex	Gene Ontology	GO:0005922	2	19	0.0263931	0.11805	GJB3|GJB4	http://amigo.geneontology.org/amigo/term/GO:0005922
positive regulation of chondrocyte differentiation	Gene Ontology	GO:0032332	2	19	0.0263931	0.11805	ZBTB16|HOXA11	http://amigo.geneontology.org/amigo/term/GO:0032332
innervation	Gene Ontology	GO:0060384	2	19	0.0263931	0.11805	SERPINE2|UNC13A	http://amigo.geneontology.org/amigo/term/GO:0060384
outer dynein arm assembly	Gene Ontology	GO:0036158	2	19	0.0263931	0.11805	LRRC6|DNAAF4	http://amigo.geneontology.org/amigo/term/GO:0036158
ventricular system development	Gene Ontology	GO:0021591	2	19	0.0263931	0.11805	AK8|SLC7A11	http://amigo.geneontology.org/amigo/term/GO:0021591
vesicle transport along actin filament	Gene Ontology	GO:0030050	2	19	0.0263931	0.11805	MYO1A|MYO7B	http://amigo.geneontology.org/amigo/term/GO:0030050
positive regulation of tumor necrosis factor production	Gene Ontology	GO:0032760	3	50	0.0264445	0.11805	NFATC4|RIPK2|PTAFR	http://amigo.geneontology.org/amigo/term/GO:0032760
negative regulation of phosphatase activity	Gene Ontology	GO:0010923	3	50	0.0264445	0.11805	PPP1R36|CNST|DLG3	http://amigo.geneontology.org/amigo/term/GO:0010923
regulation of synaptic plasticity	Gene Ontology	GO:0048167	3	50	0.0264445	0.11805	VGF|CPEB3|EIF4EBP2	http://amigo.geneontology.org/amigo/term/GO:0048167
positive regulation of protein serine/threonine kinase activity	Gene Ontology	GO:0071902	3	50	0.0264445	0.11805	SRC|ADRB2|HMGA2	http://amigo.geneontology.org/amigo/term/GO:0071902
neuron development	Gene Ontology	GO:0048666	3	50	0.0264445	0.11805	PBX4|MTMR2|XBP1	http://amigo.geneontology.org/amigo/term/GO:0048666
epidermal growth factor receptor signaling pathway	Gene Ontology	GO:0007173	3	50	0.0264445	0.11805	FAM83B|EGFR|SRC	http://amigo.geneontology.org/amigo/term/GO:0007173
brain development	Gene Ontology	GO:0007420	7	231	0.0266439	0.118495	B3GNT5|SPHK1|FOXJ1|SCG2|ADGRG1|CXCR4|PBX4	http://amigo.geneontology.org/amigo/term/GO:0007420
membrane organization	Gene Ontology	GO:0061024	5	133	0.0266967	0.118495	YWHAZ|SAR1B|EGFR|ADRB2|MBL2	http://amigo.geneontology.org/amigo/term/GO:0061024
mitotic cell cycle	Gene Ontology	GO:0000278	5	134	0.0274277	0.121566	TUBA1C|MYB|MYBL2|TUBB3|SCG2	http://amigo.geneontology.org/amigo/term/GO:0000278
azurophil granule lumen	Gene Ontology	GO:0035578	4	90	0.0275919	0.121946	PRDX6|FABP5|PRKCD|IMPDH1	http://amigo.geneontology.org/amigo/term/GO:0035578
cell periphery	Gene Ontology	GO:0071944	3	51	0.0277551	0.122319	FUT4|ITGA3|MBL2	http://amigo.geneontology.org/amigo/term/GO:0071944
synapse organization	Gene Ontology	GO:0050808	3	51	0.0277551	0.122319	SNCG|PPFIA4|SEMA3E	http://amigo.geneontology.org/amigo/term/GO:0050808
dephosphorylation	Gene Ontology	GO:0016311	4	91	0.0285386	0.125164	DUSP4|PFKFB3|NT5DC2|PFKFB4	http://amigo.geneontology.org/amigo/term/GO:0016311
mannose binding	Gene Ontology	GO:0005537	2	20	0.0288035	0.125164	SLC7A11|MBL2	http://amigo.geneontology.org/amigo/term/GO:0005537
protein refolding	Gene Ontology	GO:0042026	2	20	0.0288035	0.125164	HSPA1A|HSPA6	http://amigo.geneontology.org/amigo/term/GO:0042026
glutathione peroxidase activity	Gene Ontology	GO:0004602	2	20	0.0288035	0.125164	PRDX6|ALOX5AP	http://amigo.geneontology.org/amigo/term/GO:0004602
positive regulation of cell motility	Gene Ontology	GO:2000147	2	20	0.0288035	0.125164	EPCAM|SPOCK2	http://amigo.geneontology.org/amigo/term/GO:2000147
estrogen metabolic process	Gene Ontology	GO:0008210	2	20	0.0288035	0.125164	SULT1A1|UGT1A10	http://amigo.geneontology.org/amigo/term/GO:0008210
signal transduction involved in regulation of gene expression	Gene Ontology	GO:0023019	2	20	0.0288035	0.125164	MSX1|EPCAM	http://amigo.geneontology.org/amigo/term/GO:0023019
positive regulation of blood vessel diameter	Gene Ontology	GO:0097755	2	20	0.0288035	0.125164	EGFR|PTAFR	http://amigo.geneontology.org/amigo/term/GO:0097755
regulated exocytosis	Gene Ontology	GO:0045055	2	20	0.0288035	0.125164	SYNGR3|ABCA12	http://amigo.geneontology.org/amigo/term/GO:0045055
positive regulation of Notch signaling pathway	Gene Ontology	GO:0045747	3	52	0.0290998	0.126275	JAG2|SRC|LFNG	http://amigo.geneontology.org/amigo/term/GO:0045747
response to lipopolysaccharide	Gene Ontology	GO:0032496	5	137	0.0296965	0.128685	LGALS9|SLC11A1|TNFRSF11A|UGT1A10|S100A14	http://amigo.geneontology.org/amigo/term/GO:0032496
response to unfolded protein	Gene Ontology	GO:0006986	3	53	0.0304784	0.131205	COMP|HSPA1A|HSPA6	http://amigo.geneontology.org/amigo/term/GO:0006986
regulation of cardiac conduction	Gene Ontology	GO:1903779	3	53	0.0304784	0.131205	ITPR3|ATP1B3|FXYD3	http://amigo.geneontology.org/amigo/term/GO:1903779
T cell costimulation	Gene Ontology	GO:0031295	3	53	0.0304784	0.131205	EFNB2|SRC|CARD11	http://amigo.geneontology.org/amigo/term/GO:0031295
cellular response to cAMP	Gene Ontology	GO:0071320	3	53	0.0304784	0.131205	ASS1|WNT10B|PTAFR	http://amigo.geneontology.org/amigo/term/GO:0071320
neuron differentiation	Gene Ontology	GO:0030182	5	139	0.0312729	0.133576	WNT10B|RUNX1|TUBB3|MYEF2|FZD7	http://amigo.geneontology.org/amigo/term/GO:0030182
C-C chemokine receptor activity	Gene Ontology	GO:0016493	2	21	0.0312982	0.133576	CCR6|CXCR4	http://amigo.geneontology.org/amigo/term/GO:0016493
Rac guanyl-nucleotide exchange factor activity	Gene Ontology	GO:0030676	2	21	0.0312982	0.133576	EPS8L3|PREX2	http://amigo.geneontology.org/amigo/term/GO:0030676
regulation of postsynapse organization	Gene Ontology	GO:0099175	2	21	0.0312982	0.133576	NRCAM|NELL2	http://amigo.geneontology.org/amigo/term/GO:0099175
non-canonical Wnt signaling pathway	Gene Ontology	GO:0035567	2	21	0.0312982	0.133576	SFRP4|FZD7	http://amigo.geneontology.org/amigo/term/GO:0035567
phosphatidylserine acyl-chain remodeling	Gene Ontology	GO:0036150	2	21	0.0312982	0.133576	LPCAT4|PLA2G2D	http://amigo.geneontology.org/amigo/term/GO:0036150
cytoskeleton	Gene Ontology	GO:0005856	10	406	0.0315295	0.134011	PDLIM4|RIN1|SLC7A11|VIM|LRRC26|RIPK2|STK39|TMSB10|USH1C|FERMT1	http://amigo.geneontology.org/amigo/term/GO:0005856
protein kinase C binding	Gene Ontology	GO:0005080	3	54	0.0318909	0.134993	SRC|NELL2|UGT1A10	http://amigo.geneontology.org/amigo/term/GO:0005080
symporter activity	Gene Ontology	GO:0015293	3	54	0.0318909	0.134993	SLC1A5|SLC16A3|SLC1A7	http://amigo.geneontology.org/amigo/term/GO:0015293
pyridoxal phosphate binding	Gene Ontology	GO:0030170	3	54	0.0318909	0.134993	CTH|GAD1|ACCS	http://amigo.geneontology.org/amigo/term/GO:0030170
growth cone	Gene Ontology	GO:0030426	5	140	0.0320804	0.135426	ORAI2|FLNA|DLG3|TUBB3|ADGRL1	http://amigo.geneontology.org/amigo/term/GO:0030426
lipid metabolic process	Gene Ontology	GO:0006629	5	140	0.0320804	0.135426	FABP5|WNT10B|G6PD|CPNE7|LRP8	http://amigo.geneontology.org/amigo/term/GO:0006629
endoplasmic reticulum lumen	Gene Ontology	GO:0005788	8	296	0.0328636	0.138356	COL11A1|PLAUR|VGF|VCAN|SCG2|SELENOM|LAMB1|TMEM132A	http://amigo.geneontology.org/amigo/term/GO:0005788
extracellular vesicle	Gene Ontology	GO:1903561	3	55	0.033337	0.139218	LFNG|SERPINE2|PKM	http://amigo.geneontology.org/amigo/term/GO:1903561
tertiary granule lumen	Gene Ontology	GO:1904724	3	55	0.033337	0.139218	CHIT1|QPCT|MMP9	http://amigo.geneontology.org/amigo/term/GO:1904724
protein secretion	Gene Ontology	GO:0009306	3	55	0.033337	0.139218	COMP|SCG2|SNCG	http://amigo.geneontology.org/amigo/term/GO:0009306
positive regulation of protein localization to plasma membrane	Gene Ontology	GO:1903078	3	55	0.033337	0.139218	EPHB2|ITGA3|EGFR	http://amigo.geneontology.org/amigo/term/GO:1903078
cell-cell adhesion	Gene Ontology	GO:0098609	5	142	0.0337341	0.139773	NRCAM|SRC|DLG3|EGFR|TRIM29	http://amigo.geneontology.org/amigo/term/GO:0098609
small GTPase binding	Gene Ontology	GO:0031267	2	22	0.0338748	0.139773	FLNA|RCC2	http://amigo.geneontology.org/amigo/term/GO:0031267
zymogen activation	Gene Ontology	GO:0031638	2	22	0.0338748	0.139773	PRSS12|FURIN	http://amigo.geneontology.org/amigo/term/GO:0031638
gene expression	Gene Ontology	GO:0010467	2	22	0.0338748	0.139773	LTB|HOXA3	http://amigo.geneontology.org/amigo/term/GO:0010467
C-C chemokine binding	Gene Ontology	GO:0019957	2	22	0.0338748	0.139773	CCR6|CXCR4	http://amigo.geneontology.org/amigo/term/GO:0019957
mammary gland development	Gene Ontology	GO:0030879	2	22	0.0338748	0.139773	ITGA2|HOXB9	http://amigo.geneontology.org/amigo/term/GO:0030879
apical junction complex	Gene Ontology	GO:0043296	2	22	0.0338748	0.139773	SHROOM1|SAPCD2	http://amigo.geneontology.org/amigo/term/GO:0043296
calcium ion homeostasis	Gene Ontology	GO:0055074	2	22	0.0338748	0.139773	S100A14|TMTC2	http://amigo.geneontology.org/amigo/term/GO:0055074
cellular response to insulin stimulus	Gene Ontology	GO:0032869	4	97	0.0346213	0.142475	SRC|INSR|XBP1|PKM	http://amigo.geneontology.org/amigo/term/GO:0032869
sarcolemma	Gene Ontology	GO:0042383	4	97	0.0346213	0.142475	KCNB1|MUC1|SLC7A11|SLC2A1	http://amigo.geneontology.org/amigo/term/GO:0042383
actin cytoskeleton	Gene Ontology	GO:0015629	7	245	0.0347211	0.142524	ARPC1B|LSP1|MYO1A|CFL1|FLNA|STK17B|MYO7B	http://amigo.geneontology.org/amigo/term/GO:0015629
protein processing	Gene Ontology	GO:0016485	3	56	0.0348168	0.142524	COMP|DYNC2H1|FURIN	http://amigo.geneontology.org/amigo/term/GO:0016485
substrate adhesion-dependent cell spreading	Gene Ontology	GO:0034446	3	56	0.0348168	0.142524	LAMB1|SRC|FZD7	http://amigo.geneontology.org/amigo/term/GO:0034446
Rho protein signal transduction	Gene Ontology	GO:0007266	3	56	0.0348168	0.142524	EPS8L3|ADGRG1|CFL1	http://amigo.geneontology.org/amigo/term/GO:0007266
hormone activity	Gene Ontology	GO:0005179	4	98	0.0357026	0.145575	UTS2|GUCA2A|VGF|PTHLH	http://amigo.geneontology.org/amigo/term/GO:0005179
response to ethanol	Gene Ontology	GO:0045471	4	98	0.0357026	0.145575	AACS|MUC1|G6PD|SOD1	http://amigo.geneontology.org/amigo/term/GO:0045471
positive regulation of canonical Wnt signaling pathway	Gene Ontology	GO:0090263	5	145	0.0363123	0.147023	ARNTL|SRC|WNT10B|EGFR|SFRP4	http://amigo.geneontology.org/amigo/term/GO:0090263
Rac GTPase binding	Gene Ontology	GO:0048365	3	57	0.03633	0.147023	FLNA|RCC2|SOD1	http://amigo.geneontology.org/amigo/term/GO:0048365
phospholipid metabolic process	Gene Ontology	GO:0006644	3	57	0.03633	0.147023	LPCAT4|PLA2G2D|PLBD1	http://amigo.geneontology.org/amigo/term/GO:0006644
positive regulation of epidermal growth factor receptor signaling pathway	Gene Ontology	GO:0045742	2	23	0.0365311	0.147023	PLAUR|MMP9	http://amigo.geneontology.org/amigo/term/GO:0045742
positive regulation of apoptotic signaling pathway	Gene Ontology	GO:2001235	2	23	0.0365311	0.147023	NFATC4|PRKCD	http://amigo.geneontology.org/amigo/term/GO:2001235
maternal process involved in female pregnancy	Gene Ontology	GO:0060135	2	23	0.0365311	0.147023	LGALS9|ITGA3	http://amigo.geneontology.org/amigo/term/GO:0060135
bone resorption	Gene Ontology	GO:0045453	2	23	0.0365311	0.147023	SRC|ADRB2	http://amigo.geneontology.org/amigo/term/GO:0045453
motile cilium assembly	Gene Ontology	GO:0044458	2	23	0.0365311	0.147023	FOXJ1|LRRC6	http://amigo.geneontology.org/amigo/term/GO:0044458
chemokine binding	Gene Ontology	GO:0019956	2	23	0.0365311	0.147023	CCR6|CXCR4	http://amigo.geneontology.org/amigo/term/GO:0019956
regulation of Wnt signaling pathway	Gene Ontology	GO:0030111	2	23	0.0365311	0.147023	RUNX1|ITGA3	http://amigo.geneontology.org/amigo/term/GO:0030111
peptidyl-tyrosine dephosphorylation	Gene Ontology	GO:0035335	4	99	0.0368032	0.147736	DUSP4|UBASH3B|MTMR2|PTPRT	http://amigo.geneontology.org/amigo/term/GO:0035335
regulation of membrane potential	Gene Ontology	GO:0042391	4	99	0.0368032	0.147736	CHRNA4|CHRNA5|CHRNA7|GABRP	http://amigo.geneontology.org/amigo/term/GO:0042391
transmembrane signaling receptor activity	Gene Ontology	GO:0004888	5	146	0.037198	0.148936	EGFR|LRP8|CLDN4|TNFRSF11A|SEMA4D	http://amigo.geneontology.org/amigo/term/GO:0004888
positive regulation of cytosolic calcium ion concentration	Gene Ontology	GO:0007204	5	146	0.037198	0.148936	LPAR2|ITPR3|GPR35|CCR6|CXCR4	http://amigo.geneontology.org/amigo/term/GO:0007204
determination of left/right symmetry	Gene Ontology	GO:0007368	3	58	0.0378766	0.150482	DNAAF4|DYNC2H1|FOXJ1	http://amigo.geneontology.org/amigo/term/GO:0007368
phosphatidylserine binding	Gene Ontology	GO:0001786	3	58	0.0378766	0.150482	SYT8|GRAMD1B|ANXA13	http://amigo.geneontology.org/amigo/term/GO:0001786
humoral immune response	Gene Ontology	GO:0006959	3	58	0.0378766	0.150482	FOXJ1|CD83|CCR6	http://amigo.geneontology.org/amigo/term/GO:0006959
brush border membrane	Gene Ontology	GO:0031526	3	58	0.0378766	0.150482	MFSD10|MUC1|SLC7A11	http://amigo.geneontology.org/amigo/term/GO:0031526
protein tyrosine phosphatase activity	Gene Ontology	GO:0004725	4	100	0.0379232	0.150482	DUSP4|UBASH3B|MTMR2|PTPRT	http://amigo.geneontology.org/amigo/term/GO:0004725
PML body	Gene Ontology	GO:0016605	4	101	0.0390626	0.153453	ZBTB16|ARNTL|ELF4|TRIM16	http://amigo.geneontology.org/amigo/term/GO:0016605
structural constituent of cytoskeleton	Gene Ontology	GO:0005200	4	101	0.0390626	0.153453	TUBA1C|ARPC1B|TUBB3|VIM	http://amigo.geneontology.org/amigo/term/GO:0005200
phosphorylation	Gene Ontology	GO:0016310	4	101	0.0390626	0.153453	EPHB2|SPHK1|PAPSS2|CKMT1A	http://amigo.geneontology.org/amigo/term/GO:0016310
nuclear body	Gene Ontology	GO:0016604	8	307	0.0391906	0.153453	ZBTB16|HR|S100P|HOXB7|SNCG|ESRP1|ELF4|CLIC3	http://amigo.geneontology.org/amigo/term/GO:0016604
cochlea morphogenesis	Gene Ontology	GO:0090103	2	24	0.0392646	0.153453	TIFAB|CTHRC1	http://amigo.geneontology.org/amigo/term/GO:0090103
decidualization	Gene Ontology	GO:0046697	2	24	0.0392646	0.153453	SLC7A11|SCG2	http://amigo.geneontology.org/amigo/term/GO:0046697
positive regulation of receptor internalization	Gene Ontology	GO:0002092	2	24	0.0392646	0.153453	INSR|SFRP4	http://amigo.geneontology.org/amigo/term/GO:0002092
actin-dependent ATPase activity	Gene Ontology	GO:0030898	2	24	0.0392646	0.153453	MYO1A|MYO7B	http://amigo.geneontology.org/amigo/term/GO:0030898
cellular response to fatty acid	Gene Ontology	GO:0071398	2	24	0.0392646	0.153453	SRC|PTAFR	http://amigo.geneontology.org/amigo/term/GO:0071398
positive regulation of protein autophosphorylation	Gene Ontology	GO:0031954	2	24	0.0392646	0.153453	SRC|GPNMB	http://amigo.geneontology.org/amigo/term/GO:0031954
phospholipid biosynthetic process	Gene Ontology	GO:0008654	2	24	0.0392646	0.153453	LPCAT4|LPCAT1	http://amigo.geneontology.org/amigo/term/GO:0008654
positive regulation of epithelial cell proliferation	Gene Ontology	GO:0050679	3	59	0.0394562	0.153622	LAMB1|MYC|EGFR	http://amigo.geneontology.org/amigo/term/GO:0050679
rough endoplasmic reticulum	Gene Ontology	GO:0005791	3	59	0.0394562	0.153622	PTGDS|SLC7A11|PKM	http://amigo.geneontology.org/amigo/term/GO:0005791
protein homotetramerization	Gene Ontology	GO:0051289	3	59	0.0394562	0.153622	GNMT|CTH|PFKP	http://amigo.geneontology.org/amigo/term/GO:0051289
mitochondrion	Gene Ontology	GO:0005739	23	1258	0.040779	0.158314	NIT1|EFHD1|PRDX6|CKMT1A|FH|HSPA1A|CHCHD10|PYCR1|YWHAZ|CLIC1|DISC1|PKM|SRC|HOXB9|SOD1|MRPS36|SCCPDH|BCAT1|ALDH7A1|NAT8L|MTHFD2|SLC7A11|DCAF8	http://amigo.geneontology.org/amigo/term/GO:0005739
axon terminus	Gene Ontology	GO:0043679	3	60	0.0410689	0.158314	SNCG|ITGA2|GAD1	http://amigo.geneontology.org/amigo/term/GO:0043679
nucleotide binding	Gene Ontology	GO:0000166	3	60	0.0410689	0.158314	PRTFDC1|TINAG|IMPDH1	http://amigo.geneontology.org/amigo/term/GO:0000166
voltage-gated potassium channel activity	Gene Ontology	GO:0005249	3	60	0.0410689	0.158314	LRRC26|KCNB1|KCNF1	http://amigo.geneontology.org/amigo/term/GO:0005249
sperm flagellum	Gene Ontology	GO:0036126	3	60	0.0410689	0.158314	AK8|ATP1B3|CCR6	http://amigo.geneontology.org/amigo/term/GO:0036126
collagen trimer	Gene Ontology	GO:0005581	3	60	0.0410689	0.158314	MBL2|EMILIN2|CTHRC1	http://amigo.geneontology.org/amigo/term/GO:0005581
cartilage development	Gene Ontology	GO:0051216	3	60	0.0410689	0.158314	BMP7|HOXA3|ZBTB16	http://amigo.geneontology.org/amigo/term/GO:0051216
ventricular cardiac muscle tissue morphogenesis	Gene Ontology	GO:0055010	2	25	0.0420731	0.160943	TNNI3|COL11A1	http://amigo.geneontology.org/amigo/term/GO:0055010
retinoic acid metabolic process	Gene Ontology	GO:0042573	2	25	0.0420731	0.160943	UGT1A10|CRABP2	http://amigo.geneontology.org/amigo/term/GO:0042573
cellular amino acid biosynthetic process	Gene Ontology	GO:0008652	2	25	0.0420731	0.160943	PYCR1|NAT8L	http://amigo.geneontology.org/amigo/term/GO:0008652
laminin binding	Gene Ontology	GO:0043236	2	25	0.0420731	0.160943	ITGA2|ITGA3	http://amigo.geneontology.org/amigo/term/GO:0043236
dynein complex	Gene Ontology	GO:0030286	2	25	0.0420731	0.160943	DISC1|DYNC2H1	http://amigo.geneontology.org/amigo/term/GO:0030286
sphingolipid metabolic process	Gene Ontology	GO:0006665	2	25	0.0420731	0.160943	GAL3ST1|SPHK1	http://amigo.geneontology.org/amigo/term/GO:0006665
intracellular signal transduction	Gene Ontology	GO:0035556	9	369	0.0421134	0.160943	SRC|SPHK1|DCLK1|SCG2|PRKCD|MAPK15|UNC13A|STK39|STK17B	http://amigo.geneontology.org/amigo/term/GO:0035556
negative regulation of neuron projection development	Gene Ontology	GO:0010977	3	61	0.0427144	0.16244	SEMA3A|EFNB2|VIM	http://amigo.geneontology.org/amigo/term/GO:0010977
RNA polymerase II transcription regulator complex	Gene Ontology	GO:0090575	3	61	0.0427144	0.16244	MXI1|HOXB9|HMGA1	http://amigo.geneontology.org/amigo/term/GO:0090575
response to wounding	Gene Ontology	GO:0009611	3	61	0.0427144	0.16244	GLI1|ITGB4|HOXB13	http://amigo.geneontology.org/amigo/term/GO:0009611
positive regulation of MAP kinase activity	Gene Ontology	GO:0043406	3	61	0.0427144	0.16244	EGFR|MST1R|SRC	http://amigo.geneontology.org/amigo/term/GO:0043406
muscle contraction	Gene Ontology	GO:0006936	4	105	0.043814	0.166012	TNNT1|UTS2|SLC6A8|TNNI3	http://amigo.geneontology.org/amigo/term/GO:0006936
axoneme	Gene Ontology	GO:0005930	4	105	0.043814	0.166012	MAPK15|AK8|DYNC2H1|GLI1	http://amigo.geneontology.org/amigo/term/GO:0005930
neuron projection morphogenesis	Gene Ontology	GO:0048812	3	62	0.0443925	0.167474	BMP7|EGFR|DCLK1	http://amigo.geneontology.org/amigo/term/GO:0048812
endocytic vesicle	Gene Ontology	GO:0030139	3	62	0.0443925	0.167474	LPAR2|SPHK1|EGFR	http://amigo.geneontology.org/amigo/term/GO:0030139
phospholipase A2 activity (consuming 1,2-dipalmitoylphosphatidylcholine)	Gene Ontology	GO:0102567	2	26	0.0449545	0.167474	PRDX6|PLA2G2D	http://amigo.geneontology.org/amigo/term/GO:0102567
positive regulation of cytokine production	Gene Ontology	GO:0001819	2	26	0.0449545	0.167474	SOD1|SLC11A1	http://amigo.geneontology.org/amigo/term/GO:0001819
chondroitin sulfate biosynthetic process	Gene Ontology	GO:0030206	2	26	0.0449545	0.167474	VCAN|XYLT1	http://amigo.geneontology.org/amigo/term/GO:0030206
positive regulation of phosphorylation	Gene Ontology	GO:0042327	2	26	0.0449545	0.167474	EGFR|FZD7	http://amigo.geneontology.org/amigo/term/GO:0042327
negative regulation of Ras protein signal transduction	Gene Ontology	GO:0046580	2	26	0.0449545	0.167474	EPHB2|RASAL1	http://amigo.geneontology.org/amigo/term/GO:0046580
phospholipase A2 activity consuming 1,2-dioleoylphosphatidylethanolamine)	Gene Ontology	GO:0102568	2	26	0.0449545	0.167474	PRDX6|PLA2G2D	http://amigo.geneontology.org/amigo/term/GO:0102568
response to electrical stimulus	Gene Ontology	GO:0051602	2	26	0.0449545	0.167474	SRC|DISC1	http://amigo.geneontology.org/amigo/term/GO:0051602
positive regulation of microtubule polymerization	Gene Ontology	GO:0031116	2	26	0.0449545	0.167474	ARL2|FES	http://amigo.geneontology.org/amigo/term/GO:0031116
cellular response to unfolded protein	Gene Ontology	GO:0034620	2	26	0.0449545	0.167474	HSPA1A|HSPA6	http://amigo.geneontology.org/amigo/term/GO:0034620
cellular response to glucagon stimulus	Gene Ontology	GO:0071377	2	26	0.0449545	0.167474	ASS1|ADCY3	http://amigo.geneontology.org/amigo/term/GO:0071377
skeletal muscle contraction	Gene Ontology	GO:0003009	2	26	0.0449545	0.167474	TNNT1|TNNI3	http://amigo.geneontology.org/amigo/term/GO:0003009
receptor clustering	Gene Ontology	GO:0043113	2	26	0.0449545	0.167474	FLNA|DLG3	http://amigo.geneontology.org/amigo/term/GO:0043113
osteoblast differentiation	Gene Ontology	GO:0001649	4	106	0.0450503	0.16763	GLI1|CREB3L1|VCAN|GPNMB	http://amigo.geneontology.org/amigo/term/GO:0001649
positive regulation of interferon-gamma production	Gene Ontology	GO:0032729	3	63	0.046103	0.170933	LGALS9|RIPK2|SLC11A1	http://amigo.geneontology.org/amigo/term/GO:0032729
protease binding	Gene Ontology	GO:0002020	4	107	0.046306	0.171481	COMP|ITGA3|MBL2|FURIN	http://amigo.geneontology.org/amigo/term/GO:0002020
fatty acid metabolic process	Gene Ontology	GO:0006631	3	64	0.0478457	0.173682	AACS|CYP4F11|FA2H	http://amigo.geneontology.org/amigo/term/GO:0006631
protein folding chaperone	Gene Ontology	GO:0044183	2	27	0.0479066	0.173682	HSPA1A|HSPA6	http://amigo.geneontology.org/amigo/term/GO:0044183
cAMP-mediated signaling	Gene Ontology	GO:0019933	2	27	0.0479066	0.173682	GAL|EIF4EBP2	http://amigo.geneontology.org/amigo/term/GO:0019933
bone morphogenesis	Gene Ontology	GO:0060349	2	27	0.0479066	0.173682	MSX1|SFRP4	http://amigo.geneontology.org/amigo/term/GO:0060349
response to gamma radiation	Gene Ontology	GO:0010332	2	27	0.0479066	0.173682	MYC|SCG2	http://amigo.geneontology.org/amigo/term/GO:0010332
pituitary gland development	Gene Ontology	GO:0021983	2	27	0.0479066	0.173682	MSX1|GLI1	http://amigo.geneontology.org/amigo/term/GO:0021983
positive regulation of cell-matrix adhesion	Gene Ontology	GO:0001954	2	27	0.0479066	0.173682	DISC1|FERMT1	http://amigo.geneontology.org/amigo/term/GO:0001954
synaptic membrane	Gene Ontology	GO:0097060	2	27	0.0479066	0.173682	ITGA3|MTMR2	http://amigo.geneontology.org/amigo/term/GO:0097060
regulation of defense response to virus by virus	Gene Ontology	GO:0050690	2	27	0.0479066	0.173682	AP1M2|PACS1	http://amigo.geneontology.org/amigo/term/GO:0050690
negative regulation of JNK cascade	Gene Ontology	GO:0046329	2	27	0.0479066	0.173682	MECOM|SCG2	http://amigo.geneontology.org/amigo/term/GO:0046329
bile acid biosynthetic process	Gene Ontology	GO:0006699	2	27	0.0479066	0.173682	OSBPL3|OSBPL7	http://amigo.geneontology.org/amigo/term/GO:0006699
positive regulation of G2/M transition of mitotic cell cycle	Gene Ontology	GO:0010971	2	27	0.0479066	0.173682	WNT10B|RCC2	http://amigo.geneontology.org/amigo/term/GO:0010971
embryonic pattern specification	Gene Ontology	GO:0009880	2	27	0.0479066	0.173682	BMP7|ZBTB16	http://amigo.geneontology.org/amigo/term/GO:0009880
misfolded protein binding	Gene Ontology	GO:0051787	2	27	0.0479066	0.173682	HSPA1A|HSPA6	http://amigo.geneontology.org/amigo/term/GO:0051787
lipid transporter activity	Gene Ontology	GO:0005319	2	27	0.0479066	0.173682	ABCA12|ABCA3	http://amigo.geneontology.org/amigo/term/GO:0005319
cytokine production	Gene Ontology	GO:0001816	2	27	0.0479066	0.173682	NFATC4|PTAFR	http://amigo.geneontology.org/amigo/term/GO:0001816
negative regulation of gene expression	Gene Ontology	GO:0010629	6	210	0.0486133	0.176039	RUNX1|NR0B2|LGALS9|FERMT1|OVOL2|CREB3L1	http://amigo.geneontology.org/amigo/term/GO:0010629
response to insulin	Gene Ontology	GO:0032868	3	65	0.0496203	0.178896	VGF|GAL|SLC2A1	http://amigo.geneontology.org/amigo/term/GO:0032868
I-kappaB kinase/NF-kappaB signaling	Gene Ontology	GO:0007249	3	65	0.0496203	0.178896	TIFAB|CARD11|RIPK2	http://amigo.geneontology.org/amigo/term/GO:0007249
actin binding	Gene Ontology	GO:0003779	7	266	0.0496327	0.178896	PDLIM4|CGN|LSP1|TNNI3|CXCR4|S100A4|EPS8L3	http://amigo.geneontology.org/amigo/term/GO:0003779
cilium	Gene Ontology	GO:0005929	6	212	0.0504161	0.18151	MLF1|ADCY3|LRRC6|ARL2|DYNC2H1|PKM	http://amigo.geneontology.org/amigo/term/GO:0005929
antigen processing and presentation of peptide antigen via MHC class I	Gene Ontology	GO:0002474	2	28	0.0509272	0.182084	SAR1B|ABCB9	http://amigo.geneontology.org/amigo/term/GO:0002474
positive regulation of mitotic nuclear division	Gene Ontology	GO:0045840	2	28	0.0509272	0.182084	INSR|SPHK1	http://amigo.geneontology.org/amigo/term/GO:0045840
calcium-ion regulated exocytosis	Gene Ontology	GO:0017156	2	28	0.0509272	0.182084	SYT8|STX1A	http://amigo.geneontology.org/amigo/term/GO:0017156
microfilament motor activity	Gene Ontology	GO:0000146	2	28	0.0509272	0.182084	MYO1A|MYO7B	http://amigo.geneontology.org/amigo/term/GO:0000146
neuronal cell body membrane	Gene Ontology	GO:0032809	2	28	0.0509272	0.182084	INSR|KCNB1	http://amigo.geneontology.org/amigo/term/GO:0032809
midbody	Gene Ontology	GO:0030496	5	160	0.0509896	0.182097	RCC2|CXCR4|SCCPDH|SLC2A1|CEP126	http://amigo.geneontology.org/amigo/term/GO:0030496
positive regulation of NIK/NF-kappaB signaling	Gene Ontology	GO:1901224	3	66	0.0514267	0.183027	SPHK1|EGFR|LGALS9	http://amigo.geneontology.org/amigo/term/GO:1901224
p53 binding	Gene Ontology	GO:0002039	3	66	0.0514267	0.183027	MSX1|MUC1|TRIM29	http://amigo.geneontology.org/amigo/term/GO:0002039
mitochondrial membrane	Gene Ontology	GO:0031966	4	111	0.0515218	0.183156	MX2|MUC1|NAT8L|BIK	http://amigo.geneontology.org/amigo/term/GO:0031966
RNA polymerase II transcription regulatory region sequence-specific DNA binding	Gene Ontology	GO:0000977	8	327	0.0526763	0.187046	MXI1|CREB3L3|RUNX1|FOSL2|MSX1|PAX9|GLI1|XBP1	http://amigo.geneontology.org/amigo/term/GO:0000977
stimulatory C-type lectin receptor signaling pathway	Gene Ontology	GO:0002223	4	112	0.0528739	0.187533	SRC|CARD11|MUC1|PRKCD	http://amigo.geneontology.org/amigo/term/GO:0002223
cellular response to drug	Gene Ontology	GO:0035690	3	67	0.0532646	0.188141	MYC|EGFR|CXCR4	http://amigo.geneontology.org/amigo/term/GO:0035690
presynaptic membrane	Gene Ontology	GO:0042734	3	67	0.0532646	0.188141	STX1A|ADGRL1|UNC13A	http://amigo.geneontology.org/amigo/term/GO:0042734
extrinsic component of membrane	Gene Ontology	GO:0019898	3	67	0.0532646	0.188141	PLAUR|ANXA13|STK39	http://amigo.geneontology.org/amigo/term/GO:0019898
potassium channel activity	Gene Ontology	GO:0005267	2	29	0.0540142	0.188141	KCNN4|KCNF1	http://amigo.geneontology.org/amigo/term/GO:0005267
regulation of cell motility	Gene Ontology	GO:2000145	2	29	0.0540142	0.188141	EGFR|FES	http://amigo.geneontology.org/amigo/term/GO:2000145
positive regulation of DNA replication	Gene Ontology	GO:0045740	2	29	0.0540142	0.188141	GLI1|EGFR	http://amigo.geneontology.org/amigo/term/GO:0045740
regulation of ERK1 and ERK2 cascade	Gene Ontology	GO:0070372	2	29	0.0540142	0.188141	YWHAZ|EGFR	http://amigo.geneontology.org/amigo/term/GO:0070372
beta-catenin-TCF complex assembly	Gene Ontology	GO:1904837	2	29	0.0540142	0.188141	MYC|SCG2	http://amigo.geneontology.org/amigo/term/GO:1904837
iron ion homeostasis	Gene Ontology	GO:0055072	2	29	0.0540142	0.188141	HEPH|SLC11A1	http://amigo.geneontology.org/amigo/term/GO:0055072
regulation of signal transduction	Gene Ontology	GO:0009966	2	29	0.0540142	0.188141	GPC4|FURIN	http://amigo.geneontology.org/amigo/term/GO:0009966
embryonic hindlimb morphogenesis	Gene Ontology	GO:0035116	2	29	0.0540142	0.188141	MSX1|ZBTB16	http://amigo.geneontology.org/amigo/term/GO:0035116
heterotypic cell-cell adhesion	Gene Ontology	GO:0034113	2	29	0.0540142	0.188141	NRCAM|ITGAX	http://amigo.geneontology.org/amigo/term/GO:0034113
metanephros development	Gene Ontology	GO:0001656	2	29	0.0540142	0.188141	BMP7|HOXA11	http://amigo.geneontology.org/amigo/term/GO:0001656
myelin sheath	Gene Ontology	GO:0043209	2	29	0.0540142	0.188141	ITPR3|MBL2	http://amigo.geneontology.org/amigo/term/GO:0043209
branching involved in blood vessel morphogenesis	Gene Ontology	GO:0001569	2	29	0.0540142	0.188141	SEMA3E|NFATC4	http://amigo.geneontology.org/amigo/term/GO:0001569
feeding behavior	Gene Ontology	GO:0007631	2	29	0.0540142	0.188141	GAL|NPB	http://amigo.geneontology.org/amigo/term/GO:0007631
protein kinase activity	Gene Ontology	GO:0004672	6	216	0.0541432	0.18838	SRC|DCLK1|PRKCD|MAPK15|RIPK2|STK17B	http://amigo.geneontology.org/amigo/term/GO:0004672
potassium ion transport	Gene Ontology	GO:0006813	3	68	0.0551338	0.190971	KCNN4|FXYD3|KCNF1	http://amigo.geneontology.org/amigo/term/GO:0006813
synaptic vesicle membrane	Gene Ontology	GO:0030672	3	68	0.0551338	0.190971	SYT8|SYNGR3|UNC13A	http://amigo.geneontology.org/amigo/term/GO:0030672
intracellular protein transport	Gene Ontology	GO:0006886	7	273	0.0553817	0.191616	STX1A|AP3B2|RAB6D|ARL14|SAR1B|ARL4C|ARL4A	http://amigo.geneontology.org/amigo/term/GO:0006886
glucose homeostasis	Gene Ontology	GO:0042593	4	115	0.0570451	0.19518	INSR|FABP5|KCNB1|VGF	http://amigo.geneontology.org/amigo/term/GO:0042593
response to tumor necrosis factor	Gene Ontology	GO:0034612	2	30	0.0571656	0.19518	SPHK1|TNFRSF11A	http://amigo.geneontology.org/amigo/term/GO:0034612
base-excision repair	Gene Ontology	GO:0006284	2	30	0.0571656	0.19518	HMGA2|HMGA1	http://amigo.geneontology.org/amigo/term/GO:0006284
positive regulation of vasoconstriction	Gene Ontology	GO:0045907	2	30	0.0571656	0.19518	EGFR|PTAFR	http://amigo.geneontology.org/amigo/term/GO:0045907
brown fat cell differentiation	Gene Ontology	GO:0050873	2	30	0.0571656	0.19518	ADRB2|ARL4A	http://amigo.geneontology.org/amigo/term/GO:0050873
pattern specification process	Gene Ontology	GO:0007389	2	30	0.0571656	0.19518	FOXJ1|FST	http://amigo.geneontology.org/amigo/term/GO:0007389
digestion	Gene Ontology	GO:0007586	2	30	0.0571656	0.19518	UTS2|GUCA2A	http://amigo.geneontology.org/amigo/term/GO:0007586
establishment of mitotic spindle orientation	Gene Ontology	GO:0000132	2	30	0.0571656	0.19518	SAPCD2|MISP	http://amigo.geneontology.org/amigo/term/GO:0000132
dendrite membrane	Gene Ontology	GO:0032590	2	30	0.0571656	0.19518	INSR|KCNB1	http://amigo.geneontology.org/amigo/term/GO:0032590
neuropeptide hormone activity	Gene Ontology	GO:0005184	2	30	0.0571656	0.19518	VGF|GAL	http://amigo.geneontology.org/amigo/term/GO:0005184
mitogen-activated protein kinase binding	Gene Ontology	GO:0051019	2	30	0.0571656	0.19518	DUSP4|PTAFR	http://amigo.geneontology.org/amigo/term/GO:0051019
actin cytoskeleton organization	Gene Ontology	GO:0030036	5	166	0.057703	0.196798	PDLIM4|FOXJ1|SHROOM1|ARHGEF10L|CFL1	http://amigo.geneontology.org/amigo/term/GO:0030036
microvillus	Gene Ontology	GO:0005902	3	70	0.0589648	0.199902	USH1C|MYO1A|MYO7B	http://amigo.geneontology.org/amigo/term/GO:0005902
cerebral cortex development	Gene Ontology	GO:0021987	3	70	0.0589648	0.199902	FLNA|LRP8|SLC2A1	http://amigo.geneontology.org/amigo/term/GO:0021987
regulation of autophagy	Gene Ontology	GO:0010506	3	70	0.0589648	0.199902	MAPK15|OSBPL7|XBP1	http://amigo.geneontology.org/amigo/term/GO:0010506
response to zinc ion	Gene Ontology	GO:0010043	2	31	0.0603795	0.199902	ASS1|CRIP1	http://amigo.geneontology.org/amigo/term/GO:0010043
endothelial cell migration	Gene Ontology	GO:0043542	2	31	0.0603795	0.199902	SCG2|S100P	http://amigo.geneontology.org/amigo/term/GO:0043542
embryonic skeletal system development	Gene Ontology	GO:0048706	2	31	0.0603795	0.199902	HOXC6|XYLT1	http://amigo.geneontology.org/amigo/term/GO:0048706
tumor necrosis factor receptor binding	Gene Ontology	GO:0005164	2	31	0.0603795	0.199902	LTB|TNFSF15	http://amigo.geneontology.org/amigo/term/GO:0005164
cellular response to dexamethasone stimulus	Gene Ontology	GO:0071549	2	31	0.0603795	0.199902	ASS1|EGFR	http://amigo.geneontology.org/amigo/term/GO:0071549
ERBB2 signaling pathway	Gene Ontology	GO:0038128	2	31	0.0603795	0.199902	SRC|EGFR	http://amigo.geneontology.org/amigo/term/GO:0038128
face morphogenesis	Gene Ontology	GO:0060325	2	31	0.0603795	0.199902	MSX1|PAX9	http://amigo.geneontology.org/amigo/term/GO:0060325
response to amino acid	Gene Ontology	GO:0043200	2	31	0.0603795	0.199902	MUC1|CFL1	http://amigo.geneontology.org/amigo/term/GO:0043200
anterograde axonal transport	Gene Ontology	GO:0008089	2	31	0.0603795	0.199902	AP3B2|SOD1	http://amigo.geneontology.org/amigo/term/GO:0008089
positive regulation of cyclin-dependent protein serine/threonine kinase activity	Gene Ontology	GO:0045737	2	31	0.0603795	0.199902	SRC|EGFR	http://amigo.geneontology.org/amigo/term/GO:0045737
T cell differentiation in thymus	Gene Ontology	GO:0033077	2	31	0.0603795	0.199902	PRR7|FZD7	http://amigo.geneontology.org/amigo/term/GO:0033077
response to testosterone	Gene Ontology	GO:0033574	2	31	0.0603795	0.199902	CA9|HOXB13	http://amigo.geneontology.org/amigo/term/GO:0033574
ligand-gated ion channel activity	Gene Ontology	GO:0015276	2	31	0.0603795	0.199902	CHRNA4|CHRNA5	http://amigo.geneontology.org/amigo/term/GO:0015276
negative regulation of protein phosphorylation	Gene Ontology	GO:0001933	3	71	0.0609261	0.199902	EPHB2|PRR5L|SCG2	http://amigo.geneontology.org/amigo/term/GO:0001933
actin filament organization	Gene Ontology	GO:0007015	4	118	0.0613877	0.199902	SHROOM1|TMSB10|MYO1A|MYO7B	http://amigo.geneontology.org/amigo/term/GO:0007015
microtubule-based process	Gene Ontology	GO:0007017	2	32	0.0636538	0.199902	TUBA1C|TUBB3	http://amigo.geneontology.org/amigo/term/GO:0007017
chaperone cofactor-dependent protein refolding	Gene Ontology	GO:0051085	2	32	0.0636538	0.199902	HSPA1A|HSPA6	http://amigo.geneontology.org/amigo/term/GO:0051085
activation of protein kinase B activity	Gene Ontology	GO:0032148	2	32	0.0636538	0.199902	SRC|INSR	http://amigo.geneontology.org/amigo/term/GO:0032148
liver regeneration	Gene Ontology	GO:0097421	2	32	0.0636538	0.199902	GLI1|EGFR	http://amigo.geneontology.org/amigo/term/GO:0097421
acetylglucosaminyltransferase activity	Gene Ontology	GO:0008375	2	32	0.0636538	0.199902	B3GNT5|LFNG	http://amigo.geneontology.org/amigo/term/GO:0008375
Rho GTPase binding	Gene Ontology	GO:0017048	2	32	0.0636538	0.199902	FLNA|YBX3	http://amigo.geneontology.org/amigo/term/GO:0017048
ceramide biosynthetic process	Gene Ontology	GO:0046513	2	32	0.0636538	0.199902	DEGS2|FA2H	http://amigo.geneontology.org/amigo/term/GO:0046513
microtubule bundle formation	Gene Ontology	GO:0001578	2	32	0.0636538	0.199902	NAV1|FES	http://amigo.geneontology.org/amigo/term/GO:0001578
regulation of microtubule cytoskeleton organization	Gene Ontology	GO:0070507	2	32	0.0636538	0.199902	RASSF1|EFNA5	http://amigo.geneontology.org/amigo/term/GO:0070507
microtubule associated complex	Gene Ontology	GO:0005875	2	32	0.0636538	0.199902	CLIP2|LRP8	http://amigo.geneontology.org/amigo/term/GO:0005875
transcription regulator complex	Gene Ontology	GO:0005667	6	226	0.0641739	0.199902	ARNTL|NFATC4|HOXA11|HOXA10|HMGA1|HOXB13	http://amigo.geneontology.org/amigo/term/GO:0005667
post-translational protein modification	Gene Ontology	GO:0043687	8	342	0.0645372	0.199902	FBXO41|ZBTB16|VGF|VCAN|SCG2|LAMB1|DCAF8|TMEM132A	http://amigo.geneontology.org/amigo/term/GO:0043687
mRNA 3'-UTR binding	Gene Ontology	GO:0003730	3	73	0.064939	0.199902	IGF2BP3|YBX3|CPEB3	http://amigo.geneontology.org/amigo/term/GO:0003730
autophagosome	Gene Ontology	GO:0005776	3	73	0.064939	0.199902	MAPK15|ATG9B|OSBPL7	http://amigo.geneontology.org/amigo/term/GO:0005776
tumor necrosis factor-mediated signaling pathway	Gene Ontology	GO:0033209	4	121	0.0658999	0.199902	TNFRSF18|TNFRSF11A|TNFSF15|LTB	http://amigo.geneontology.org/amigo/term/GO:0033209
translation	Gene Ontology	GO:0006412	5	173	0.0661447	0.199902	IGF2BP3|MRPS36|EGFR|CPEB3|EIF4EBP2	http://amigo.geneontology.org/amigo/term/GO:0006412
blood coagulation	Gene Ontology	GO:0007596	5	173	0.0661447	0.199902	PLAUR|ITGA2|CYP4F11|PAPSS2|SERPINE2	http://amigo.geneontology.org/amigo/term/GO:0007596
chemoattractant activity	Gene Ontology	GO:0042056	2	33	0.0669866	0.199902	SCG2|GPNMB	http://amigo.geneontology.org/amigo/term/GO:0042056
protein localization to cilium	Gene Ontology	GO:0061512	2	33	0.0669866	0.199902	LRRC6|DYNC2H1	http://amigo.geneontology.org/amigo/term/GO:0061512
ATP metabolic process	Gene Ontology	GO:0046034	2	33	0.0669866	0.199902	AMPD3|HSPA1A	http://amigo.geneontology.org/amigo/term/GO:0046034
positive regulation of cytosolic calcium ion concentration involved in phospholipase C-activating G protein-coupled signaling pathway	Gene Ontology	GO:0051482	2	33	0.0669866	0.199902	GPR17|GPR35	http://amigo.geneontology.org/amigo/term/GO:0051482
glycolytic process	Gene Ontology	GO:0006096	2	33	0.0669866	0.199902	ENO2|PKM	http://amigo.geneontology.org/amigo/term/GO:0006096
cellular response to BMP stimulus	Gene Ontology	GO:0071773	2	33	0.0669866	0.199902	BMP7|SPINT1	http://amigo.geneontology.org/amigo/term/GO:0071773
cell surface receptor signaling pathway	Gene Ontology	GO:0007166	7	286	0.0671178	0.199902	EGFR|SLC7A11|PTH2R|ADRB2|ADGRG1|ADGRL1|ADGRB2	http://amigo.geneontology.org/amigo/term/GO:0007166
guanyl-nucleotide exchange factor activity	Gene Ontology	GO:0005085	4	123	0.0690015	0.199902	ARHGEF10L|RCC2|SH2D3A|RALGDS	http://amigo.geneontology.org/amigo/term/GO:0005085
regulation of actin cytoskeleton organization	Gene Ontology	GO:0032956	3	75	0.0690704	0.199902	SMIM22|EFNA5|PRKCD	http://amigo.geneontology.org/amigo/term/GO:0032956
negative regulation of canonical Wnt signaling pathway	Gene Ontology	GO:0090090	5	176	0.0699624	0.199902	GLI1|FERMT1|CTHRC1|SFRP4|KREMEN2	http://amigo.geneontology.org/amigo/term/GO:0090090
endoplasmic reticulum exit site	Gene Ontology	GO:0070971	2	34	0.070376	0.199902	SAR1B|SEC16B	http://amigo.geneontology.org/amigo/term/GO:0070971
dendrite morphogenesis	Gene Ontology	GO:0048813	2	34	0.070376	0.199902	PREX2|DCLK1	http://amigo.geneontology.org/amigo/term/GO:0048813
filamentous actin	Gene Ontology	GO:0031941	2	34	0.070376	0.199902	PDLIM4|MYO1A	http://amigo.geneontology.org/amigo/term/GO:0031941
positive regulation of cell death	Gene Ontology	GO:0010942	2	34	0.070376	0.199902	RIPK2|PRR7	http://amigo.geneontology.org/amigo/term/GO:0010942
lung alveolus development	Gene Ontology	GO:0048286	2	34	0.070376	0.199902	ABCA12|SLC7A11	http://amigo.geneontology.org/amigo/term/GO:0048286
lipopolysaccharide-mediated signaling pathway	Gene Ontology	GO:0031663	2	34	0.070376	0.199902	RIPK2|PTAFR	http://amigo.geneontology.org/amigo/term/GO:0031663
positive regulation of telomerase activity	Gene Ontology	GO:0051973	2	34	0.070376	0.199902	MAPK15|MYC	http://amigo.geneontology.org/amigo/term/GO:0051973
activation of phospholipase C activity	Gene Ontology	GO:0007202	2	34	0.070376	0.199902	LPAR2|EGFR	http://amigo.geneontology.org/amigo/term/GO:0007202
B cell proliferation	Gene Ontology	GO:0042100	2	34	0.070376	0.199902	CARD11|PRKCD	http://amigo.geneontology.org/amigo/term/GO:0042100
long-term memory	Gene Ontology	GO:0007616	2	34	0.070376	0.199902	NFATC4|CPEB3	http://amigo.geneontology.org/amigo/term/GO:0007616
stereocilium	Gene Ontology	GO:0032420	2	34	0.070376	0.199902	USH1C|CDH23	http://amigo.geneontology.org/amigo/term/GO:0032420
response to symbiotic bacterium	Gene Ontology	GO:0009609	1	5	0.0704898	0.199902	PTAFR	http://amigo.geneontology.org/amigo/term/GO:0009609
regulation of T cell differentiation in thymus	Gene Ontology	GO:0033081	1	5	0.0704898	0.199902	SOD1	http://amigo.geneontology.org/amigo/term/GO:0033081
corticospinal tract morphogenesis	Gene Ontology	GO:0021957	1	5	0.0704898	0.199902	CDH11	http://amigo.geneontology.org/amigo/term/GO:0021957
L-arginine import across plasma membrane	Gene Ontology	GO:0097638	1	5	0.0704898	0.199902	SLC7A1	http://amigo.geneontology.org/amigo/term/GO:0097638
keratinocyte migration	Gene Ontology	GO:0051546	1	5	0.0704898	0.199902	FERMT1	http://amigo.geneontology.org/amigo/term/GO:0051546
Y-form DNA binding	Gene Ontology	GO:0000403	1	5	0.0704898	0.199902	SCG2	http://amigo.geneontology.org/amigo/term/GO:0000403
lipoxin biosynthetic process	Gene Ontology	GO:2001301	1	5	0.0704898	0.199902	ALOX5AP	http://amigo.geneontology.org/amigo/term/GO:2001301
positive regulation of fertilization	Gene Ontology	GO:1905516	1	5	0.0704898	0.199902	LHFPL2	http://amigo.geneontology.org/amigo/term/GO:1905516
sensory perception of bitter taste	Gene Ontology	GO:0050913	1	5	0.0704898	0.199902	ITPR3	http://amigo.geneontology.org/amigo/term/GO:0050913
branchiomotor neuron axon guidance	Gene Ontology	GO:0021785	1	5	0.0704898	0.199902	SEMA3A	http://amigo.geneontology.org/amigo/term/GO:0021785
response to purine-containing compound	Gene Ontology	GO:0014074	1	5	0.0704898	0.199902	AACS	http://amigo.geneontology.org/amigo/term/GO:0014074
nerve growth factor binding	Gene Ontology	GO:0048406	1	5	0.0704898	0.199902	FURIN	http://amigo.geneontology.org/amigo/term/GO:0048406
positive regulation of microtubule nucleation	Gene Ontology	GO:0090063	1	5	0.0704898	0.199902	HSPA1A	http://amigo.geneontology.org/amigo/term/GO:0090063
negative regulation of T cell differentiation in thymus	Gene Ontology	GO:0033085	1	5	0.0704898	0.199902	FOXJ1	http://amigo.geneontology.org/amigo/term/GO:0033085
musculoskeletal movement	Gene Ontology	GO:0050881	1	5	0.0704898	0.199902	COMP	http://amigo.geneontology.org/amigo/term/GO:0050881
positive regulation of endoplasmic reticulum unfolded protein response	Gene Ontology	GO:1900103	1	5	0.0704898	0.199902	XBP1	http://amigo.geneontology.org/amigo/term/GO:1900103
regulation of myotube differentiation	Gene Ontology	GO:0010830	1	5	0.0704898	0.199902	RBM38	http://amigo.geneontology.org/amigo/term/GO:0010830
lipopolysaccharide immune receptor activity	Gene Ontology	GO:0001875	1	5	0.0704898	0.199902	PTAFR	http://amigo.geneontology.org/amigo/term/GO:0001875
brain-derived neurotrophic factor receptor signaling pathway	Gene Ontology	GO:0031547	1	5	0.0704898	0.199902	NFATC4	http://amigo.geneontology.org/amigo/term/GO:0031547
interleukin-2 production	Gene Ontology	GO:0032623	1	5	0.0704898	0.199902	SLC11A1	http://amigo.geneontology.org/amigo/term/GO:0032623
carbon-sulfur lyase activity	Gene Ontology	GO:0016846	1	5	0.0704898	0.199902	CTH	http://amigo.geneontology.org/amigo/term/GO:0016846
monocyte extravasation	Gene Ontology	GO:0035696	1	5	0.0704898	0.199902	JAML	http://amigo.geneontology.org/amigo/term/GO:0035696
stereocilia ankle link	Gene Ontology	GO:0002141	1	5	0.0704898	0.199902	USH1C	http://amigo.geneontology.org/amigo/term/GO:0002141
cellular response to fructose stimulus	Gene Ontology	GO:0071332	1	5	0.0704898	0.199902	XBP1	http://amigo.geneontology.org/amigo/term/GO:0071332
central region of growth cone	Gene Ontology	GO:0090724	1	5	0.0704898	0.199902	DISC1	http://amigo.geneontology.org/amigo/term/GO:0090724
inositol 1,3,4,5 tetrakisphosphate binding	Gene Ontology	GO:0043533	1	5	0.0704898	0.199902	ITPR3	http://amigo.geneontology.org/amigo/term/GO:0043533
GPI-anchor transamidase complex	Gene Ontology	GO:0042765	1	5	0.0704898	0.199902	PIGS	http://amigo.geneontology.org/amigo/term/GO:0042765
phosphatase inhibitor activity	Gene Ontology	GO:0019212	1	5	0.0704898	0.199902	TESC	http://amigo.geneontology.org/amigo/term/GO:0019212
heterochromatin assembly	Gene Ontology	GO:0031507	1	5	0.0704898	0.199902	HMGA2	http://amigo.geneontology.org/amigo/term/GO:0031507
tyrosine catabolic process	Gene Ontology	GO:0006572	1	5	0.0704898	0.199902	HGD	http://amigo.geneontology.org/amigo/term/GO:0006572
vascular associated smooth muscle contraction	Gene Ontology	GO:0014829	1	5	0.0704898	0.199902	COMP	http://amigo.geneontology.org/amigo/term/GO:0014829
uridine transport	Gene Ontology	GO:0015862	1	5	0.0704898	0.199902	SLC29A2	http://amigo.geneontology.org/amigo/term/GO:0015862
positive regulation of nitric oxide mediated signal transduction	Gene Ontology	GO:0010750	1	5	0.0704898	0.199902	EGFR	http://amigo.geneontology.org/amigo/term/GO:0010750
negative regulation of synaptic plasticity	Gene Ontology	GO:0031914	1	5	0.0704898	0.199902	RIN1	http://amigo.geneontology.org/amigo/term/GO:0031914
regulation of glycogen metabolic process	Gene Ontology	GO:0070873	1	5	0.0704898	0.199902	PHLDA2	http://amigo.geneontology.org/amigo/term/GO:0070873
L-lactate dehydrogenase activity	Gene Ontology	GO:0004459	1	5	0.0704898	0.199902	LDHB	http://amigo.geneontology.org/amigo/term/GO:0004459
collagen binding involved in cell-matrix adhesion	Gene Ontology	GO:0098639	1	5	0.0704898	0.199902	ITGA2	http://amigo.geneontology.org/amigo/term/GO:0098639
positive regulation of homotypic cell-cell adhesion	Gene Ontology	GO:0034112	1	5	0.0704898	0.199902	PLAUR	http://amigo.geneontology.org/amigo/term/GO:0034112
calcium activated phosphatidylcholine scrambling	Gene Ontology	GO:0061590	1	5	0.0704898	0.199902	ANO9	http://amigo.geneontology.org/amigo/term/GO:0061590
positive regulation of long-term neuronal synaptic plasticity	Gene Ontology	GO:0048170	1	5	0.0704898	0.199902	EPHB2	http://amigo.geneontology.org/amigo/term/GO:0048170
saliva secretion	Gene Ontology	GO:0046541	1	5	0.0704898	0.199902	KCNN4	http://amigo.geneontology.org/amigo/term/GO:0046541
cytokine production involved in immune response	Gene Ontology	GO:0002367	1	5	0.0704898	0.199902	INAVA	http://amigo.geneontology.org/amigo/term/GO:0002367
pattern recognition receptor signaling pathway	Gene Ontology	GO:0002221	1	5	0.0704898	0.199902	INAVA	http://amigo.geneontology.org/amigo/term/GO:0002221
dorsal root ganglion development	Gene Ontology	GO:1990791	1	5	0.0704898	0.199902	TUBB3	http://amigo.geneontology.org/amigo/term/GO:1990791
porin activity	Gene Ontology	GO:0015288	1	5	0.0704898	0.199902	TOMM40L	http://amigo.geneontology.org/amigo/term/GO:0015288
positive regulation of chondrocyte proliferation	Gene Ontology	GO:1902732	1	5	0.0704898	0.199902	COMP	http://amigo.geneontology.org/amigo/term/GO:1902732
positive regulation of cell projection organization	Gene Ontology	GO:0031346	1	5	0.0704898	0.199902	ITGA2	http://amigo.geneontology.org/amigo/term/GO:0031346
arginine transmembrane transporter activity	Gene Ontology	GO:0015181	1	5	0.0704898	0.199902	SLC7A1	http://amigo.geneontology.org/amigo/term/GO:0015181
adenylate cyclase-inhibiting dopamine receptor signaling pathway	Gene Ontology	GO:0007195	1	5	0.0704898	0.199902	FLNA	http://amigo.geneontology.org/amigo/term/GO:0007195
purine ribonucleoside salvage	Gene Ontology	GO:0006166	1	5	0.0704898	0.199902	PRTFDC1	http://amigo.geneontology.org/amigo/term/GO:0006166
uridine transmembrane transporter activity	Gene Ontology	GO:0015213	1	5	0.0704898	0.199902	SLC29A2	http://amigo.geneontology.org/amigo/term/GO:0015213
anchored component of presynaptic membrane	Gene Ontology	GO:0099026	1	5	0.0704898	0.199902	GPC4	http://amigo.geneontology.org/amigo/term/GO:0099026
positive regulation of developmental growth	Gene Ontology	GO:0048639	1	5	0.0704898	0.199902	INSR	http://amigo.geneontology.org/amigo/term/GO:0048639
reproductive system development	Gene Ontology	GO:0061458	1	5	0.0704898	0.199902	LRRC6	http://amigo.geneontology.org/amigo/term/GO:0061458
TAP1 binding	Gene Ontology	GO:0046978	1	5	0.0704898	0.199902	ABCB9	http://amigo.geneontology.org/amigo/term/GO:0046978
regulation of timing of cell differentiation	Gene Ontology	GO:0048505	1	5	0.0704898	0.199902	SERPINE2	http://amigo.geneontology.org/amigo/term/GO:0048505
positive regulation of CD4-positive, alpha-beta T cell proliferation	Gene Ontology	GO:2000563	1	5	0.0704898	0.199902	LGALS9	http://amigo.geneontology.org/amigo/term/GO:2000563
flavonoid metabolic process	Gene Ontology	GO:0009812	1	5	0.0704898	0.199902	SULT1A1	http://amigo.geneontology.org/amigo/term/GO:0009812
positive regulation of retinoic acid receptor signaling pathway	Gene Ontology	GO:0048386	1	5	0.0704898	0.199902	TRIM16	http://amigo.geneontology.org/amigo/term/GO:0048386
ossification involved in bone remodeling	Gene Ontology	GO:0043932	1	5	0.0704898	0.199902	CTHRC1	http://amigo.geneontology.org/amigo/term/GO:0043932
basic amino acid transmembrane transport	Gene Ontology	GO:1990822	1	5	0.0704898	0.199902	SLC7A1	http://amigo.geneontology.org/amigo/term/GO:1990822
alpha-beta T cell differentiation	Gene Ontology	GO:0046632	1	5	0.0704898	0.199902	PRR7	http://amigo.geneontology.org/amigo/term/GO:0046632
non-canonical Wnt signaling pathway via JNK cascade	Gene Ontology	GO:0038031	1	5	0.0704898	0.199902	FZD7	http://amigo.geneontology.org/amigo/term/GO:0038031
leukotriene B4 catabolic process	Gene Ontology	GO:0036101	1	5	0.0704898	0.199902	CYP4F11	http://amigo.geneontology.org/amigo/term/GO:0036101
creatine kinase activity	Gene Ontology	GO:0004111	1	5	0.0704898	0.199902	CKMT1A	http://amigo.geneontology.org/amigo/term/GO:0004111
GPI-anchor transamidase activity	Gene Ontology	GO:0003923	1	5	0.0704898	0.199902	PIGS	http://amigo.geneontology.org/amigo/term/GO:0003923
positive regulation of endothelial cell-matrix adhesion via fibronectin	Gene Ontology	GO:1904906	1	5	0.0704898	0.199902	CEACAM6	http://amigo.geneontology.org/amigo/term/GO:1904906
gamma-delta T cell activation	Gene Ontology	GO:0046629	1	5	0.0704898	0.199902	JAML	http://amigo.geneontology.org/amigo/term/GO:0046629
leukotriene-C4 synthase activity	Gene Ontology	GO:0004464	1	5	0.0704898	0.199902	ALOX5AP	http://amigo.geneontology.org/amigo/term/GO:0004464
presynaptic dense core vesicle exocytosis	Gene Ontology	GO:0099525	1	5	0.0704898	0.199902	UNC13A	http://amigo.geneontology.org/amigo/term/GO:0099525
mesodermal cell fate specification	Gene Ontology	GO:0007501	1	5	0.0704898	0.199902	HOXA11	http://amigo.geneontology.org/amigo/term/GO:0007501
establishment of Sertoli cell barrier	Gene Ontology	GO:0097368	1	5	0.0704898	0.199902	FLNA	http://amigo.geneontology.org/amigo/term/GO:0097368
positive regulation of lipophagy	Gene Ontology	GO:1904504	1	5	0.0704898	0.199902	ADRB2	http://amigo.geneontology.org/amigo/term/GO:1904504
trigeminal nerve structural organization	Gene Ontology	GO:0021637	1	5	0.0704898	0.199902	SEMA3A	http://amigo.geneontology.org/amigo/term/GO:0021637
lipid transport across blood-brain barrier	Gene Ontology	GO:1990379	1	5	0.0704898	0.199902	FABP5	http://amigo.geneontology.org/amigo/term/GO:1990379
regulation of transforming growth factor beta activation	Gene Ontology	GO:1901388	1	5	0.0704898	0.199902	ITGB6	http://amigo.geneontology.org/amigo/term/GO:1901388
programmed cell death	Gene Ontology	GO:0012501	1	5	0.0704898	0.199902	PKM	http://amigo.geneontology.org/amigo/term/GO:0012501
piP-body	Gene Ontology	GO:0071547	1	5	0.0704898	0.199902	PIWIL4	http://amigo.geneontology.org/amigo/term/GO:0071547
inner ear auditory receptor cell differentiation	Gene Ontology	GO:0042491	1	5	0.0704898	0.199902	USH1C	http://amigo.geneontology.org/amigo/term/GO:0042491
lysophosphatidic acid receptor activity	Gene Ontology	GO:0070915	1	5	0.0704898	0.199902	LPAR2	http://amigo.geneontology.org/amigo/term/GO:0070915
L-ornithine transmembrane transporter activity	Gene Ontology	GO:0000064	1	5	0.0704898	0.199902	SLC7A1	http://amigo.geneontology.org/amigo/term/GO:0000064
neuregulin binding	Gene Ontology	GO:0038132	1	5	0.0704898	0.199902	ITGB4	http://amigo.geneontology.org/amigo/term/GO:0038132
L-histidine transmembrane transporter activity	Gene Ontology	GO:0005290	1	5	0.0704898	0.199902	SLC7A1	http://amigo.geneontology.org/amigo/term/GO:0005290
positive regulation of protein-containing complex disassembly	Gene Ontology	GO:0043243	1	5	0.0704898	0.199902	INSR	http://amigo.geneontology.org/amigo/term/GO:0043243
leukotriene-B4 20-monooxygenase activity	Gene Ontology	GO:0050051	1	5	0.0704898	0.199902	CYP4F11	http://amigo.geneontology.org/amigo/term/GO:0050051
vestibulocochlear nerve formation	Gene Ontology	GO:0021650	1	5	0.0704898	0.199902	TIFAB	http://amigo.geneontology.org/amigo/term/GO:0021650
alanine transport	Gene Ontology	GO:0032328	1	5	0.0704898	0.199902	SLC6A6	http://amigo.geneontology.org/amigo/term/GO:0032328
calcium activated galactosylceramide scrambling	Gene Ontology	GO:0061591	1	5	0.0704898	0.199902	ANO9	http://amigo.geneontology.org/amigo/term/GO:0061591
animal organ formation	Gene Ontology	GO:0048645	1	5	0.0704898	0.199902	HOXA3	http://amigo.geneontology.org/amigo/term/GO:0048645
positive regulation of histone H4 acetylation	Gene Ontology	GO:0090240	1	5	0.0704898	0.199902	MUC1	http://amigo.geneontology.org/amigo/term/GO:0090240
nephric duct morphogenesis	Gene Ontology	GO:0072178	1	5	0.0704898	0.199902	EFNB2	http://amigo.geneontology.org/amigo/term/GO:0072178
interphotoreceptor matrix	Gene Ontology	GO:0033165	1	5	0.0704898	0.199902	VCAN	http://amigo.geneontology.org/amigo/term/GO:0033165
dichotomous subdivision of terminal units involved in salivary gland branching	Gene Ontology	GO:0060666	1	5	0.0704898	0.199902	SEMA3A	http://amigo.geneontology.org/amigo/term/GO:0060666
peptide transport	Gene Ontology	GO:0015833	1	5	0.0704898	0.199902	ABCB9	http://amigo.geneontology.org/amigo/term/GO:0015833
optic nerve morphogenesis	Gene Ontology	GO:0021631	1	5	0.0704898	0.199902	EPHB2	http://amigo.geneontology.org/amigo/term/GO:0021631
cerebrospinal fluid circulation	Gene Ontology	GO:0090660	1	5	0.0704898	0.199902	LRRC6	http://amigo.geneontology.org/amigo/term/GO:0090660
L-lysine transmembrane transporter activity	Gene Ontology	GO:0015189	1	5	0.0704898	0.199902	SLC7A1	http://amigo.geneontology.org/amigo/term/GO:0015189
phylloquinone catabolic process	Gene Ontology	GO:0042376	1	5	0.0704898	0.199902	CYP4F11	http://amigo.geneontology.org/amigo/term/GO:0042376
norepinephrine binding	Gene Ontology	GO:0051380	1	5	0.0704898	0.199902	ADRB2	http://amigo.geneontology.org/amigo/term/GO:0051380
fructose-6-phosphate binding	Gene Ontology	GO:0070095	1	5	0.0704898	0.199902	PFKP	http://amigo.geneontology.org/amigo/term/GO:0070095
development of primary female sexual characteristics	Gene Ontology	GO:0046545	1	5	0.0704898	0.199902	LHFPL2	http://amigo.geneontology.org/amigo/term/GO:0046545
5'-deoxyribose-5-phosphate lyase activity	Gene Ontology	GO:0051575	1	5	0.0704898	0.199902	HMGA2	http://amigo.geneontology.org/amigo/term/GO:0051575
negative regulation of cholesterol biosynthetic process	Gene Ontology	GO:0045541	1	5	0.0704898	0.199902	SOD1	http://amigo.geneontology.org/amigo/term/GO:0045541
L-lysine transmembrane transport	Gene Ontology	GO:1903401	1	5	0.0704898	0.199902	SLC7A1	http://amigo.geneontology.org/amigo/term/GO:1903401
thorax and anterior abdomen determination	Gene Ontology	GO:0007356	1	5	0.0704898	0.199902	TIFAB	http://amigo.geneontology.org/amigo/term/GO:0007356
negative regulation of transforming growth factor beta1 production	Gene Ontology	GO:0032911	1	5	0.0704898	0.199902	FURIN	http://amigo.geneontology.org/amigo/term/GO:0032911
cartilage development involved in endochondral bone morphogenesis	Gene Ontology	GO:0060351	1	5	0.0704898	0.199902	HOXA11	http://amigo.geneontology.org/amigo/term/GO:0060351
cadmium ion transmembrane transport	Gene Ontology	GO:0070574	1	5	0.0704898	0.199902	SLC11A1	http://amigo.geneontology.org/amigo/term/GO:0070574
acrosin binding	Gene Ontology	GO:0032190	1	5	0.0704898	0.199902	POMZP3	http://amigo.geneontology.org/amigo/term/GO:0032190
receptor serine/threonine kinase binding	Gene Ontology	GO:0033612	1	5	0.0704898	0.199902	GPR17	http://amigo.geneontology.org/amigo/term/GO:0033612
superoxide dismutase activity	Gene Ontology	GO:0004784	1	5	0.0704898	0.199902	SOD1	http://amigo.geneontology.org/amigo/term/GO:0004784
myelin maintenance	Gene Ontology	GO:0043217	1	5	0.0704898	0.199902	CXCR4	http://amigo.geneontology.org/amigo/term/GO:0043217
regulation of vacuole fusion, non-autophagic	Gene Ontology	GO:0032889	1	5	0.0704898	0.199902	ENO2	http://amigo.geneontology.org/amigo/term/GO:0032889
early endosome lumen	Gene Ontology	GO:0031905	1	5	0.0704898	0.199902	PDLIM4	http://amigo.geneontology.org/amigo/term/GO:0031905
postsynaptic endocytic zone membrane	Gene Ontology	GO:0098844	1	5	0.0704898	0.199902	MX2	http://amigo.geneontology.org/amigo/term/GO:0098844
mature conventional dendritic cell differentiation	Gene Ontology	GO:0097029	1	5	0.0704898	0.199902	LGALS9	http://amigo.geneontology.org/amigo/term/GO:0097029
interleukin-10 production	Gene Ontology	GO:0032613	1	5	0.0704898	0.199902	PRKCD	http://amigo.geneontology.org/amigo/term/GO:0032613
negative regulation of glucose transmembrane transport	Gene Ontology	GO:0010829	1	5	0.0704898	0.199902	FABP5	http://amigo.geneontology.org/amigo/term/GO:0010829
regulation of programmed cell death	Gene Ontology	GO:0043067	1	5	0.0704898	0.199902	CXCR4	http://amigo.geneontology.org/amigo/term/GO:0043067
positive regulation of spindle assembly	Gene Ontology	GO:1905832	1	5	0.0704898	0.199902	MAPK15	http://amigo.geneontology.org/amigo/term/GO:1905832
regulation of amyloid precursor protein catabolic process	Gene Ontology	GO:1902991	1	5	0.0704898	0.199902	UNC13A	http://amigo.geneontology.org/amigo/term/GO:1902991
flavone metabolic process	Gene Ontology	GO:0051552	1	5	0.0704898	0.199902	UGT1A10	http://amigo.geneontology.org/amigo/term/GO:0051552
platelet degranulation	Gene Ontology	GO:0002576	4	124	0.07058	0.199902	FLNA|SCCPDH|LHFPL2|SOD1	http://amigo.geneontology.org/amigo/term/GO:0002576
cellular response to tumor necrosis factor	Gene Ontology	GO:0071356	4	125	0.072177	0.204053	CCL18|NPNT|ASS1|YBX3	http://amigo.geneontology.org/amigo/term/GO:0071356
negative regulation of protein binding	Gene Ontology	GO:0032091	3	77	0.0733177	0.204827	DISC1|NFATC4|PRKCD	http://amigo.geneontology.org/amigo/term/GO:0032091
sodium ion transport	Gene Ontology	GO:0006814	3	77	0.0733177	0.204827	SLC13A2|SLC6A8|FXYD3	http://amigo.geneontology.org/amigo/term/GO:0006814
response to cold	Gene Ontology	GO:0009409	2	35	0.0738202	0.204827	VGF|ADRB2	http://amigo.geneontology.org/amigo/term/GO:0009409
cellular response to reactive oxygen species	Gene Ontology	GO:0034614	2	35	0.0738202	0.204827	EGFR|MMP9	http://amigo.geneontology.org/amigo/term/GO:0034614
phosphoprotein binding	Gene Ontology	GO:0051219	2	35	0.0738202	0.204827	SRC|UBASH3B	http://amigo.geneontology.org/amigo/term/GO:0051219
transport	Gene Ontology	GO:0006810	2	35	0.0738202	0.204827	SLC6A8|SLC6A6	http://amigo.geneontology.org/amigo/term/GO:0006810
actin filament bundle assembly	Gene Ontology	GO:0051017	2	35	0.0738202	0.204827	USH1C|SHROOM1	http://amigo.geneontology.org/amigo/term/GO:0051017
negative regulation of extrinsic apoptotic signaling pathway	Gene Ontology	GO:2001237	2	35	0.0738202	0.204827	SRC|SCG2	http://amigo.geneontology.org/amigo/term/GO:2001237
axonogenesis	Gene Ontology	GO:0007409	3	78	0.0754841	0.204827	NRCAM|S100A6|SLITRK3	http://amigo.geneontology.org/amigo/term/GO:0007409
transmembrane transport	Gene Ontology	GO:0055085	7	296	0.0770896	0.204827	ABCA12|ANO9|SLC35F2|GJB3|GJB4|ABCA3|ABCB9	http://amigo.geneontology.org/amigo/term/GO:0055085
cell motility	Gene Ontology	GO:0048870	2	36	0.0773173	0.204827	ITGB4|CFL1	http://amigo.geneontology.org/amigo/term/GO:0048870
cell death	Gene Ontology	GO:0008219	2	36	0.0773173	0.204827	OLR1|FOSL2	http://amigo.geneontology.org/amigo/term/GO:0008219
receptor ligand activity	Gene Ontology	GO:0048018	2	36	0.0773173	0.204827	WNT10B|GPNMB	http://amigo.geneontology.org/amigo/term/GO:0048018
COP9 signalosome	Gene Ontology	GO:0008180	2	36	0.0773173	0.204827	HSPA1A|HSPA6	http://amigo.geneontology.org/amigo/term/GO:0008180
T cell differentiation	Gene Ontology	GO:0030217	2	36	0.0773173	0.204827	JAG2|LFNG	http://amigo.geneontology.org/amigo/term/GO:0030217
endoplasmic reticulum organization	Gene Ontology	GO:0007029	2	36	0.0773173	0.204827	MAPK15|SEC16B	http://amigo.geneontology.org/amigo/term/GO:0007029
cellular response to mechanical stimulus	Gene Ontology	GO:0071260	3	79	0.0776785	0.204827	ITGA2|EGFR|SLC2A1	http://amigo.geneontology.org/amigo/term/GO:0071260
cell-cell junction	Gene Ontology	GO:0005911	5	183	0.079332	0.204827	FLNA|CLDN4|PRKCD|CFL1|MAPK15	http://amigo.geneontology.org/amigo/term/GO:0005911
negative regulation of NF-kappaB transcription factor activity	Gene Ontology	GO:0032088	3	80	0.0799007	0.204827	BMP7|FOXJ1|NLRP2	http://amigo.geneontology.org/amigo/term/GO:0032088
cell cycle arrest	Gene Ontology	GO:0007050	4	130	0.0804349	0.204827	RASSF1|MLF1|WNT10B|MYC	http://amigo.geneontology.org/amigo/term/GO:0007050
anion transmembrane transport	Gene Ontology	GO:0098656	2	37	0.0808656	0.204827	SLC13A2|SLC9A2	http://amigo.geneontology.org/amigo/term/GO:0098656
regulation of synaptic vesicle priming	Gene Ontology	GO:0010807	1	6	0.0817462	0.204827	STX1A	http://amigo.geneontology.org/amigo/term/GO:0010807
positive regulation of NMDA glutamate receptor activity	Gene Ontology	GO:1904783	1	6	0.0817462	0.204827	EPHB2	http://amigo.geneontology.org/amigo/term/GO:1904783
chitinase activity	Gene Ontology	GO:0004568	1	6	0.0817462	0.204827	CHIT1	http://amigo.geneontology.org/amigo/term/GO:0004568
nitric-oxide synthase regulator activity	Gene Ontology	GO:0030235	1	6	0.0817462	0.204827	EGFR	http://amigo.geneontology.org/amigo/term/GO:0030235
positive regulation of transmission of nerve impulse	Gene Ontology	GO:0051971	1	6	0.0817462	0.204827	ITGA2	http://amigo.geneontology.org/amigo/term/GO:0051971
venous blood vessel morphogenesis	Gene Ontology	GO:0048845	1	6	0.0817462	0.204827	EFNB2	http://amigo.geneontology.org/amigo/term/GO:0048845
regulation of nucleocytoplasmic transport	Gene Ontology	GO:0046822	1	6	0.0817462	0.204827	MX2	http://amigo.geneontology.org/amigo/term/GO:0046822
regulation of somitogenesis	Gene Ontology	GO:0014807	1	6	0.0817462	0.204827	LFNG	http://amigo.geneontology.org/amigo/term/GO:0014807
spontaneous neurotransmitter secretion	Gene Ontology	GO:0061669	1	6	0.0817462	0.204827	DOC2A	http://amigo.geneontology.org/amigo/term/GO:0061669
negative regulation of sodium ion transport	Gene Ontology	GO:0010766	1	6	0.0817462	0.204827	SERPINE2	http://amigo.geneontology.org/amigo/term/GO:0010766
lymphocyte proliferation	Gene Ontology	GO:0046651	1	6	0.0817462	0.204827	IMPDH1	http://amigo.geneontology.org/amigo/term/GO:0046651
taurine transport	Gene Ontology	GO:0015734	1	6	0.0817462	0.204827	SLC6A6	http://amigo.geneontology.org/amigo/term/GO:0015734
polysaccharide digestion	Gene Ontology	GO:0044245	1	6	0.0817462	0.204827	CHIT1	http://amigo.geneontology.org/amigo/term/GO:0044245
protein localization to bicellular tight junction	Gene Ontology	GO:1902396	1	6	0.0817462	0.204827	FLNA	http://amigo.geneontology.org/amigo/term/GO:1902396
osteoclast development	Gene Ontology	GO:0036035	1	6	0.0817462	0.204827	SRC	http://amigo.geneontology.org/amigo/term/GO:0036035
cellular response to peptidoglycan	Gene Ontology	GO:0071224	1	6	0.0817462	0.204827	RIPK2	http://amigo.geneontology.org/amigo/term/GO:0071224
glyceraldehyde-3-phosphate dehydrogenase (NAD+) (non-phosphorylating) activity	Gene Ontology	GO:0043878	1	6	0.0817462	0.204827	ALDH7A1	http://amigo.geneontology.org/amigo/term/GO:0043878
4-galactosyl-N-acetylglucosaminide 3-alpha-L-fucosyltransferase activity	Gene Ontology	GO:0017083	1	6	0.0817462	0.204827	FUT4	http://amigo.geneontology.org/amigo/term/GO:0017083
positive regulation of transporter activity	Gene Ontology	GO:0032411	1	6	0.0817462	0.204827	SYNGR3	http://amigo.geneontology.org/amigo/term/GO:0032411
negative regulation of ERBB signaling pathway	Gene Ontology	GO:1901185	1	6	0.0817462	0.204827	EGFR	http://amigo.geneontology.org/amigo/term/GO:1901185
regulation of viral process	Gene Ontology	GO:0050792	1	6	0.0817462	0.204827	CXCR4	http://amigo.geneontology.org/amigo/term/GO:0050792
growth plate cartilage development	Gene Ontology	GO:0003417	1	6	0.0817462	0.204827	COMP	http://amigo.geneontology.org/amigo/term/GO:0003417
cardiac myofibril	Gene Ontology	GO:0097512	1	6	0.0817462	0.204827	TNNI3	http://amigo.geneontology.org/amigo/term/GO:0097512
chitin catabolic process	Gene Ontology	GO:0006032	1	6	0.0817462	0.204827	CHIT1	http://amigo.geneontology.org/amigo/term/GO:0006032
renal absorption	Gene Ontology	GO:0070293	1	6	0.0817462	0.204827	CLDN4	http://amigo.geneontology.org/amigo/term/GO:0070293
positive regulation of dendritic cell differentiation	Gene Ontology	GO:2001200	1	6	0.0817462	0.204827	LGALS9	http://amigo.geneontology.org/amigo/term/GO:2001200
negative regulation of glucocorticoid receptor signaling pathway	Gene Ontology	GO:2000323	1	6	0.0817462	0.204827	ARNTL	http://amigo.geneontology.org/amigo/term/GO:2000323
negative regulation of mast cell degranulation	Gene Ontology	GO:0043305	1	6	0.0817462	0.204827	LGALS9	http://amigo.geneontology.org/amigo/term/GO:0043305
regulation of circadian sleep/wake cycle, sleep	Gene Ontology	GO:0045187	1	6	0.0817462	0.204827	PTGDS	http://amigo.geneontology.org/amigo/term/GO:0045187
sulfur amino acid catabolic process	Gene Ontology	GO:0000098	1	6	0.0817462	0.204827	CTH	http://amigo.geneontology.org/amigo/term/GO:0000098
positive regulation of potassium ion transmembrane transporter activity	Gene Ontology	GO:1901018	1	6	0.0817462	0.204827	ATP1B3	http://amigo.geneontology.org/amigo/term/GO:1901018
molybdopterin cofactor biosynthetic process	Gene Ontology	GO:0032324	1	6	0.0817462	0.204827	MOCS2	http://amigo.geneontology.org/amigo/term/GO:0032324
aspartate metabolic process	Gene Ontology	GO:0006531	1	6	0.0817462	0.204827	ASS1	http://amigo.geneontology.org/amigo/term/GO:0006531
pyruvate biosynthetic process	Gene Ontology	GO:0042866	1	6	0.0817462	0.204827	PKM	http://amigo.geneontology.org/amigo/term/GO:0042866
dopamine uptake	Gene Ontology	GO:0090494	1	6	0.0817462	0.204827	MAPK15	http://amigo.geneontology.org/amigo/term/GO:0090494
T-helper 1 cell differentiation	Gene Ontology	GO:0045063	1	6	0.0817462	0.204827	SEMA4A	http://amigo.geneontology.org/amigo/term/GO:0045063
lactate transmembrane transporter activity	Gene Ontology	GO:0015129	1	6	0.0817462	0.204827	SLC16A3	http://amigo.geneontology.org/amigo/term/GO:0015129
meiotic cohesin complex	Gene Ontology	GO:0030893	1	6	0.0817462	0.204827	SMC1B	http://amigo.geneontology.org/amigo/term/GO:0030893
negative regulation of viral process	Gene Ontology	GO:0048525	1	6	0.0817462	0.204827	MBL2	http://amigo.geneontology.org/amigo/term/GO:0048525
lipid kinase activity	Gene Ontology	GO:0001727	1	6	0.0817462	0.204827	SPHK1	http://amigo.geneontology.org/amigo/term/GO:0001727
cellular response to nutrient	Gene Ontology	GO:0031670	1	6	0.0817462	0.204827	XBP1	http://amigo.geneontology.org/amigo/term/GO:0031670
heterocycle metabolic process	Gene Ontology	GO:0046483	1	6	0.0817462	0.204827	UGT1A10	http://amigo.geneontology.org/amigo/term/GO:0046483
endocardial cushion formation	Gene Ontology	GO:0003272	1	6	0.0817462	0.204827	BMP7	http://amigo.geneontology.org/amigo/term/GO:0003272
long-chain fatty acid binding	Gene Ontology	GO:0036041	1	6	0.0817462	0.204827	PRR7	http://amigo.geneontology.org/amigo/term/GO:0036041
positive regulation of xenophagy	Gene Ontology	GO:1904417	1	6	0.0817462	0.204827	RIPK2	http://amigo.geneontology.org/amigo/term/GO:1904417
negative regulation of cardiac muscle cell differentiation	Gene Ontology	GO:2000726	1	6	0.0817462	0.204827	FZD7	http://amigo.geneontology.org/amigo/term/GO:2000726
BMP signaling pathway involved in heart development	Gene Ontology	GO:0061312	1	6	0.0817462	0.204827	MSX1	http://amigo.geneontology.org/amigo/term/GO:0061312
pyrimidine-containing compound transmembrane transport	Gene Ontology	GO:0072531	1	6	0.0817462	0.204827	SLC29A2	http://amigo.geneontology.org/amigo/term/GO:0072531
regulation of tissue remodeling	Gene Ontology	GO:0034103	1	6	0.0817462	0.204827	GPNMB	http://amigo.geneontology.org/amigo/term/GO:0034103
gap junction-mediated intercellular transport	Gene Ontology	GO:1990349	1	6	0.0817462	0.204827	GJB4	http://amigo.geneontology.org/amigo/term/GO:1990349
positive regulation of T-helper 1 cell differentiation	Gene Ontology	GO:0045627	1	6	0.0817462	0.204827	RIPK2	http://amigo.geneontology.org/amigo/term/GO:0045627
postsynaptic Golgi apparatus	Gene Ontology	GO:0150051	1	6	0.0817462	0.204827	MYO18A	http://amigo.geneontology.org/amigo/term/GO:0150051
negative regulation of B cell activation	Gene Ontology	GO:0050869	1	6	0.0817462	0.204827	FOXJ1	http://amigo.geneontology.org/amigo/term/GO:0050869
peptide cross-linking via chondroitin 4-sulfate glycosaminoglycan	Gene Ontology	GO:0019800	1	6	0.0817462	0.204827	SPOCK2	http://amigo.geneontology.org/amigo/term/GO:0019800
negative regulation of plasminogen activation	Gene Ontology	GO:0010757	1	6	0.0817462	0.204827	SERPINE2	http://amigo.geneontology.org/amigo/term/GO:0010757
regulation of phosphatidylinositol dephosphorylation	Gene Ontology	GO:0060304	1	6	0.0817462	0.204827	MTMR2	http://amigo.geneontology.org/amigo/term/GO:0060304
beta-galactosidase activity	Gene Ontology	GO:0004565	1	6	0.0817462	0.204827	GLB1L2	http://amigo.geneontology.org/amigo/term/GO:0004565
regulation of branching involved in prostate gland morphogenesis	Gene Ontology	GO:0060687	1	6	0.0817462	0.204827	BMP7	http://amigo.geneontology.org/amigo/term/GO:0060687
arachidonic acid binding	Gene Ontology	GO:0050544	1	6	0.0817462	0.204827	ALOX5AP	http://amigo.geneontology.org/amigo/term/GO:0050544
very-low-density lipoprotein particle clearance	Gene Ontology	GO:0034447	1	6	0.0817462	0.204827	APOBR	http://amigo.geneontology.org/amigo/term/GO:0034447
sensory perception of sweet taste	Gene Ontology	GO:0050916	1	6	0.0817462	0.204827	ITPR3	http://amigo.geneontology.org/amigo/term/GO:0050916
negative regulation of lipid biosynthetic process	Gene Ontology	GO:0051055	1	6	0.0817462	0.204827	ASXL3	http://amigo.geneontology.org/amigo/term/GO:0051055
alveolar lamellar body	Gene Ontology	GO:0097208	1	6	0.0817462	0.204827	ABCA3	http://amigo.geneontology.org/amigo/term/GO:0097208
keratin filament binding	Gene Ontology	GO:1990254	1	6	0.0817462	0.204827	VIM	http://amigo.geneontology.org/amigo/term/GO:1990254
regulation of epithelial cell migration	Gene Ontology	GO:0010632	1	6	0.0817462	0.204827	SRC	http://amigo.geneontology.org/amigo/term/GO:0010632
sensory organ development	Gene Ontology	GO:0007423	1	6	0.0817462	0.204827	MYO7B	http://amigo.geneontology.org/amigo/term/GO:0007423
C3HC4-type RING finger domain binding	Gene Ontology	GO:0055131	1	6	0.0817462	0.204827	HSPA1A	http://amigo.geneontology.org/amigo/term/GO:0055131
D-glucose transmembrane transporter activity	Gene Ontology	GO:0055056	1	6	0.0817462	0.204827	SLC2A1	http://amigo.geneontology.org/amigo/term/GO:0055056
prostate epithelial cord arborization involved in prostate glandular acinus morphogenesis	Gene Ontology	GO:0060527	1	6	0.0817462	0.204827	HOXB13	http://amigo.geneontology.org/amigo/term/GO:0060527
manganese ion transmembrane transporter activity	Gene Ontology	GO:0005384	1	6	0.0817462	0.204827	SLC11A1	http://amigo.geneontology.org/amigo/term/GO:0005384
regulation of T cell migration	Gene Ontology	GO:2000404	1	6	0.0817462	0.204827	CCR6	http://amigo.geneontology.org/amigo/term/GO:2000404
neutrophil extravasation	Gene Ontology	GO:0072672	1	6	0.0817462	0.204827	JAML	http://amigo.geneontology.org/amigo/term/GO:0072672
positive regulation of cell proliferation in bone marrow	Gene Ontology	GO:0071864	1	6	0.0817462	0.204827	HMGA2	http://amigo.geneontology.org/amigo/term/GO:0071864
axonogenesis involved in innervation	Gene Ontology	GO:0060385	1	6	0.0817462	0.204827	SEMA3A	http://amigo.geneontology.org/amigo/term/GO:0060385
chromatin assembly or disassembly	Gene Ontology	GO:0006333	1	6	0.0817462	0.204827	CHD3	http://amigo.geneontology.org/amigo/term/GO:0006333
late endosome to Golgi transport	Gene Ontology	GO:0034499	1	6	0.0817462	0.204827	RAB7B	http://amigo.geneontology.org/amigo/term/GO:0034499
L-arginine transmembrane transporter activity	Gene Ontology	GO:0061459	1	6	0.0817462	0.204827	SLC7A1	http://amigo.geneontology.org/amigo/term/GO:0061459
insulin binding	Gene Ontology	GO:0043559	1	6	0.0817462	0.204827	INSR	http://amigo.geneontology.org/amigo/term/GO:0043559
regulation of protein transport	Gene Ontology	GO:0051223	1	6	0.0817462	0.204827	SLC7A11	http://amigo.geneontology.org/amigo/term/GO:0051223
auditory behavior	Gene Ontology	GO:0031223	1	6	0.0817462	0.204827	TIFAB	http://amigo.geneontology.org/amigo/term/GO:0031223
regulation of removal of superoxide radicals	Gene Ontology	GO:2000121	1	6	0.0817462	0.204827	BMP7	http://amigo.geneontology.org/amigo/term/GO:2000121
maintenance of synapse structure	Gene Ontology	GO:0099558	1	6	0.0817462	0.204827	CHCHD10	http://amigo.geneontology.org/amigo/term/GO:0099558
cartilage morphogenesis	Gene Ontology	GO:0060536	1	6	0.0817462	0.204827	MSX1	http://amigo.geneontology.org/amigo/term/GO:0060536
neurotrophin TRKA receptor binding	Gene Ontology	GO:0005168	1	6	0.0817462	0.204827	EFNA5	http://amigo.geneontology.org/amigo/term/GO:0005168
sensory perception of umami taste	Gene Ontology	GO:0050917	1	6	0.0817462	0.204827	ITPR3	http://amigo.geneontology.org/amigo/term/GO:0050917
negative regulation of leukocyte cell-cell adhesion	Gene Ontology	GO:1903038	1	6	0.0817462	0.204827	ASS1	http://amigo.geneontology.org/amigo/term/GO:1903038
regulation of SMAD protein signal transduction	Gene Ontology	GO:0060390	1	6	0.0817462	0.204827	OVOL2	http://amigo.geneontology.org/amigo/term/GO:0060390
choline catabolic process	Gene Ontology	GO:0042426	1	6	0.0817462	0.204827	ALDH7A1	http://amigo.geneontology.org/amigo/term/GO:0042426
response to peptidoglycan	Gene Ontology	GO:0032494	1	6	0.0817462	0.204827	INAVA	http://amigo.geneontology.org/amigo/term/GO:0032494
positive regulation of CD4-positive, alpha-beta T cell differentiation	Gene Ontology	GO:0043372	1	6	0.0817462	0.204827	CD83	http://amigo.geneontology.org/amigo/term/GO:0043372
attachment of GPI anchor to protein	Gene Ontology	GO:0016255	1	6	0.0817462	0.204827	PIGS	http://amigo.geneontology.org/amigo/term/GO:0016255
stereocilia ankle link complex	Gene Ontology	GO:0002142	1	6	0.0817462	0.204827	USH1C	http://amigo.geneontology.org/amigo/term/GO:0002142
phosphate ion homeostasis	Gene Ontology	GO:0055062	1	6	0.0817462	0.204827	SFRP4	http://amigo.geneontology.org/amigo/term/GO:0055062
demethylase activity	Gene Ontology	GO:0032451	1	6	0.0817462	0.204827	MMACHC	http://amigo.geneontology.org/amigo/term/GO:0032451
Mo-molybdopterin cofactor biosynthetic process	Gene Ontology	GO:0006777	1	6	0.0817462	0.204827	MOCS2	http://amigo.geneontology.org/amigo/term/GO:0006777
regulation of protein localization to membrane	Gene Ontology	GO:1905475	1	6	0.0817462	0.204827	GPC4	http://amigo.geneontology.org/amigo/term/GO:1905475
AMP metabolic process	Gene Ontology	GO:0046033	1	6	0.0817462	0.204827	AMPD3	http://amigo.geneontology.org/amigo/term/GO:0046033
flavonoid glucuronidation	Gene Ontology	GO:0052696	1	6	0.0817462	0.204827	UGT1A10	http://amigo.geneontology.org/amigo/term/GO:0052696
3'-phosphoadenosine 5'-phosphosulfate biosynthetic process	Gene Ontology	GO:0050428	1	6	0.0817462	0.204827	PAPSS2	http://amigo.geneontology.org/amigo/term/GO:0050428
type B pancreatic cell differentiation	Gene Ontology	GO:0003309	1	6	0.0817462	0.204827	SCG2	http://amigo.geneontology.org/amigo/term/GO:0003309
response to mercury ion	Gene Ontology	GO:0046689	1	6	0.0817462	0.204827	SLC7A11	http://amigo.geneontology.org/amigo/term/GO:0046689
regulation of interleukin-1 beta production	Gene Ontology	GO:0032651	1	6	0.0817462	0.204827	SPHK1	http://amigo.geneontology.org/amigo/term/GO:0032651
L-glutamate import across plasma membrane	Gene Ontology	GO:0098712	1	6	0.0817462	0.204827	SLC7A11	http://amigo.geneontology.org/amigo/term/GO:0098712
positive regulation of protein kinase C activity	Gene Ontology	GO:1900020	1	6	0.0817462	0.204827	EGFR	http://amigo.geneontology.org/amigo/term/GO:1900020
germinal center B cell differentiation	Gene Ontology	GO:0002314	1	6	0.0817462	0.204827	CDH17	http://amigo.geneontology.org/amigo/term/GO:0002314
sphingomyelin biosynthetic process	Gene Ontology	GO:0006686	1	6	0.0817462	0.204827	MUC1	http://amigo.geneontology.org/amigo/term/GO:0006686
cell-cell adhesion mediated by integrin	Gene Ontology	GO:0033631	1	6	0.0817462	0.204827	NPNT	http://amigo.geneontology.org/amigo/term/GO:0033631
positive regulation of long-term synaptic depression	Gene Ontology	GO:1900454	1	6	0.0817462	0.204827	KCNB1	http://amigo.geneontology.org/amigo/term/GO:1900454
TORC2 signaling	Gene Ontology	GO:0038203	1	6	0.0817462	0.204827	PRR5L	http://amigo.geneontology.org/amigo/term/GO:0038203
phosphatidic acid transfer activity	Gene Ontology	GO:1990050	1	6	0.0817462	0.204827	PRELID3A	http://amigo.geneontology.org/amigo/term/GO:1990050
cytoplasmic sequestering of protein	Gene Ontology	GO:0051220	1	6	0.0817462	0.204827	FLNA	http://amigo.geneontology.org/amigo/term/GO:0051220
L-proline biosynthetic process	Gene Ontology	GO:0055129	1	6	0.0817462	0.204827	PYCR1	http://amigo.geneontology.org/amigo/term/GO:0055129
coreceptor activity involved in Wnt signaling pathway, planar cell polarity pathway	Gene Ontology	GO:1904929	1	6	0.0817462	0.204827	GPC4	http://amigo.geneontology.org/amigo/term/GO:1904929
endopeptidase activity	Gene Ontology	GO:0004175	3	81	0.0821504	0.205508	FURIN|MMP12|MMP9	http://amigo.geneontology.org/amigo/term/GO:0004175
cell morphogenesis	Gene Ontology	GO:0000902	3	81	0.0821504	0.205508	CDH11|MSX1|SHROOM1	http://amigo.geneontology.org/amigo/term/GO:0000902
cytokine activity	Gene Ontology	GO:0005125	5	186	0.0835434	0.208825	BMP7|LTB|WNT10B|SCG2|TNFSF15	http://amigo.geneontology.org/amigo/term/GO:0005125
calcium-mediated signaling	Gene Ontology	GO:0019722	3	82	0.0844271	0.209942	SPHK1|CCR6|CXCR4	http://amigo.geneontology.org/amigo/term/GO:0019722
ADP binding	Gene Ontology	GO:0043531	2	38	0.0844633	0.209942	MYO18A|PKM	http://amigo.geneontology.org/amigo/term/GO:0043531
negative regulation of Notch signaling pathway	Gene Ontology	GO:0045746	2	38	0.0844633	0.209942	BMP7|EGFR	http://amigo.geneontology.org/amigo/term/GO:0045746
protein O-linked glycosylation	Gene Ontology	GO:0006493	2	38	0.0844633	0.209942	GALNT7|GCNT3	http://amigo.geneontology.org/amigo/term/GO:0006493
dendritic shaft	Gene Ontology	GO:0043198	2	38	0.0844633	0.209942	FLNA|DLG3	http://amigo.geneontology.org/amigo/term/GO:0043198
microtubule cytoskeleton organization	Gene Ontology	GO:0000226	4	133	0.0856047	0.210457	TUBA1C|MAP7D2|TUBB3|DISC1	http://amigo.geneontology.org/amigo/term/GO:0000226
synaptic vesicle	Gene Ontology	GO:0008021	4	133	0.0856047	0.210457	STX1A|DISC1|SYNGR3|MTMR2	http://amigo.geneontology.org/amigo/term/GO:0008021
zinc ion binding	Gene Ontology	GO:0008270	15	820	0.0858069	0.210457	CA9|TRIM29|MMP12|TRIM16|RASSF1|RNF145|SOD1|MMP9|CHD3|QPCT|ADAMDEC1|TRIM59|ZNF93|S100A6|CRIP1	http://amigo.geneontology.org/amigo/term/GO:0008270
negative regulation of MAP kinase activity	Gene Ontology	GO:0043407	2	39	0.0881087	0.210457	BMP7|PRKCD	http://amigo.geneontology.org/amigo/term/GO:0043407
positive regulation of nitric oxide biosynthetic process	Gene Ontology	GO:0045429	2	39	0.0881087	0.210457	INSR|ASS1	http://amigo.geneontology.org/amigo/term/GO:0045429
negative regulation of signal transduction	Gene Ontology	GO:0009968	2	39	0.0881087	0.210457	PRR5L|UBASH3B	http://amigo.geneontology.org/amigo/term/GO:0009968
transporter activity	Gene Ontology	GO:0005215	2	39	0.0881087	0.210457	CPNE7|CDH17	http://amigo.geneontology.org/amigo/term/GO:0005215
positive regulation of GTPase activity	Gene Ontology	GO:0043547	7	307	0.0890055	0.210457	PREX2|CCL18|RIN1|ARHGAP8|RASAL1|SEMA4D|ARHGEF10L	http://amigo.geneontology.org/amigo/term/GO:0043547
BMP signaling pathway	Gene Ontology	GO:0030509	3	85	0.0914162	0.210457	BMP7|COMP|FST	http://amigo.geneontology.org/amigo/term/GO:0030509
locomotory behavior	Gene Ontology	GO:0007626	3	85	0.0914162	0.210457	CHRNA4|CDH23|SOD1	http://amigo.geneontology.org/amigo/term/GO:0007626
positive regulation of protein tyrosine kinase activity	Gene Ontology	GO:0061098	2	40	0.0918002	0.210457	LRP8|DLG3	http://amigo.geneontology.org/amigo/term/GO:0061098
motor activity	Gene Ontology	GO:0003774	2	40	0.0918002	0.210457	DYNC2H1|CGN	http://amigo.geneontology.org/amigo/term/GO:0003774
cilium movement	Gene Ontology	GO:0003341	2	40	0.0918002	0.210457	LRRC6|DNAAF4	http://amigo.geneontology.org/amigo/term/GO:0003341
activation of adenylate cyclase activity	Gene Ontology	GO:0007190	2	40	0.0918002	0.210457	ADRB2|ADCY3	http://amigo.geneontology.org/amigo/term/GO:0007190
positive regulation of protein import into nucleus	Gene Ontology	GO:0042307	2	40	0.0918002	0.210457	FLNA|PRKCD	http://amigo.geneontology.org/amigo/term/GO:0042307
heart trabecula morphogenesis	Gene Ontology	GO:0061384	1	7	0.0928666	0.210457	BMP7	http://amigo.geneontology.org/amigo/term/GO:0061384
collateral sprouting	Gene Ontology	GO:0048668	1	7	0.0928666	0.210457	EFNA5	http://amigo.geneontology.org/amigo/term/GO:0048668
tetrahydrofolate metabolic process	Gene Ontology	GO:0046653	1	7	0.0928666	0.210457	MTHFD2	http://amigo.geneontology.org/amigo/term/GO:0046653
SMAD protein complex	Gene Ontology	GO:0071141	1	7	0.0928666	0.210457	HMGA2	http://amigo.geneontology.org/amigo/term/GO:0071141
cellular response to hydroperoxide	Gene Ontology	GO:0071447	1	7	0.0928666	0.210457	PRKCD	http://amigo.geneontology.org/amigo/term/GO:0071447
neurofilament cytoskeleton organization	Gene Ontology	GO:0060052	1	7	0.0928666	0.210457	SOD1	http://amigo.geneontology.org/amigo/term/GO:0060052
phosphatidylinositol-3,5-bisphosphate 3-phosphatase activity	Gene Ontology	GO:0052629	1	7	0.0928666	0.210457	MTMR2	http://amigo.geneontology.org/amigo/term/GO:0052629
substrate-dependent cell migration	Gene Ontology	GO:0006929	1	7	0.0928666	0.210457	ITGA2	http://amigo.geneontology.org/amigo/term/GO:0006929
nucleoside transmembrane transporter activity	Gene Ontology	GO:0005337	1	7	0.0928666	0.210457	SLC29A2	http://amigo.geneontology.org/amigo/term/GO:0005337
succinate transmembrane transporter activity	Gene Ontology	GO:0015141	1	7	0.0928666	0.210457	SLC13A2	http://amigo.geneontology.org/amigo/term/GO:0015141
sphingosine-1-phosphate phosphatase activity	Gene Ontology	GO:0042392	1	7	0.0928666	0.210457	SGPP2	http://amigo.geneontology.org/amigo/term/GO:0042392
arachidonic acid monooxygenase activity	Gene Ontology	GO:0008391	1	7	0.0928666	0.210457	CYP4F11	http://amigo.geneontology.org/amigo/term/GO:0008391
nail development	Gene Ontology	GO:0035878	1	7	0.0928666	0.210457	ITGB4	http://amigo.geneontology.org/amigo/term/GO:0035878
relaxation of vascular associated smooth muscle	Gene Ontology	GO:0060087	1	7	0.0928666	0.210457	SOD1	http://amigo.geneontology.org/amigo/term/GO:0060087
positive regulation of small GTPase mediated signal transduction	Gene Ontology	GO:0051057	1	7	0.0928666	0.210457	SRC	http://amigo.geneontology.org/amigo/term/GO:0051057
condensin complex	Gene Ontology	GO:0000796	1	7	0.0928666	0.210457	CAPG	http://amigo.geneontology.org/amigo/term/GO:0000796
L-serine transport	Gene Ontology	GO:0015825	1	7	0.0928666	0.210457	SLC1A5	http://amigo.geneontology.org/amigo/term/GO:0015825
chorio-allantoic fusion	Gene Ontology	GO:0060710	1	7	0.0928666	0.210457	BMP7	http://amigo.geneontology.org/amigo/term/GO:0060710
aryl sulfotransferase activity	Gene Ontology	GO:0004062	1	7	0.0928666	0.210457	SULT1A1	http://amigo.geneontology.org/amigo/term/GO:0004062
lung epithelium development	Gene Ontology	GO:0060428	1	7	0.0928666	0.210457	FOXJ1	http://amigo.geneontology.org/amigo/term/GO:0060428
catecholamine metabolic process	Gene Ontology	GO:0006584	1	7	0.0928666	0.210457	SULT1A1	http://amigo.geneontology.org/amigo/term/GO:0006584
dehydroascorbic acid transport	Gene Ontology	GO:0070837	1	7	0.0928666	0.210457	SLC2A1	http://amigo.geneontology.org/amigo/term/GO:0070837
transition between fast and slow fiber	Gene Ontology	GO:0014883	1	7	0.0928666	0.210457	TNNT1	http://amigo.geneontology.org/amigo/term/GO:0014883
vascular endothelial growth factor production	Gene Ontology	GO:0010573	1	7	0.0928666	0.210457	ADGRG1	http://amigo.geneontology.org/amigo/term/GO:0010573
fusion of virus membrane with host plasma membrane	Gene Ontology	GO:0019064	1	7	0.0928666	0.210457	CXCR4	http://amigo.geneontology.org/amigo/term/GO:0019064
positive regulation of dendritic cell antigen processing and presentation	Gene Ontology	GO:0002606	1	7	0.0928666	0.210457	SLC11A1	http://amigo.geneontology.org/amigo/term/GO:0002606
GPI anchor binding	Gene Ontology	GO:0034235	1	7	0.0928666	0.210457	CEACAM5	http://amigo.geneontology.org/amigo/term/GO:0034235
negative regulation of interleukin-4 production	Gene Ontology	GO:0032713	1	7	0.0928666	0.210457	CD83	http://amigo.geneontology.org/amigo/term/GO:0032713
positive regulation of inhibitory postsynaptic potential	Gene Ontology	GO:0097151	1	7	0.0928666	0.210457	IGSF9B	http://amigo.geneontology.org/amigo/term/GO:0097151
negative regulation of double-strand break repair via nonhomologous end joining	Gene Ontology	GO:2001033	1	7	0.0928666	0.210457	HMGA2	http://amigo.geneontology.org/amigo/term/GO:2001033
L-serine transmembrane transporter activity	Gene Ontology	GO:0015194	1	7	0.0928666	0.210457	SLC1A5	http://amigo.geneontology.org/amigo/term/GO:0015194
regulation of microvillus length	Gene Ontology	GO:0032532	1	7	0.0928666	0.210457	USH1C	http://amigo.geneontology.org/amigo/term/GO:0032532
protein localization to endoplasmic reticulum exit site	Gene Ontology	GO:0070973	1	7	0.0928666	0.210457	SEC16B	http://amigo.geneontology.org/amigo/term/GO:0070973
LIM domain binding	Gene Ontology	GO:0030274	1	7	0.0928666	0.210457	RIPK2	http://amigo.geneontology.org/amigo/term/GO:0030274
positive regulation of histone H3-K9 methylation	Gene Ontology	GO:0051574	1	7	0.0928666	0.210457	MYB	http://amigo.geneontology.org/amigo/term/GO:0051574
left/right pattern formation	Gene Ontology	GO:0060972	1	7	0.0928666	0.210457	FOXJ1	http://amigo.geneontology.org/amigo/term/GO:0060972
positive regulation of potassium ion import across plasma membrane	Gene Ontology	GO:1903288	1	7	0.0928666	0.210457	ATP1B3	http://amigo.geneontology.org/amigo/term/GO:1903288
regulation of cytokine biosynthetic process	Gene Ontology	GO:0042035	1	7	0.0928666	0.210457	IGF2BP3	http://amigo.geneontology.org/amigo/term/GO:0042035
protein phosphatase 2B binding	Gene Ontology	GO:0030346	1	7	0.0928666	0.210457	SOD1	http://amigo.geneontology.org/amigo/term/GO:0030346
glucose catabolic process	Gene Ontology	GO:0006007	1	7	0.0928666	0.210457	PFKP	http://amigo.geneontology.org/amigo/term/GO:0006007
positive regulation of non-membrane spanning protein tyrosine kinase activity	Gene Ontology	GO:1903997	1	7	0.0928666	0.210457	SRC	http://amigo.geneontology.org/amigo/term/GO:1903997
positive regulation of hair follicle development	Gene Ontology	GO:0051798	1	7	0.0928666	0.210457	FST	http://amigo.geneontology.org/amigo/term/GO:0051798
angiotensin-activated signaling pathway	Gene Ontology	GO:0038166	1	7	0.0928666	0.210457	AGTRAP	http://amigo.geneontology.org/amigo/term/GO:0038166
galactose catabolic process	Gene Ontology	GO:0019388	1	7	0.0928666	0.210457	GALK1	http://amigo.geneontology.org/amigo/term/GO:0019388
dehydroascorbic acid transmembrane transporter activity	Gene Ontology	GO:0033300	1	7	0.0928666	0.210457	SLC2A1	http://amigo.geneontology.org/amigo/term/GO:0033300
regulation of cilium beat frequency involved in ciliary motility	Gene Ontology	GO:0060296	1	7	0.0928666	0.210457	CATSPER1	http://amigo.geneontology.org/amigo/term/GO:0060296
negative regulation of monocyte differentiation	Gene Ontology	GO:0045656	1	7	0.0928666	0.210457	MYC	http://amigo.geneontology.org/amigo/term/GO:0045656
Cdc42 protein signal transduction	Gene Ontology	GO:0032488	1	7	0.0928666	0.210457	RHOV	http://amigo.geneontology.org/amigo/term/GO:0032488
syndecan binding	Gene Ontology	GO:0045545	1	7	0.0928666	0.210457	GPNMB	http://amigo.geneontology.org/amigo/term/GO:0045545
cuprous ion binding	Gene Ontology	GO:1903136	1	7	0.0928666	0.210457	SNCG	http://amigo.geneontology.org/amigo/term/GO:1903136
adrenergic receptor signaling pathway	Gene Ontology	GO:0071875	1	7	0.0928666	0.210457	ADRB2	http://amigo.geneontology.org/amigo/term/GO:0071875
delta-catenin binding	Gene Ontology	GO:0070097	1	7	0.0928666	0.210457	PTPRT	http://amigo.geneontology.org/amigo/term/GO:0070097
heme catabolic process	Gene Ontology	GO:0042167	1	7	0.0928666	0.210457	UGT1A10	http://amigo.geneontology.org/amigo/term/GO:0042167
negative regulation of glial cell apoptotic process	Gene Ontology	GO:0034351	1	7	0.0928666	0.210457	PRKCD	http://amigo.geneontology.org/amigo/term/GO:0034351
positive regulation of transcription from RNA polymerase II promoter in response to stress	Gene Ontology	GO:0036003	1	7	0.0928666	0.210457	MUC1	http://amigo.geneontology.org/amigo/term/GO:0036003
parathyroid gland development	Gene Ontology	GO:0060017	1	7	0.0928666	0.210457	HOXA3	http://amigo.geneontology.org/amigo/term/GO:0060017
negative regulation of stress-activated MAPK cascade	Gene Ontology	GO:0032873	1	7	0.0928666	0.210457	MYC	http://amigo.geneontology.org/amigo/term/GO:0032873
positive regulation of sensory perception of pain	Gene Ontology	GO:1904058	1	7	0.0928666	0.210457	PTAFR	http://amigo.geneontology.org/amigo/term/GO:1904058
endothelial tube morphogenesis	Gene Ontology	GO:0061154	1	7	0.0928666	0.210457	CXCR4	http://amigo.geneontology.org/amigo/term/GO:0061154
lymph vessel development	Gene Ontology	GO:0001945	1	7	0.0928666	0.210457	EFNB2	http://amigo.geneontology.org/amigo/term/GO:0001945
cell-substrate junction	Gene Ontology	GO:0030055	1	7	0.0928666	0.210457	FERMT1	http://amigo.geneontology.org/amigo/term/GO:0030055
pericardium morphogenesis	Gene Ontology	GO:0003344	1	7	0.0928666	0.210457	BMP7	http://amigo.geneontology.org/amigo/term/GO:0003344
positive regulation of metallopeptidase activity	Gene Ontology	GO:1905050	1	7	0.0928666	0.210457	CLDN4	http://amigo.geneontology.org/amigo/term/GO:1905050
zinc ion import across plasma membrane	Gene Ontology	GO:0071578	1	7	0.0928666	0.210457	SLC39A4	http://amigo.geneontology.org/amigo/term/GO:0071578
laminin complex	Gene Ontology	GO:0043256	1	7	0.0928666	0.210457	LAMB1	http://amigo.geneontology.org/amigo/term/GO:0043256
cellular hypotonic response	Gene Ontology	GO:0071476	1	7	0.0928666	0.210457	STK39	http://amigo.geneontology.org/amigo/term/GO:0071476
interleukin-1 binding	Gene Ontology	GO:0019966	1	7	0.0928666	0.210457	TRIM16	http://amigo.geneontology.org/amigo/term/GO:0019966
protein binding involved in heterotypic cell-cell adhesion	Gene Ontology	GO:0086080	1	7	0.0928666	0.210457	NRCAM	http://amigo.geneontology.org/amigo/term/GO:0086080
positive regulation of integrin activation	Gene Ontology	GO:0033625	1	7	0.0928666	0.210457	SRC	http://amigo.geneontology.org/amigo/term/GO:0033625
cellular response to laminar fluid shear stress	Gene Ontology	GO:0071499	1	7	0.0928666	0.210457	ASS1	http://amigo.geneontology.org/amigo/term/GO:0071499
nitrogen compound metabolic process	Gene Ontology	GO:0006807	1	7	0.0928666	0.210457	NIT1	http://amigo.geneontology.org/amigo/term/GO:0006807
methionine metabolic process	Gene Ontology	GO:0006555	1	7	0.0928666	0.210457	GNMT	http://amigo.geneontology.org/amigo/term/GO:0006555
positive regulation of autophagosome maturation	Gene Ontology	GO:1901098	1	7	0.0928666	0.210457	ADRB2	http://amigo.geneontology.org/amigo/term/GO:1901098
maternal process involved in parturition	Gene Ontology	GO:0060137	1	7	0.0928666	0.210457	ARNTL	http://amigo.geneontology.org/amigo/term/GO:0060137
nucleoside transmembrane transport	Gene Ontology	GO:1901642	1	7	0.0928666	0.210457	SLC29A2	http://amigo.geneontology.org/amigo/term/GO:1901642
positive regulation of lamellipodium morphogenesis	Gene Ontology	GO:2000394	1	7	0.0928666	0.210457	SRC	http://amigo.geneontology.org/amigo/term/GO:2000394
negative regulation of cytoplasmic translation	Gene Ontology	GO:2000766	1	7	0.0928666	0.210457	CPEB3	http://amigo.geneontology.org/amigo/term/GO:2000766
organelle fission	Gene Ontology	GO:0048285	1	7	0.0928666	0.210457	MX2	http://amigo.geneontology.org/amigo/term/GO:0048285
positive regulation of respiratory burst	Gene Ontology	GO:0060267	1	7	0.0928666	0.210457	INSR	http://amigo.geneontology.org/amigo/term/GO:0060267
reelin-mediated signaling pathway	Gene Ontology	GO:0038026	1	7	0.0928666	0.210457	LRP8	http://amigo.geneontology.org/amigo/term/GO:0038026
negative regulation of mitochondrial depolarization	Gene Ontology	GO:0051902	1	7	0.0928666	0.210457	SRC	http://amigo.geneontology.org/amigo/term/GO:0051902
vascular endothelial growth factor-activated receptor activity	Gene Ontology	GO:0005021	1	7	0.0928666	0.210457	NELL2	http://amigo.geneontology.org/amigo/term/GO:0005021
cerebral cortex regionalization	Gene Ontology	GO:0021796	1	7	0.0928666	0.210457	ADGRG1	http://amigo.geneontology.org/amigo/term/GO:0021796
cellular triglyceride homeostasis	Gene Ontology	GO:0035356	1	7	0.0928666	0.210457	XBP1	http://amigo.geneontology.org/amigo/term/GO:0035356
synaptic vesicle budding from presynaptic endocytic zone membrane	Gene Ontology	GO:0016185	1	7	0.0928666	0.210457	MX2	http://amigo.geneontology.org/amigo/term/GO:0016185
magnesium ion homeostasis	Gene Ontology	GO:0010960	1	7	0.0928666	0.210457	EGFR	http://amigo.geneontology.org/amigo/term/GO:0010960
protein localization to ciliary transition zone	Gene Ontology	GO:1904491	1	7	0.0928666	0.210457	MAPK15	http://amigo.geneontology.org/amigo/term/GO:1904491
regulation of cell death	Gene Ontology	GO:0010941	1	7	0.0928666	0.210457	HSPA1A	http://amigo.geneontology.org/amigo/term/GO:0010941
thyroid hormone binding	Gene Ontology	GO:0070324	1	7	0.0928666	0.210457	PKM	http://amigo.geneontology.org/amigo/term/GO:0070324
clustering of voltage-gated sodium channels	Gene Ontology	GO:0045162	1	7	0.0928666	0.210457	NRCAM	http://amigo.geneontology.org/amigo/term/GO:0045162
phospholipase D activity	Gene Ontology	GO:0004630	1	7	0.0928666	0.210457	FAM83B	http://amigo.geneontology.org/amigo/term/GO:0004630
salivary gland morphogenesis	Gene Ontology	GO:0007435	1	7	0.0928666	0.210457	EGFR	http://amigo.geneontology.org/amigo/term/GO:0007435
vascular associated smooth muscle cell development	Gene Ontology	GO:0097084	1	7	0.0928666	0.210457	COMP	http://amigo.geneontology.org/amigo/term/GO:0097084
positive regulation of immunoglobulin production	Gene Ontology	GO:0002639	1	7	0.0928666	0.210457	XBP1	http://amigo.geneontology.org/amigo/term/GO:0002639
positive regulation of integrin-mediated signaling pathway	Gene Ontology	GO:2001046	1	7	0.0928666	0.210457	FLNA	http://amigo.geneontology.org/amigo/term/GO:2001046
myosin light chain binding	Gene Ontology	GO:0032027	1	7	0.0928666	0.210457	CXCR4	http://amigo.geneontology.org/amigo/term/GO:0032027
p38MAPK cascade	Gene Ontology	GO:0038066	1	7	0.0928666	0.210457	LGALS9	http://amigo.geneontology.org/amigo/term/GO:0038066
secretion	Gene Ontology	GO:0046903	1	7	0.0928666	0.210457	CA9	http://amigo.geneontology.org/amigo/term/GO:0046903
cell body fiber	Gene Ontology	GO:0070852	1	7	0.0928666	0.210457	ASS1	http://amigo.geneontology.org/amigo/term/GO:0070852
transmembrane receptor protein tyrosine kinase activator activity	Gene Ontology	GO:0030297	1	7	0.0928666	0.210457	EFNA5	http://amigo.geneontology.org/amigo/term/GO:0030297
negative regulation of inflammatory response to antigenic stimulus	Gene Ontology	GO:0002862	1	7	0.0928666	0.210457	GPR17	http://amigo.geneontology.org/amigo/term/GO:0002862
trigeminal nerve development	Gene Ontology	GO:0021559	1	7	0.0928666	0.210457	TIFAB	http://amigo.geneontology.org/amigo/term/GO:0021559
polysome binding	Gene Ontology	GO:1905538	1	7	0.0928666	0.210457	YBX3	http://amigo.geneontology.org/amigo/term/GO:1905538
succinate transmembrane transport	Gene Ontology	GO:0071422	1	7	0.0928666	0.210457	SLC13A2	http://amigo.geneontology.org/amigo/term/GO:0071422
microtubule binding	Gene Ontology	GO:0008017	6	252	0.0950073	0.214995	RCC2|HDGFL3|MX2|CLIP2|GLI1|FES	http://amigo.geneontology.org/amigo/term/GO:0008017
bicarbonate transport	Gene Ontology	GO:0015701	2	41	0.095536	0.21525	SLC26A9|CA9	http://amigo.geneontology.org/amigo/term/GO:0015701
transferase activity	Gene Ontology	GO:0016740	2	41	0.095536	0.21525	MMACHC|TRIM16	http://amigo.geneontology.org/amigo/term/GO:0016740
SH2 domain binding	Gene Ontology	GO:0042169	2	41	0.095536	0.21525	SRC|SYNGR3	http://amigo.geneontology.org/amigo/term/GO:0042169
response to nutrient levels	Gene Ontology	GO:0031667	2	41	0.095536	0.21525	SRC|SOD1	http://amigo.geneontology.org/amigo/term/GO:0031667
response to starvation	Gene Ontology	GO:0042594	2	41	0.095536	0.21525	AACS|UGT1A10	http://amigo.geneontology.org/amigo/term/GO:0042594
response to cAMP	Gene Ontology	GO:0051591	2	41	0.095536	0.21525	VGF|SLC7A11	http://amigo.geneontology.org/amigo/term/GO:0051591
actin filament	Gene Ontology	GO:0005884	3	87	0.0962049	0.216287	FLNA|SRC|MISP	http://amigo.geneontology.org/amigo/term/GO:0005884
transcription, DNA-templated	Gene Ontology	GO:0006351	3	87	0.0962049	0.216287	MLF1|ASXL3|HOXB9	http://amigo.geneontology.org/amigo/term/GO:0006351
recycling endosome membrane	Gene Ontology	GO:0055038	3	87	0.0962049	0.216287	PDLIM4|SLC39A4|FZD7	http://amigo.geneontology.org/amigo/term/GO:0055038
transmembrane transporter activity	Gene Ontology	GO:0022857	3	88	0.0986369	0.216412	ABCB9|SLC2A12|SLC35F2	http://amigo.geneontology.org/amigo/term/GO:0022857
estrogen receptor binding	Gene Ontology	GO:0030331	2	42	0.0993147	0.216412	SRC|DNAAF4	http://amigo.geneontology.org/amigo/term/GO:0030331
positive regulation of insulin secretion	Gene Ontology	GO:0032024	2	42	0.0993147	0.216412	AACS|NR0B2	http://amigo.geneontology.org/amigo/term/GO:0032024
fatty acid biosynthetic process	Gene Ontology	GO:0006633	2	42	0.0993147	0.216412	FA2H|XBP1	http://amigo.geneontology.org/amigo/term/GO:0006633
clathrin binding	Gene Ontology	GO:0030276	2	42	0.0993147	0.216412	SYT8|CACNA1I	http://amigo.geneontology.org/amigo/term/GO:0030276
response to progesterone	Gene Ontology	GO:0032570	2	42	0.0993147	0.216412	CLDN4|CATSPER1	http://amigo.geneontology.org/amigo/term/GO:0032570
mRNA transport	Gene Ontology	GO:0051028	2	42	0.0993147	0.216412	IGF2BP3|MX2	http://amigo.geneontology.org/amigo/term/GO:0051028
negative regulation of cell cycle	Gene Ontology	GO:0045786	2	42	0.0993147	0.216412	BMP7|SCG2	http://amigo.geneontology.org/amigo/term/GO:0045786
centrosome	Gene Ontology	GO:0005813	10	506	0.0993507	0.216412	CHD3|ITGB6|SPATC1L|ARL2|CEP126|DISC1|HSPA1A|SNCG|DNAAF4|ADGRB2	http://amigo.geneontology.org/amigo/term/GO:0005813
Wnt signaling pathway, planar cell polarity pathway	Gene Ontology	GO:0060071	3	89	0.101094	0.216412	GPC4|CTHRC1|FZD7	http://amigo.geneontology.org/amigo/term/GO:0060071
wound healing	Gene Ontology	GO:0042060	3	89	0.101094	0.216412	EVPL|EGFR|SLC11A1	http://amigo.geneontology.org/amigo/term/GO:0042060
kinesin binding	Gene Ontology	GO:0019894	2	43	0.103134	0.216412	DISC1|LRP8	http://amigo.geneontology.org/amigo/term/GO:0019894
intrinsic apoptotic signaling pathway in response to DNA damage	Gene Ontology	GO:0008630	2	43	0.103134	0.216412	NFATC4|CRIP1	http://amigo.geneontology.org/amigo/term/GO:0008630
monocyte chemotaxis	Gene Ontology	GO:0002548	2	43	0.103134	0.216412	CCL18|TNFRSF11A	http://amigo.geneontology.org/amigo/term/GO:0002548
protein targeting	Gene Ontology	GO:0006605	2	43	0.103134	0.216412	AP1M2|YWHAZ	http://amigo.geneontology.org/amigo/term/GO:0006605
intermembrane lipid transfer	Gene Ontology	GO:0120009	2	43	0.103134	0.216412	GRAMD1B|PRELID3A	http://amigo.geneontology.org/amigo/term/GO:0120009
eye development	Gene Ontology	GO:0001654	2	43	0.103134	0.216412	ADAMTS18|PBX4	http://amigo.geneontology.org/amigo/term/GO:0001654
positive chemotaxis	Gene Ontology	GO:0050918	2	43	0.103134	0.216412	SCG2|GPNMB	http://amigo.geneontology.org/amigo/term/GO:0050918
positive regulation of peptidyl-serine phosphorylation	Gene Ontology	GO:0033138	3	90	0.103575	0.216412	RIPK2|EGFR|SH2D3A	http://amigo.geneontology.org/amigo/term/GO:0033138
myelin assembly	Gene Ontology	GO:0032288	1	8	0.103853	0.216412	MTMR2	http://amigo.geneontology.org/amigo/term/GO:0032288
condensed chromosome, centromeric region	Gene Ontology	GO:0000779	1	8	0.103853	0.216412	CAPG	http://amigo.geneontology.org/amigo/term/GO:0000779
T cell migration	Gene Ontology	GO:0072678	1	8	0.103853	0.216412	CCR6	http://amigo.geneontology.org/amigo/term/GO:0072678
ion transmembrane transporter activity	Gene Ontology	GO:0015075	1	8	0.103853	0.216412	S100A6	http://amigo.geneontology.org/amigo/term/GO:0015075
cerebral cortex cell migration	Gene Ontology	GO:0021795	1	8	0.103853	0.216412	EGFR	http://amigo.geneontology.org/amigo/term/GO:0021795
regulation of cardiac muscle contraction by calcium ion signaling	Gene Ontology	GO:0010882	1	8	0.103853	0.216412	TNNI3	http://amigo.geneontology.org/amigo/term/GO:0010882
GDP metabolic process	Gene Ontology	GO:0046710	1	8	0.103853	0.216412	CARD11	http://amigo.geneontology.org/amigo/term/GO:0046710
regulation of defense response to virus by host	Gene Ontology	GO:0050691	1	8	0.103853	0.216412	MMP12	http://amigo.geneontology.org/amigo/term/GO:0050691
extrinsic component of external side of plasma membrane	Gene Ontology	GO:0031232	1	8	0.103853	0.216412	SERPINE2	http://amigo.geneontology.org/amigo/term/GO:0031232
insulin-like growth factor II binding	Gene Ontology	GO:0031995	1	8	0.103853	0.216412	INSR	http://amigo.geneontology.org/amigo/term/GO:0031995
neuronal dense core vesicle	Gene Ontology	GO:0098992	1	8	0.103853	0.216412	SCG2	http://amigo.geneontology.org/amigo/term/GO:0098992
negative regulation of activin receptor signaling pathway	Gene Ontology	GO:0032926	1	8	0.103853	0.216412	FST	http://amigo.geneontology.org/amigo/term/GO:0032926
signal complex assembly	Gene Ontology	GO:0007172	1	8	0.103853	0.216412	SRC	http://amigo.geneontology.org/amigo/term/GO:0007172
ceramide transport	Gene Ontology	GO:0035627	1	8	0.103853	0.216412	ABCA12	http://amigo.geneontology.org/amigo/term/GO:0035627
positive regulation of AMPA receptor activity	Gene Ontology	GO:2000969	1	8	0.103853	0.216412	ADRB2	http://amigo.geneontology.org/amigo/term/GO:2000969
glutamine transport	Gene Ontology	GO:0006868	1	8	0.103853	0.216412	SLC1A5	http://amigo.geneontology.org/amigo/term/GO:0006868
regulation of cytokine-mediated signaling pathway	Gene Ontology	GO:0001959	1	8	0.103853	0.216412	RUNX1	http://amigo.geneontology.org/amigo/term/GO:0001959
bone trabecula formation	Gene Ontology	GO:0060346	1	8	0.103853	0.216412	WNT10B	http://amigo.geneontology.org/amigo/term/GO:0060346
negative regulation of potassium ion transmembrane transporter activity	Gene Ontology	GO:1901017	1	8	0.103853	0.216412	STK39	http://amigo.geneontology.org/amigo/term/GO:1901017
postsynaptic neurotransmitter receptor internalization	Gene Ontology	GO:0098884	1	8	0.103853	0.216412	MX2	http://amigo.geneontology.org/amigo/term/GO:0098884
hydrolase activity, acting on carbon-nitrogen (but not peptide) bonds, in linear amides	Gene Ontology	GO:0016811	1	8	0.103853	0.216412	NIT1	http://amigo.geneontology.org/amigo/term/GO:0016811
chitin binding	Gene Ontology	GO:0008061	1	8	0.103853	0.216412	CHIT1	http://amigo.geneontology.org/amigo/term/GO:0008061
nephron development	Gene Ontology	GO:0072006	1	8	0.103853	0.216412	ITGA3	http://amigo.geneontology.org/amigo/term/GO:0072006
ion channel regulator activity	Gene Ontology	GO:0099106	1	8	0.103853	0.216412	FXYD3	http://amigo.geneontology.org/amigo/term/GO:0099106
sphingosine-1-phosphate receptor activity	Gene Ontology	GO:0038036	1	8	0.103853	0.216412	SPHK1	http://amigo.geneontology.org/amigo/term/GO:0038036
euchromatin	Gene Ontology	GO:0000791	1	8	0.103853	0.216412	CBX2	http://amigo.geneontology.org/amigo/term/GO:0000791
nucleoside triphosphate biosynthetic process	Gene Ontology	GO:0009142	1	8	0.103853	0.216412	AK8	http://amigo.geneontology.org/amigo/term/GO:0009142
TORC1 signaling	Gene Ontology	GO:0038202	1	8	0.103853	0.216412	CARD11	http://amigo.geneontology.org/amigo/term/GO:0038202
store-operated calcium entry	Gene Ontology	GO:0002115	1	8	0.103853	0.216412	ORAI2	http://amigo.geneontology.org/amigo/term/GO:0002115
dorsal spinal cord development	Gene Ontology	GO:0021516	1	8	0.103853	0.216412	HOXB8	http://amigo.geneontology.org/amigo/term/GO:0021516
myotube differentiation	Gene Ontology	GO:0014902	1	8	0.103853	0.216412	MYEF2	http://amigo.geneontology.org/amigo/term/GO:0014902
entry of bacterium into host cell	Gene Ontology	GO:0035635	1	8	0.103853	0.216412	SRC	http://amigo.geneontology.org/amigo/term/GO:0035635
positive regulation of fibroblast apoptotic process	Gene Ontology	GO:2000271	1	8	0.103853	0.216412	STK17B	http://amigo.geneontology.org/amigo/term/GO:2000271
MHC class I peptide loading complex	Gene Ontology	GO:0042824	1	8	0.103853	0.216412	ABCB9	http://amigo.geneontology.org/amigo/term/GO:0042824
alpha-(1->3)-fucosyltransferase activity	Gene Ontology	GO:0046920	1	8	0.103853	0.216412	FUT4	http://amigo.geneontology.org/amigo/term/GO:0046920
galactoside binding	Gene Ontology	GO:0016936	1	8	0.103853	0.216412	LGALS9	http://amigo.geneontology.org/amigo/term/GO:0016936
calcium-independent phospholipase A2 activity	Gene Ontology	GO:0047499	1	8	0.103853	0.216412	PRDX6	http://amigo.geneontology.org/amigo/term/GO:0047499
positive regulation of early endosome to late endosome transport	Gene Ontology	GO:2000643	1	8	0.103853	0.216412	MTMR2	http://amigo.geneontology.org/amigo/term/GO:2000643
intracellular vesicle	Gene Ontology	GO:0097708	1	8	0.103853	0.216412	AP3B2	http://amigo.geneontology.org/amigo/term/GO:0097708
iron ion transmembrane transport	Gene Ontology	GO:0034755	1	8	0.103853	0.216412	SLC11A1	http://amigo.geneontology.org/amigo/term/GO:0034755
ovulation cycle	Gene Ontology	GO:0042698	1	8	0.103853	0.216412	EGFR	http://amigo.geneontology.org/amigo/term/GO:0042698
cellular response to antibiotic	Gene Ontology	GO:0071236	1	8	0.103853	0.216412	CRIP1	http://amigo.geneontology.org/amigo/term/GO:0071236
lens fiber cell development	Gene Ontology	GO:0070307	1	8	0.103853	0.216412	VIM	http://amigo.geneontology.org/amigo/term/GO:0070307
killing by host of symbiont cells	Gene Ontology	GO:0051873	1	8	0.103853	0.216412	MBL2	http://amigo.geneontology.org/amigo/term/GO:0051873
endosomal vesicle fusion	Gene Ontology	GO:0034058	1	8	0.103853	0.216412	SAMD9	http://amigo.geneontology.org/amigo/term/GO:0034058
ion homeostasis	Gene Ontology	GO:0050801	1	8	0.103853	0.216412	STK39	http://amigo.geneontology.org/amigo/term/GO:0050801
interleukin-21-mediated signaling pathway	Gene Ontology	GO:0038114	1	8	0.103853	0.216412	IL2RG	http://amigo.geneontology.org/amigo/term/GO:0038114
positive regulation of inositol phosphate biosynthetic process	Gene Ontology	GO:0060732	1	8	0.103853	0.216412	PTAFR	http://amigo.geneontology.org/amigo/term/GO:0060732
adenylate kinase activity	Gene Ontology	GO:0004017	1	8	0.103853	0.216412	AK8	http://amigo.geneontology.org/amigo/term/GO:0004017
malate metabolic process	Gene Ontology	GO:0006108	1	8	0.103853	0.216412	FH	http://amigo.geneontology.org/amigo/term/GO:0006108
epinephrine binding	Gene Ontology	GO:0051379	1	8	0.103853	0.216412	ADRB2	http://amigo.geneontology.org/amigo/term/GO:0051379
chemokine receptor binding	Gene Ontology	GO:0042379	1	8	0.103853	0.216412	S100A14	http://amigo.geneontology.org/amigo/term/GO:0042379
mammary gland epithelium development	Gene Ontology	GO:0061180	1	8	0.103853	0.216412	MSX1	http://amigo.geneontology.org/amigo/term/GO:0061180
vesicle targeting	Gene Ontology	GO:0006903	1	8	0.103853	0.216412	AP1M2	http://amigo.geneontology.org/amigo/term/GO:0006903
olfactory behavior	Gene Ontology	GO:0042048	1	8	0.103853	0.216412	GJB4	http://amigo.geneontology.org/amigo/term/GO:0042048
regulation of endothelial cell migration	Gene Ontology	GO:0010594	1	8	0.103853	0.216412	SEMA4A	http://amigo.geneontology.org/amigo/term/GO:0010594
establishment of integrated proviral latency	Gene Ontology	GO:0075713	1	8	0.103853	0.216412	HMGA1	http://amigo.geneontology.org/amigo/term/GO:0075713
homotypic cell-cell adhesion	Gene Ontology	GO:0034109	1	8	0.103853	0.216412	CEACAM5	http://amigo.geneontology.org/amigo/term/GO:0034109
galactose metabolic process	Gene Ontology	GO:0006012	1	8	0.103853	0.216412	GALK1	http://amigo.geneontology.org/amigo/term/GO:0006012
positive regulation by host of viral process	Gene Ontology	GO:0044794	1	8	0.103853	0.216412	CFL1	http://amigo.geneontology.org/amigo/term/GO:0044794
cAMP-dependent protein kinase inhibitor activity	Gene Ontology	GO:0004862	1	8	0.103853	0.216412	PKIA	http://amigo.geneontology.org/amigo/term/GO:0004862
positive regulation of ion transmembrane transporter activity	Gene Ontology	GO:0032414	1	8	0.103853	0.216412	STK39	http://amigo.geneontology.org/amigo/term/GO:0032414
UDP-xylosyltransferase activity	Gene Ontology	GO:0035252	1	8	0.103853	0.216412	GXYLT2	http://amigo.geneontology.org/amigo/term/GO:0035252
hydrogen peroxide biosynthetic process	Gene Ontology	GO:0050665	1	8	0.103853	0.216412	SOD1	http://amigo.geneontology.org/amigo/term/GO:0050665
nucleoside-triphosphatase activity	Gene Ontology	GO:0017111	1	8	0.103853	0.216412	ENTPD2	http://amigo.geneontology.org/amigo/term/GO:0017111
amine metabolic process	Gene Ontology	GO:0009308	1	8	0.103853	0.216412	SULT1A1	http://amigo.geneontology.org/amigo/term/GO:0009308
cellular response to UV-B	Gene Ontology	GO:0071493	1	8	0.103853	0.216412	CRIP1	http://amigo.geneontology.org/amigo/term/GO:0071493
regulation of early endosome to late endosome transport	Gene Ontology	GO:2000641	1	8	0.103853	0.216412	SRC	http://amigo.geneontology.org/amigo/term/GO:2000641
xenobiotic glucuronidation	Gene Ontology	GO:0052697	1	8	0.103853	0.216412	UGT1A10	http://amigo.geneontology.org/amigo/term/GO:0052697
positive regulation of necrotic cell death	Gene Ontology	GO:0010940	1	8	0.103853	0.216412	SLC6A6	http://amigo.geneontology.org/amigo/term/GO:0010940
positive regulation of circadian rhythm	Gene Ontology	GO:0042753	1	8	0.103853	0.216412	ARNTL	http://amigo.geneontology.org/amigo/term/GO:0042753
L-glutamine transmembrane transporter activity	Gene Ontology	GO:0015186	1	8	0.103853	0.216412	SLC1A5	http://amigo.geneontology.org/amigo/term/GO:0015186
hemidesmosome	Gene Ontology	GO:0030056	1	8	0.103853	0.216412	ITGB4	http://amigo.geneontology.org/amigo/term/GO:0030056
Bergmann glial cell differentiation	Gene Ontology	GO:0060020	1	8	0.103853	0.216412	VIM	http://amigo.geneontology.org/amigo/term/GO:0060020
regulation of organ growth	Gene Ontology	GO:0046620	1	8	0.103853	0.216412	SOD1	http://amigo.geneontology.org/amigo/term/GO:0046620
establishment of Golgi localization	Gene Ontology	GO:0051683	1	8	0.103853	0.216412	YWHAZ	http://amigo.geneontology.org/amigo/term/GO:0051683
regulation of keratinocyte proliferation	Gene Ontology	GO:0010837	1	8	0.103853	0.216412	OVOL2	http://amigo.geneontology.org/amigo/term/GO:0010837
clathrin-sculpted gamma-aminobutyric acid transport vesicle membrane	Gene Ontology	GO:0061202	1	8	0.103853	0.216412	GAD1	http://amigo.geneontology.org/amigo/term/GO:0061202
heterochromatin organization	Gene Ontology	GO:0070828	1	8	0.103853	0.216412	MECOM	http://amigo.geneontology.org/amigo/term/GO:0070828
dynamin family protein polymerization involved in mitochondrial fission	Gene Ontology	GO:0003374	1	8	0.103853	0.216412	MX2	http://amigo.geneontology.org/amigo/term/GO:0003374
regulation of endopeptidase activity	Gene Ontology	GO:0052548	1	8	0.103853	0.216412	FURIN	http://amigo.geneontology.org/amigo/term/GO:0052548
epithelial structure maintenance	Gene Ontology	GO:0010669	1	8	0.103853	0.216412	PIWIL4	http://amigo.geneontology.org/amigo/term/GO:0010669
positive regulation of epidermal cell differentiation	Gene Ontology	GO:0045606	1	8	0.103853	0.216412	SFRP4	http://amigo.geneontology.org/amigo/term/GO:0045606
ATP-dependent protein binding	Gene Ontology	GO:0043008	1	8	0.103853	0.216412	STX1A	http://amigo.geneontology.org/amigo/term/GO:0043008
JUN kinase kinase kinase activity	Gene Ontology	GO:0004706	1	8	0.103853	0.216412	RIPK2	http://amigo.geneontology.org/amigo/term/GO:0004706
negative regulation of mitotic nuclear division	Gene Ontology	GO:0045839	1	8	0.103853	0.216412	BMP7	http://amigo.geneontology.org/amigo/term/GO:0045839
proteoglycan metabolic process	Gene Ontology	GO:0006029	1	8	0.103853	0.216412	COL11A1	http://amigo.geneontology.org/amigo/term/GO:0006029
protein transport	Gene Ontology	GO:0015031	7	320	0.104351	0.217306	DUOXA1|RAB7B|TESC|ABCB9|GOT1|SEC16B|XBP1	http://amigo.geneontology.org/amigo/term/GO:0015031
mRNA binding	Gene Ontology	GO:0003729	5	200	0.104708	0.217902	RBM38|IGF2BP3|ESRP1|MYEF2|PKM	http://amigo.geneontology.org/amigo/term/GO:0003729
centriole	Gene Ontology	GO:0005814	4	144	0.105886	0.220166	MAPK15|HSPA1A|HSPA6|ARMC9	http://amigo.geneontology.org/amigo/term/GO:0005814
specific granule membrane	Gene Ontology	GO:0035579	3	91	0.106079	0.220166	PLAUR|SLC2A3|OLR1	http://amigo.geneontology.org/amigo/term/GO:0035579
negative regulation of angiogenesis	Gene Ontology	GO:0016525	3	91	0.106079	0.220166	SEMA4A|SEMA3E|ADGRB2	http://amigo.geneontology.org/amigo/term/GO:0016525
thymus development	Gene Ontology	GO:0048538	2	44	0.106994	0.220361	HOXA3|SOD1	http://amigo.geneontology.org/amigo/term/GO:0048538
protein-DNA complex	Gene Ontology	GO:0032993	2	44	0.106994	0.220361	HMGA2|HOXA11	http://amigo.geneontology.org/amigo/term/GO:0032993
histone deacetylase complex	Gene Ontology	GO:0000118	2	44	0.106994	0.220361	MECOM|HR	http://amigo.geneontology.org/amigo/term/GO:0000118
negative regulation of cell adhesion	Gene Ontology	GO:0007162	2	44	0.106994	0.220361	ADAMDEC1|SEMA4D	http://amigo.geneontology.org/amigo/term/GO:0007162
positive regulation of protein secretion	Gene Ontology	GO:0050714	2	44	0.106994	0.220361	MYO18A|KCNN4	http://amigo.geneontology.org/amigo/term/GO:0050714
cardiac muscle contraction	Gene Ontology	GO:0060048	2	44	0.106994	0.220361	TNNI3|CXCR4	http://amigo.geneontology.org/amigo/term/GO:0060048
transport vesicle	Gene Ontology	GO:0030133	3	92	0.108608	0.220361	GALNT14|VGF|CNST	http://amigo.geneontology.org/amigo/term/GO:0030133
secretory granule	Gene Ontology	GO:0030141	3	92	0.108608	0.220361	STX1A|GAL|SCG2	http://amigo.geneontology.org/amigo/term/GO:0030141
transcription factor binding	Gene Ontology	GO:0008134	7	325	0.110612	0.220361	YWHAZ|NFATC4|NR0B2|HMGA2|HMGA1|FLNA|MYC	http://amigo.geneontology.org/amigo/term/GO:0008134
integral component of postsynaptic membrane	Gene Ontology	GO:0099055	2	45	0.110892	0.220361	EPHB2|NELL2	http://amigo.geneontology.org/amigo/term/GO:0099055
scavenger receptor activity	Gene Ontology	GO:0005044	2	45	0.110892	0.220361	TMPRSS13|PRSS12	http://amigo.geneontology.org/amigo/term/GO:0005044
negative regulation of osteoblast differentiation	Gene Ontology	GO:0045668	2	45	0.110892	0.220361	SEMA4D|SCG2	http://amigo.geneontology.org/amigo/term/GO:0045668
anatomical structure development	Gene Ontology	GO:0048856	2	45	0.110892	0.220361	VWDE|INSR	http://amigo.geneontology.org/amigo/term/GO:0048856
exocytosis	Gene Ontology	GO:0006887	3	93	0.11116	0.220361	STX1A|SCRN1|PRSS12	http://amigo.geneontology.org/amigo/term/GO:0006887
lipid droplet	Gene Ontology	GO:0005811	3	93	0.11116	0.220361	TMEM159|SCCPDH|LPCAT1	http://amigo.geneontology.org/amigo/term/GO:0005811
postsynapse	Gene Ontology	GO:0098794	3	93	0.11116	0.220361	EPHB2|FLNA|EIF4EBP2	http://amigo.geneontology.org/amigo/term/GO:0098794
STAT family protein binding	Gene Ontology	GO:0097677	1	9	0.114706	0.220361	PTPRT	http://amigo.geneontology.org/amigo/term/GO:0097677
L-aspartate transmembrane transporter activity	Gene Ontology	GO:0015183	1	9	0.114706	0.220361	SLC1A5	http://amigo.geneontology.org/amigo/term/GO:0015183
sperm connecting piece	Gene Ontology	GO:0097224	1	9	0.114706	0.220361	SPATC1L	http://amigo.geneontology.org/amigo/term/GO:0097224
fucosyltransferase activity	Gene Ontology	GO:0008417	1	9	0.114706	0.220361	FUT4	http://amigo.geneontology.org/amigo/term/GO:0008417
regulation of glucose transmembrane transport	Gene Ontology	GO:0010827	1	9	0.114706	0.220361	SLC2A1	http://amigo.geneontology.org/amigo/term/GO:0010827
mesenchymal to epithelial transition	Gene Ontology	GO:0060231	1	9	0.114706	0.220361	FZD7	http://amigo.geneontology.org/amigo/term/GO:0060231
negative regulation of hydrogen peroxide-induced cell death	Gene Ontology	GO:1903206	1	9	0.114706	0.220361	PYCR1	http://amigo.geneontology.org/amigo/term/GO:1903206
sulfation	Gene Ontology	GO:0051923	1	9	0.114706	0.220361	SULT1A1	http://amigo.geneontology.org/amigo/term/GO:0051923
genitalia development	Gene Ontology	GO:0048806	1	9	0.114706	0.220361	TIFAB	http://amigo.geneontology.org/amigo/term/GO:0048806
apical cortex	Gene Ontology	GO:0045179	1	9	0.114706	0.220361	SAPCD2	http://amigo.geneontology.org/amigo/term/GO:0045179
calcium-release channel activity	Gene Ontology	GO:0015278	1	9	0.114706	0.220361	ITPR3	http://amigo.geneontology.org/amigo/term/GO:0015278
phototransduction, visible light	Gene Ontology	GO:0007603	1	9	0.114706	0.220361	PDE6B	http://amigo.geneontology.org/amigo/term/GO:0007603
negative regulation of chromatin binding	Gene Ontology	GO:0035562	1	9	0.114706	0.220361	NFATC4	http://amigo.geneontology.org/amigo/term/GO:0035562
myeloid cell homeostasis	Gene Ontology	GO:0002262	1	9	0.114706	0.220361	SOD1	http://amigo.geneontology.org/amigo/term/GO:0002262
positive regulation of actin filament depolymerization	Gene Ontology	GO:0030836	1	9	0.114706	0.220361	CFL1	http://amigo.geneontology.org/amigo/term/GO:0030836
clathrin adaptor complex	Gene Ontology	GO:0030131	1	9	0.114706	0.220361	AP1M2	http://amigo.geneontology.org/amigo/term/GO:0030131
regulation of blood coagulation	Gene Ontology	GO:0030193	1	9	0.114706	0.220361	EPHB2	http://amigo.geneontology.org/amigo/term/GO:0030193
dolichyl-phosphate-mannose-protein mannosyltransferase activity	Gene Ontology	GO:0004169	1	9	0.114706	0.220361	TMTC2	http://amigo.geneontology.org/amigo/term/GO:0004169
progesterone receptor signaling pathway	Gene Ontology	GO:0050847	1	9	0.114706	0.220361	SRC	http://amigo.geneontology.org/amigo/term/GO:0050847
positive regulation of hepatocyte proliferation	Gene Ontology	GO:2000347	1	9	0.114706	0.220361	XBP1	http://amigo.geneontology.org/amigo/term/GO:2000347
NADP metabolic process	Gene Ontology	GO:0006739	1	9	0.114706	0.220361	G6PD	http://amigo.geneontology.org/amigo/term/GO:0006739
somatic stem cell division	Gene Ontology	GO:0048103	1	9	0.114706	0.220361	FZD7	http://amigo.geneontology.org/amigo/term/GO:0048103
negative regulation of cell division	Gene Ontology	GO:0051782	1	9	0.114706	0.220361	MYC	http://amigo.geneontology.org/amigo/term/GO:0051782
cellular nitrogen compound metabolic process	Gene Ontology	GO:0034641	1	9	0.114706	0.220361	GNMT	http://amigo.geneontology.org/amigo/term/GO:0034641
erythrocyte homeostasis	Gene Ontology	GO:0034101	1	9	0.114706	0.220361	AMPD3	http://amigo.geneontology.org/amigo/term/GO:0034101
regulation of vesicle-mediated transport	Gene Ontology	GO:0060627	1	9	0.114706	0.220361	FES	http://amigo.geneontology.org/amigo/term/GO:0060627
opsonization	Gene Ontology	GO:0008228	1	9	0.114706	0.220361	MBL2	http://amigo.geneontology.org/amigo/term/GO:0008228
clathrin vesicle coat	Gene Ontology	GO:0030125	1	9	0.114706	0.220361	CACNA1I	http://amigo.geneontology.org/amigo/term/GO:0030125
positive regulation of potassium ion transport	Gene Ontology	GO:0043268	1	9	0.114706	0.220361	STK39	http://amigo.geneontology.org/amigo/term/GO:0043268
interleukin-9-mediated signaling pathway	Gene Ontology	GO:0038113	1	9	0.114706	0.220361	IL2RG	http://amigo.geneontology.org/amigo/term/GO:0038113
cellular response to nicotine	Gene Ontology	GO:0071316	1	9	0.114706	0.220361	MSX1	http://amigo.geneontology.org/amigo/term/GO:0071316
establishment of centrosome localization	Gene Ontology	GO:0051660	1	9	0.114706	0.220361	MISP	http://amigo.geneontology.org/amigo/term/GO:0051660
positive regulation of synapse maturation	Gene Ontology	GO:0090129	1	9	0.114706	0.220361	ADGRL1	http://amigo.geneontology.org/amigo/term/GO:0090129
negative regulation of mitochondrial outer membrane permeabilization involved in apoptotic signaling pathway	Gene Ontology	GO:1901029	1	9	0.114706	0.220361	HSPA1A	http://amigo.geneontology.org/amigo/term/GO:1901029
branching involved in labyrinthine layer morphogenesis	Gene Ontology	GO:0060670	1	9	0.114706	0.220361	SPINT1	http://amigo.geneontology.org/amigo/term/GO:0060670
extracellular matrix constituent conferring elasticity	Gene Ontology	GO:0030023	1	9	0.114706	0.220361	EMILIN2	http://amigo.geneontology.org/amigo/term/GO:0030023
tubulin complex assembly	Gene Ontology	GO:0007021	1	9	0.114706	0.220361	ARL2	http://amigo.geneontology.org/amigo/term/GO:0007021
neuronal action potential propagation	Gene Ontology	GO:0019227	1	9	0.114706	0.220361	NRCAM	http://amigo.geneontology.org/amigo/term/GO:0019227
manganese ion transmembrane transport	Gene Ontology	GO:0071421	1	9	0.114706	0.220361	SLC11A1	http://amigo.geneontology.org/amigo/term/GO:0071421
diaphragm development	Gene Ontology	GO:0060539	1	9	0.114706	0.220361	ASS1	http://amigo.geneontology.org/amigo/term/GO:0060539
peroxisome fission	Gene Ontology	GO:0016559	1	9	0.114706	0.220361	SEC16B	http://amigo.geneontology.org/amigo/term/GO:0016559
ATF6-mediated unfolded protein response	Gene Ontology	GO:0036500	1	9	0.114706	0.220361	XBP1	http://amigo.geneontology.org/amigo/term/GO:0036500
multicellular organismal iron ion homeostasis	Gene Ontology	GO:0060586	1	9	0.114706	0.220361	SLC11A1	http://amigo.geneontology.org/amigo/term/GO:0060586
positive regulation of T-helper 1 type immune response	Gene Ontology	GO:0002827	1	9	0.114706	0.220361	SLC11A1	http://amigo.geneontology.org/amigo/term/GO:0002827
postsynapse to nucleus signaling pathway	Gene Ontology	GO:0099527	1	9	0.114706	0.220361	PRR7	http://amigo.geneontology.org/amigo/term/GO:0099527
negative regulation of CD4-positive, alpha-beta T cell proliferation	Gene Ontology	GO:2000562	1	9	0.114706	0.220361	LGALS9	http://amigo.geneontology.org/amigo/term/GO:2000562
positive regulation of voltage-gated potassium channel activity	Gene Ontology	GO:1903818	1	9	0.114706	0.220361	LRRC26	http://amigo.geneontology.org/amigo/term/GO:1903818
retinal binding	Gene Ontology	GO:0016918	1	9	0.114706	0.220361	CRABP2	http://amigo.geneontology.org/amigo/term/GO:0016918
female pronucleus	Gene Ontology	GO:0001939	1	9	0.114706	0.220361	SLC2A1	http://amigo.geneontology.org/amigo/term/GO:0001939
regulation of p38MAPK cascade	Gene Ontology	GO:1900744	1	9	0.114706	0.220361	LGALS9	http://amigo.geneontology.org/amigo/term/GO:1900744
parturition	Gene Ontology	GO:0007567	1	9	0.114706	0.220361	PTAFR	http://amigo.geneontology.org/amigo/term/GO:0007567
cellular response to testosterone stimulus	Gene Ontology	GO:0071394	1	9	0.114706	0.220361	AACS	http://amigo.geneontology.org/amigo/term/GO:0071394
axon guidance receptor activity	Gene Ontology	GO:0008046	1	9	0.114706	0.220361	EPHB2	http://amigo.geneontology.org/amigo/term/GO:0008046
excitatory chemical synaptic transmission	Gene Ontology	GO:0098976	1	9	0.114706	0.220361	PDLIM4	http://amigo.geneontology.org/amigo/term/GO:0098976
basic amino acid transmembrane transporter activity	Gene Ontology	GO:0015174	1	9	0.114706	0.220361	SLC7A1	http://amigo.geneontology.org/amigo/term/GO:0015174
amelogenesis	Gene Ontology	GO:0097186	1	9	0.114706	0.220361	RELT	http://amigo.geneontology.org/amigo/term/GO:0097186
positive regulation of alpha-beta T cell proliferation	Gene Ontology	GO:0046641	1	9	0.114706	0.220361	RIPK2	http://amigo.geneontology.org/amigo/term/GO:0046641
fructose 1,6-bisphosphate metabolic process	Gene Ontology	GO:0030388	1	9	0.114706	0.220361	PFKP	http://amigo.geneontology.org/amigo/term/GO:0030388
positive regulation of peroxisome proliferator activated receptor signaling pathway	Gene Ontology	GO:0035360	1	9	0.114706	0.220361	FABP5	http://amigo.geneontology.org/amigo/term/GO:0035360
cellular aldehyde metabolic process	Gene Ontology	GO:0006081	1	9	0.114706	0.220361	ALDH7A1	http://amigo.geneontology.org/amigo/term/GO:0006081
cuticular plate	Gene Ontology	GO:0032437	1	9	0.114706	0.220361	FCHSD1	http://amigo.geneontology.org/amigo/term/GO:0032437
AP-3 adaptor complex	Gene Ontology	GO:0030123	1	9	0.114706	0.220361	AP3B2	http://amigo.geneontology.org/amigo/term/GO:0030123
keratinocyte development	Gene Ontology	GO:0003334	1	9	0.114706	0.220361	FOSL2	http://amigo.geneontology.org/amigo/term/GO:0003334
iron ion transmembrane transporter activity	Gene Ontology	GO:0005381	1	9	0.114706	0.220361	SLC11A1	http://amigo.geneontology.org/amigo/term/GO:0005381
platelet dense tubular network membrane	Gene Ontology	GO:0031095	1	9	0.114706	0.220361	ITPR3	http://amigo.geneontology.org/amigo/term/GO:0031095
monosaccharide binding	Gene Ontology	GO:0048029	1	9	0.114706	0.220361	PFKP	http://amigo.geneontology.org/amigo/term/GO:0048029
negative regulation of dendrite morphogenesis	Gene Ontology	GO:0050774	1	9	0.114706	0.220361	NFATC4	http://amigo.geneontology.org/amigo/term/GO:0050774
chondroitin sulfate proteoglycan biosynthetic process	Gene Ontology	GO:0050650	1	9	0.114706	0.220361	XYLT1	http://amigo.geneontology.org/amigo/term/GO:0050650
cellular response to parathyroid hormone stimulus	Gene Ontology	GO:0071374	1	9	0.114706	0.220361	WNT10B	http://amigo.geneontology.org/amigo/term/GO:0071374
ferroxidase activity	Gene Ontology	GO:0004322	1	9	0.114706	0.220361	HEPH	http://amigo.geneontology.org/amigo/term/GO:0004322
MICOS complex	Gene Ontology	GO:0061617	1	9	0.114706	0.220361	CHCHD10	http://amigo.geneontology.org/amigo/term/GO:0061617
craniofacial suture morphogenesis	Gene Ontology	GO:0097094	1	9	0.114706	0.220361	TIFAB	http://amigo.geneontology.org/amigo/term/GO:0097094
arginine binding	Gene Ontology	GO:0034618	1	9	0.114706	0.220361	TM4SF5	http://amigo.geneontology.org/amigo/term/GO:0034618
positive regulation of chemokine (C-X-C motif) ligand 2 production	Gene Ontology	GO:2000343	1	9	0.114706	0.220361	MBL2	http://amigo.geneontology.org/amigo/term/GO:2000343
antigen processing and presentation of endogenous peptide antigen via MHC class I	Gene Ontology	GO:0019885	1	9	0.114706	0.220361	ABCB9	http://amigo.geneontology.org/amigo/term/GO:0019885
negative regulation of myelination	Gene Ontology	GO:0031642	1	9	0.114706	0.220361	MTMR2	http://amigo.geneontology.org/amigo/term/GO:0031642
SREBP signaling pathway	Gene Ontology	GO:0032933	1	9	0.114706	0.220361	ARHGEF10L	http://amigo.geneontology.org/amigo/term/GO:0032933
sexual reproduction	Gene Ontology	GO:0019953	1	9	0.114706	0.220361	VGF	http://amigo.geneontology.org/amigo/term/GO:0019953
cAMP catabolic process	Gene Ontology	GO:0006198	1	9	0.114706	0.220361	PDE7A	http://amigo.geneontology.org/amigo/term/GO:0006198
negative regulation of toll-like receptor 4 signaling pathway	Gene Ontology	GO:0034144	1	9	0.114706	0.220361	RAB7B	http://amigo.geneontology.org/amigo/term/GO:0034144
negative regulation of cAMP-dependent protein kinase activity	Gene Ontology	GO:2000480	1	9	0.114706	0.220361	PKIA	http://amigo.geneontology.org/amigo/term/GO:2000480
positive regulation of cardiac muscle cell differentiation	Gene Ontology	GO:2000727	1	9	0.114706	0.220361	EFNB2	http://amigo.geneontology.org/amigo/term/GO:2000727
sequestering of actin monomers	Gene Ontology	GO:0042989	1	9	0.114706	0.220361	TMSB10	http://amigo.geneontology.org/amigo/term/GO:0042989
cell recognition	Gene Ontology	GO:0008037	1	9	0.114706	0.220361	VCAN	http://amigo.geneontology.org/amigo/term/GO:0008037
elongin complex	Gene Ontology	GO:0070449	1	9	0.114706	0.220361	EPOP	http://amigo.geneontology.org/amigo/term/GO:0070449
peptidyl-tyrosine dephosphorylation involved in inactivation of protein kinase activity	Gene Ontology	GO:1990264	1	9	0.114706	0.220361	PTPRT	http://amigo.geneontology.org/amigo/term/GO:1990264
L-fucose catabolic process	Gene Ontology	GO:0042355	1	9	0.114706	0.220361	FUT4	http://amigo.geneontology.org/amigo/term/GO:0042355
positive regulation of male gonad development	Gene Ontology	GO:2000020	1	9	0.114706	0.220361	SEMA3A	http://amigo.geneontology.org/amigo/term/GO:2000020
regulation of neurotransmitter receptor localization to postsynaptic specialization membrane	Gene Ontology	GO:0098696	1	9	0.114706	0.220361	GPC4	http://amigo.geneontology.org/amigo/term/GO:0098696
aryl hydrocarbon receptor binding	Gene Ontology	GO:0017162	1	9	0.114706	0.220361	ARNTL	http://amigo.geneontology.org/amigo/term/GO:0017162
response to transforming growth factor beta	Gene Ontology	GO:0071559	1	9	0.114706	0.220361	SCG2	http://amigo.geneontology.org/amigo/term/GO:0071559
ketone body biosynthetic process	Gene Ontology	GO:0046951	1	9	0.114706	0.220361	AACS	http://amigo.geneontology.org/amigo/term/GO:0046951
protein kinase C activity	Gene Ontology	GO:0004697	1	9	0.114706	0.220361	PRKCD	http://amigo.geneontology.org/amigo/term/GO:0004697
kidney morphogenesis	Gene Ontology	GO:0060993	1	9	0.114706	0.220361	GCNT3	http://amigo.geneontology.org/amigo/term/GO:0060993
phagosome-lysosome fusion	Gene Ontology	GO:0090385	1	9	0.114706	0.220361	RAB7B	http://amigo.geneontology.org/amigo/term/GO:0090385
mitochondrial outer membrane translocase complex	Gene Ontology	GO:0005742	1	9	0.114706	0.220361	TOMM40L	http://amigo.geneontology.org/amigo/term/GO:0005742
regulation of lipoprotein lipase activity	Gene Ontology	GO:0051004	1	9	0.114706	0.220361	FURIN	http://amigo.geneontology.org/amigo/term/GO:0051004
negative regulation of sodium ion transmembrane transporter activity	Gene Ontology	GO:2000650	1	9	0.114706	0.220361	STK39	http://amigo.geneontology.org/amigo/term/GO:2000650
guanylate kinase activity	Gene Ontology	GO:0004385	1	9	0.114706	0.220361	CARD11	http://amigo.geneontology.org/amigo/term/GO:0004385
positive regulation of protein acetylation	Gene Ontology	GO:1901985	1	9	0.114706	0.220361	ARNTL	http://amigo.geneontology.org/amigo/term/GO:1901985
negative regulation of fat cell differentiation	Gene Ontology	GO:0045599	2	46	0.114826	0.220361	ARNTL|WNT10B	http://amigo.geneontology.org/amigo/term/GO:0045599
interleukin-12-mediated signaling pathway	Gene Ontology	GO:0035722	2	46	0.114826	0.220361	CFL1|SOD1	http://amigo.geneontology.org/amigo/term/GO:0035722
voltage-gated ion channel activity	Gene Ontology	GO:0005244	2	46	0.114826	0.220361	CLIC3|CLIC1	http://amigo.geneontology.org/amigo/term/GO:0005244
negative regulation of GTPase activity	Gene Ontology	GO:0034260	2	46	0.114826	0.220361	RCC2|ARL2	http://amigo.geneontology.org/amigo/term/GO:0034260
negative regulation of endopeptidase activity	Gene Ontology	GO:0010951	4	149	0.115761	0.222019	SPINT1|SPOCK2|SERPINE2|FURIN	http://amigo.geneontology.org/amigo/term/GO:0010951
regulation of cell shape	Gene Ontology	GO:0008360	4	150	0.117783	0.225523	SEMA4A|SEMA3E|SEMA4D|FES	http://amigo.geneontology.org/amigo/term/GO:0008360
JNK cascade	Gene Ontology	GO:0007254	2	47	0.118795	0.225523	RIPK2|SH2D3A	http://amigo.geneontology.org/amigo/term/GO:0007254
negative regulation of cold-induced thermogenesis	Gene Ontology	GO:0120163	2	47	0.118795	0.225523	ARNTL|WNT10B	http://amigo.geneontology.org/amigo/term/GO:0120163
negative regulation of Wnt signaling pathway	Gene Ontology	GO:0030178	2	47	0.118795	0.225523	NFATC4|SFRP4	http://amigo.geneontology.org/amigo/term/GO:0030178
endosome to lysosome transport	Gene Ontology	GO:0008333	2	47	0.118795	0.225523	RAB7B|ADRB2	http://amigo.geneontology.org/amigo/term/GO:0008333
transforming growth factor beta receptor signaling pathway	Gene Ontology	GO:0007179	3	96	0.118951	0.225523	SRC|FURIN|CGN	http://amigo.geneontology.org/amigo/term/GO:0007179
microtubule organizing center	Gene Ontology	GO:0005815	3	96	0.118951	0.225523	RASSF1|FAM110A|TEKT2	http://amigo.geneontology.org/amigo/term/GO:0005815
defense response to bacterium	Gene Ontology	GO:0042742	5	209	0.119578	0.225523	VGF|SLC11A1|MBL2|PRKCD|S100A14	http://amigo.geneontology.org/amigo/term/GO:0042742
ciliary basal body	Gene Ontology	GO:0036064	4	151	0.119821	0.225523	MLF1|DISC1|MAPK15|ARMC9	http://amigo.geneontology.org/amigo/term/GO:0036064
protein kinase binding	Gene Ontology	GO:0019901	9	461	0.119969	0.225523	YWHAZ|RCC2|FAM83E|EGFR|PRKCD|TNNI3|STK39|FAM83B|NBEAL2	http://amigo.geneontology.org/amigo/term/GO:0019901
double-stranded DNA binding	Gene Ontology	GO:0003690	3	97	0.121592	0.225523	EGFR|SCG2|YBX3	http://amigo.geneontology.org/amigo/term/GO:0003690
sodium ion transmembrane transport	Gene Ontology	GO:0035725	3	97	0.121592	0.225523	SLC6A8|ATP1B3|SLC6A6	http://amigo.geneontology.org/amigo/term/GO:0035725
cellular response to glucose starvation	Gene Ontology	GO:0042149	2	48	0.122799	0.225523	SLC2A1|XBP1	http://amigo.geneontology.org/amigo/term/GO:0042149
collagen fibril organization	Gene Ontology	GO:0030199	2	48	0.122799	0.225523	COMP|COL11A1	http://amigo.geneontology.org/amigo/term/GO:0030199
response to peptide hormone	Gene Ontology	GO:0043434	2	48	0.122799	0.225523	BMP7|SLC7A11	http://amigo.geneontology.org/amigo/term/GO:0043434
Rho guanyl-nucleotide exchange factor activity	Gene Ontology	GO:0005089	2	48	0.122799	0.225523	ARHGEF10L|ARHGEF38	http://amigo.geneontology.org/amigo/term/GO:0005089
myelination	Gene Ontology	GO:0042552	2	48	0.122799	0.225523	GAL3ST1|MBL2	http://amigo.geneontology.org/amigo/term/GO:0042552
serine-type endopeptidase inhibitor activity	Gene Ontology	GO:0004867	3	98	0.124254	0.225523	SPINT1|SERPINE2|FURIN	http://amigo.geneontology.org/amigo/term/GO:0004867
adenylate cyclase activity	Gene Ontology	GO:0004016	1	10	0.125428	0.225523	ADCY3	http://amigo.geneontology.org/amigo/term/GO:0004016
negative regulation of heterotypic cell-cell adhesion	Gene Ontology	GO:0034115	1	10	0.125428	0.225523	MBL2	http://amigo.geneontology.org/amigo/term/GO:0034115
biosynthetic process	Gene Ontology	GO:0009058	1	10	0.125428	0.225523	ALDH1L1	http://amigo.geneontology.org/amigo/term/GO:0009058
response to dexamethasone	Gene Ontology	GO:0071548	1	10	0.125428	0.225523	PTAFR	http://amigo.geneontology.org/amigo/term/GO:0071548
protein insertion into membrane	Gene Ontology	GO:0051205	1	10	0.125428	0.225523	EGFR	http://amigo.geneontology.org/amigo/term/GO:0051205
regulation of macrophage activation	Gene Ontology	GO:0043030	1	10	0.125428	0.225523	MYO18A	http://amigo.geneontology.org/amigo/term/GO:0043030
plasma membrane protein complex	Gene Ontology	GO:0098797	1	10	0.125428	0.225523	SLC6A6	http://amigo.geneontology.org/amigo/term/GO:0098797
negative regulation of inclusion body assembly	Gene Ontology	GO:0090084	1	10	0.125428	0.225523	HSPA1A	http://amigo.geneontology.org/amigo/term/GO:0090084
negative regulation of voltage-gated calcium channel activity	Gene Ontology	GO:1901386	1	10	0.125428	0.225523	GPR35	http://amigo.geneontology.org/amigo/term/GO:1901386
neuron projection maintenance	Gene Ontology	GO:1990535	1	10	0.125428	0.225523	INSR	http://amigo.geneontology.org/amigo/term/GO:1990535
peripheral nervous system neuron development	Gene Ontology	GO:0048935	1	10	0.125428	0.225523	RUNX1	http://amigo.geneontology.org/amigo/term/GO:0048935
regulation of B cell differentiation	Gene Ontology	GO:0045577	1	10	0.125428	0.225523	CARD11	http://amigo.geneontology.org/amigo/term/GO:0045577
negative regulation of sprouting angiogenesis	Gene Ontology	GO:1903671	1	10	0.125428	0.225523	CREB3L1	http://amigo.geneontology.org/amigo/term/GO:1903671
peristalsis	Gene Ontology	GO:0030432	1	10	0.125428	0.225523	TIFAB	http://amigo.geneontology.org/amigo/term/GO:0030432
regulation of myeloid cell differentiation	Gene Ontology	GO:0045637	1	10	0.125428	0.225523	RUNX1	http://amigo.geneontology.org/amigo/term/GO:0045637
glycerophospholipid biosynthetic process	Gene Ontology	GO:0046474	1	10	0.125428	0.225523	CPNE7	http://amigo.geneontology.org/amigo/term/GO:0046474
store-operated calcium channel activity	Gene Ontology	GO:0015279	1	10	0.125428	0.225523	ORAI2	http://amigo.geneontology.org/amigo/term/GO:0015279
rough endoplasmic reticulum membrane	Gene Ontology	GO:0030867	1	10	0.125428	0.225523	NAT8L	http://amigo.geneontology.org/amigo/term/GO:0030867
negative regulation of cell adhesion mediated by integrin	Gene Ontology	GO:0033629	1	10	0.125428	0.225523	MUC1	http://amigo.geneontology.org/amigo/term/GO:0033629
intraciliary retrograde transport	Gene Ontology	GO:0035721	1	10	0.125428	0.225523	DYNC2H1	http://amigo.geneontology.org/amigo/term/GO:0035721
hydrolase activity, hydrolyzing O-glycosyl compounds	Gene Ontology	GO:0004553	1	10	0.125428	0.225523	CHIT1	http://amigo.geneontology.org/amigo/term/GO:0004553
endoplasmic reticulum chaperone complex	Gene Ontology	GO:0034663	1	10	0.125428	0.225523	UGT1A10	http://amigo.geneontology.org/amigo/term/GO:0034663
muscle structure development	Gene Ontology	GO:0061061	1	10	0.125428	0.225523	PDLIM4	http://amigo.geneontology.org/amigo/term/GO:0061061
positive regulation of cytokine-mediated signaling pathway	Gene Ontology	GO:0001961	1	10	0.125428	0.225523	RIPK2	http://amigo.geneontology.org/amigo/term/GO:0001961
regulation of chondrocyte differentiation	Gene Ontology	GO:0032330	1	10	0.125428	0.225523	PTHLH	http://amigo.geneontology.org/amigo/term/GO:0032330
GMP metabolic process	Gene Ontology	GO:0046037	1	10	0.125428	0.225523	CARD11	http://amigo.geneontology.org/amigo/term/GO:0046037
endoplasmic reticulum-plasma membrane contact site	Gene Ontology	GO:0140268	1	10	0.125428	0.225523	GRAMD1B	http://amigo.geneontology.org/amigo/term/GO:0140268
meiotic spindle	Gene Ontology	GO:0072687	1	10	0.125428	0.225523	MAPK15	http://amigo.geneontology.org/amigo/term/GO:0072687
glycosaminoglycan metabolic process	Gene Ontology	GO:0030203	1	10	0.125428	0.225523	XYLT1	http://amigo.geneontology.org/amigo/term/GO:0030203
glutamate binding	Gene Ontology	GO:0016595	1	10	0.125428	0.225523	GAD1	http://amigo.geneontology.org/amigo/term/GO:0016595
regulation of mast cell degranulation	Gene Ontology	GO:0043304	1	10	0.125428	0.225523	FES	http://amigo.geneontology.org/amigo/term/GO:0043304
negative regulation of cell-cell adhesion mediated by cadherin	Gene Ontology	GO:2000048	1	10	0.125428	0.225523	EPCAM	http://amigo.geneontology.org/amigo/term/GO:2000048
forelimb morphogenesis	Gene Ontology	GO:0035136	1	10	0.125428	0.225523	ZBTB16	http://amigo.geneontology.org/amigo/term/GO:0035136
negative regulation of transcription by competitive promoter binding	Gene Ontology	GO:0010944	1	10	0.125428	0.225523	MUC1	http://amigo.geneontology.org/amigo/term/GO:0010944
postsynaptic membrane assembly	Gene Ontology	GO:0097104	1	10	0.125428	0.225523	EPHB2	http://amigo.geneontology.org/amigo/term/GO:0097104
negative regulation of potassium ion transmembrane transport	Gene Ontology	GO:1901380	1	10	0.125428	0.225523	STK39	http://amigo.geneontology.org/amigo/term/GO:1901380
CatSper complex	Gene Ontology	GO:0036128	1	10	0.125428	0.225523	CATSPER1	http://amigo.geneontology.org/amigo/term/GO:0036128
complement activation, lectin pathway	Gene Ontology	GO:0001867	1	10	0.125428	0.225523	MBL2	http://amigo.geneontology.org/amigo/term/GO:0001867
tube formation	Gene Ontology	GO:0035148	1	10	0.125428	0.225523	YWHAZ	http://amigo.geneontology.org/amigo/term/GO:0035148
protein tyrosine/threonine phosphatase activity	Gene Ontology	GO:0008330	1	10	0.125428	0.225523	DUSP4	http://amigo.geneontology.org/amigo/term/GO:0008330
regulation of epidermal growth factor receptor signaling pathway	Gene Ontology	GO:0042058	1	10	0.125428	0.225523	WDR54	http://amigo.geneontology.org/amigo/term/GO:0042058
metalloexopeptidase activity	Gene Ontology	GO:0008235	1	10	0.125428	0.225523	CXCR4	http://amigo.geneontology.org/amigo/term/GO:0008235
membrane repolarization	Gene Ontology	GO:0086009	1	10	0.125428	0.225523	ATP1B3	http://amigo.geneontology.org/amigo/term/GO:0086009
negative regulation of natural killer cell mediated cytotoxicity	Gene Ontology	GO:0045953	1	10	0.125428	0.225523	LGALS9	http://amigo.geneontology.org/amigo/term/GO:0045953
organ induction	Gene Ontology	GO:0001759	1	10	0.125428	0.225523	HOXA11	http://amigo.geneontology.org/amigo/term/GO:0001759
positive regulation of RNA polymerase II transcription preinitiation complex assembly	Gene Ontology	GO:0045899	1	10	0.125428	0.225523	WNT10B	http://amigo.geneontology.org/amigo/term/GO:0045899
cellular response to lipoteichoic acid	Gene Ontology	GO:0071223	1	10	0.125428	0.225523	RIPK2	http://amigo.geneontology.org/amigo/term/GO:0071223
chloride channel inhibitor activity	Gene Ontology	GO:0019869	1	10	0.125428	0.225523	STX1A	http://amigo.geneontology.org/amigo/term/GO:0019869
phosphatidylinositol 3-kinase regulatory subunit binding	Gene Ontology	GO:0036312	1	10	0.125428	0.225523	FAM83B	http://amigo.geneontology.org/amigo/term/GO:0036312
oxalate transmembrane transporter activity	Gene Ontology	GO:0019531	1	10	0.125428	0.225523	SLC26A9	http://amigo.geneontology.org/amigo/term/GO:0019531
positive regulation of viral entry into host cell	Gene Ontology	GO:0046598	1	10	0.125428	0.225523	LGALS9	http://amigo.geneontology.org/amigo/term/GO:0046598
response to interferon-alpha	Gene Ontology	GO:0035455	1	10	0.125428	0.225523	MX2	http://amigo.geneontology.org/amigo/term/GO:0035455
alpha-catenin binding	Gene Ontology	GO:0045294	1	10	0.125428	0.225523	PTPRT	http://amigo.geneontology.org/amigo/term/GO:0045294
cobalamin binding	Gene Ontology	GO:0031419	1	10	0.125428	0.225523	MMACHC	http://amigo.geneontology.org/amigo/term/GO:0031419
regulation of phagocytosis	Gene Ontology	GO:0050764	1	10	0.125428	0.225523	SPHK1	http://amigo.geneontology.org/amigo/term/GO:0050764
prostate gland development	Gene Ontology	GO:0030850	1	10	0.125428	0.225523	GLI1	http://amigo.geneontology.org/amigo/term/GO:0030850
structural constituent of myelin sheath	Gene Ontology	GO:0019911	1	10	0.125428	0.225523	MBL2	http://amigo.geneontology.org/amigo/term/GO:0019911
histone methyltransferase activity (H3-K9 specific)	Gene Ontology	GO:0046974	1	10	0.125428	0.225523	MECOM	http://amigo.geneontology.org/amigo/term/GO:0046974
myosin II binding	Gene Ontology	GO:0045159	1	10	0.125428	0.225523	SHROOM1	http://amigo.geneontology.org/amigo/term/GO:0045159
basement membrane assembly	Gene Ontology	GO:0070831	1	10	0.125428	0.225523	LAMB1	http://amigo.geneontology.org/amigo/term/GO:0070831
regulation of ruffle assembly	Gene Ontology	GO:1900027	1	10	0.125428	0.225523	RCC2	http://amigo.geneontology.org/amigo/term/GO:1900027
oxalate transport	Gene Ontology	GO:0019532	1	10	0.125428	0.225523	SLC26A9	http://amigo.geneontology.org/amigo/term/GO:0019532
regulation of bone resorption	Gene Ontology	GO:0045124	1	10	0.125428	0.225523	SRC	http://amigo.geneontology.org/amigo/term/GO:0045124
sphingosine-1-phosphate receptor signaling pathway	Gene Ontology	GO:0003376	1	10	0.125428	0.225523	SPHK1	http://amigo.geneontology.org/amigo/term/GO:0003376
response to selenium ion	Gene Ontology	GO:0010269	1	10	0.125428	0.225523	SELENOM	http://amigo.geneontology.org/amigo/term/GO:0010269
cAMP biosynthetic process	Gene Ontology	GO:0006171	1	10	0.125428	0.225523	ADCY3	http://amigo.geneontology.org/amigo/term/GO:0006171
intermediate filament binding	Gene Ontology	GO:0019215	1	10	0.125428	0.225523	EVPL	http://amigo.geneontology.org/amigo/term/GO:0019215
positive regulation of MHC class II biosynthetic process	Gene Ontology	GO:0045348	1	10	0.125428	0.225523	XBP1	http://amigo.geneontology.org/amigo/term/GO:0045348
positive regulation of guanylate cyclase activity	Gene Ontology	GO:0031284	1	10	0.125428	0.225523	GUCA2A	http://amigo.geneontology.org/amigo/term/GO:0031284
butyrate-CoA ligase activity	Gene Ontology	GO:0047760	1	10	0.125428	0.225523	AACS	http://amigo.geneontology.org/amigo/term/GO:0047760
histone H3-K9 methylation	Gene Ontology	GO:0051567	1	10	0.125428	0.225523	MECOM	http://amigo.geneontology.org/amigo/term/GO:0051567
integral component of organelle membrane	Gene Ontology	GO:0031301	1	10	0.125428	0.225523	VOPP1	http://amigo.geneontology.org/amigo/term/GO:0031301
growth factor receptor binding	Gene Ontology	GO:0070851	1	10	0.125428	0.225523	SRC	http://amigo.geneontology.org/amigo/term/GO:0070851
positive regulation of mitochondrial outer membrane permeabilization involved in apoptotic signaling pathway	Gene Ontology	GO:1901030	1	10	0.125428	0.225523	CHCHD10	http://amigo.geneontology.org/amigo/term/GO:1901030
tetrahydrofolate interconversion	Gene Ontology	GO:0035999	1	10	0.125428	0.225523	MTHFD2	http://amigo.geneontology.org/amigo/term/GO:0035999
phospholipid scramblase activity	Gene Ontology	GO:0017128	1	10	0.125428	0.225523	ANO9	http://amigo.geneontology.org/amigo/term/GO:0017128
regulation of RNA metabolic process	Gene Ontology	GO:0051252	1	10	0.125428	0.225523	IGF2BP3	http://amigo.geneontology.org/amigo/term/GO:0051252
eukaryotic initiation factor 4E binding	Gene Ontology	GO:0008190	1	10	0.125428	0.225523	EIF4EBP2	http://amigo.geneontology.org/amigo/term/GO:0008190
negative regulation of cell growth involved in cardiac muscle cell development	Gene Ontology	GO:0061052	1	10	0.125428	0.225523	G6PD	http://amigo.geneontology.org/amigo/term/GO:0061052
positive regulation of monocyte chemotactic protein-1 production	Gene Ontology	GO:0071639	1	10	0.125428	0.225523	LGALS9	http://amigo.geneontology.org/amigo/term/GO:0071639
response to dietary excess	Gene Ontology	GO:0002021	1	10	0.125428	0.225523	VGF	http://amigo.geneontology.org/amigo/term/GO:0002021
netrin-activated signaling pathway	Gene Ontology	GO:0038007	1	10	0.125428	0.225523	TUBB3	http://amigo.geneontology.org/amigo/term/GO:0038007
positive regulation of glucose metabolic process	Gene Ontology	GO:0010907	1	10	0.125428	0.225523	SRC	http://amigo.geneontology.org/amigo/term/GO:0010907
peptide hormone receptor binding	Gene Ontology	GO:0051428	1	10	0.125428	0.225523	PTHLH	http://amigo.geneontology.org/amigo/term/GO:0051428
post-mRNA release spliceosomal complex	Gene Ontology	GO:0071014	1	10	0.125428	0.225523	MYEF2	http://amigo.geneontology.org/amigo/term/GO:0071014
negative regulation of tumor necrosis factor production	Gene Ontology	GO:0032720	2	49	0.126834	0.227525	LGALS9|GPNMB	http://amigo.geneontology.org/amigo/term/GO:0032720
protein destabilization	Gene Ontology	GO:0031648	2	49	0.126834	0.227525	SRC|XBP1	http://amigo.geneontology.org/amigo/term/GO:0031648
ribonucleoprotein complex	Gene Ontology	GO:1990904	4	156	0.130232	0.233352	HSPA1A|ESRP1|MYEF2|VIM	http://amigo.geneontology.org/amigo/term/GO:1990904
cytoplasmic microtubule organization	Gene Ontology	GO:0031122	2	50	0.130901	0.233747	CLIP2|CEP126	http://amigo.geneontology.org/amigo/term/GO:0031122
E-box binding	Gene Ontology	GO:0070888	2	50	0.130901	0.233747	ARNTL|MYC	http://amigo.geneontology.org/amigo/term/GO:0070888
regulation of synaptic vesicle exocytosis	Gene Ontology	GO:2000300	2	50	0.130901	0.233747	CHRNA4|CHRNA5	http://amigo.geneontology.org/amigo/term/GO:2000300
response to oxidative stress	Gene Ontology	GO:0006979	3	101	0.132366	0.233747	CHRNA4|PRDX6|MBL2	http://amigo.geneontology.org/amigo/term/GO:0006979
cellular response to lipopolysaccharide	Gene Ontology	GO:0071222	4	158	0.134499	0.233747	SRC|XBP1|ASS1|VIM	http://amigo.geneontology.org/amigo/term/GO:0071222
cellular response to UV	Gene Ontology	GO:0034644	2	51	0.134997	0.233747	MYC|NFATC4	http://amigo.geneontology.org/amigo/term/GO:0034644
repressing transcription factor binding	Gene Ontology	GO:0070491	2	51	0.134997	0.233747	ARNTL|MYC	http://amigo.geneontology.org/amigo/term/GO:0070491
social behavior	Gene Ontology	GO:0035176	2	51	0.134997	0.233747	GAD1|EIF4EBP2	http://amigo.geneontology.org/amigo/term/GO:0035176
cellular response to angiotensin	Gene Ontology	GO:1904385	1	11	0.13602	0.233747	PRKCD	http://amigo.geneontology.org/amigo/term/GO:1904385
regulation of synapse structure or activity	Gene Ontology	GO:0050803	1	11	0.13602	0.233747	MX2	http://amigo.geneontology.org/amigo/term/GO:0050803
interleukin-2-mediated signaling pathway	Gene Ontology	GO:0038110	1	11	0.13602	0.233747	IL2RG	http://amigo.geneontology.org/amigo/term/GO:0038110
male sex determination	Gene Ontology	GO:0030238	1	11	0.13602	0.233747	INSR	http://amigo.geneontology.org/amigo/term/GO:0030238
activation of JNKK activity	Gene Ontology	GO:0007256	1	11	0.13602	0.233747	RIPK2	http://amigo.geneontology.org/amigo/term/GO:0007256
protein serine/threonine phosphatase inhibitor activity	Gene Ontology	GO:0004865	1	11	0.13602	0.233747	PPP1R14D	http://amigo.geneontology.org/amigo/term/GO:0004865
negative regulation of multicellular organism growth	Gene Ontology	GO:0040015	1	11	0.13602	0.233747	ADRB2	http://amigo.geneontology.org/amigo/term/GO:0040015
positive regulation of astrocyte differentiation	Gene Ontology	GO:0048711	1	11	0.13602	0.233747	SERPINE2	http://amigo.geneontology.org/amigo/term/GO:0048711
fucosylation	Gene Ontology	GO:0036065	1	11	0.13602	0.233747	FUT4	http://amigo.geneontology.org/amigo/term/GO:0036065
negative regulation of excitatory postsynaptic potential	Gene Ontology	GO:0090394	1	11	0.13602	0.233747	MTMR2	http://amigo.geneontology.org/amigo/term/GO:0090394
toxic substance binding	Gene Ontology	GO:0015643	1	11	0.13602	0.233747	ASS1	http://amigo.geneontology.org/amigo/term/GO:0015643
retrograde axonal transport	Gene Ontology	GO:0008090	1	11	0.13602	0.233747	SOD1	http://amigo.geneontology.org/amigo/term/GO:0008090
positive regulation of potassium ion transmembrane transport	Gene Ontology	GO:1901381	1	11	0.13602	0.233747	FLNA	http://amigo.geneontology.org/amigo/term/GO:1901381
tongue development	Gene Ontology	GO:0043586	1	11	0.13602	0.233747	EGFR	http://amigo.geneontology.org/amigo/term/GO:0043586
glycerolipid metabolic process	Gene Ontology	GO:0046486	1	11	0.13602	0.233747	GAL3ST1	http://amigo.geneontology.org/amigo/term/GO:0046486
regulation of microtubule polymerization	Gene Ontology	GO:0031113	1	11	0.13602	0.233747	ARL2	http://amigo.geneontology.org/amigo/term/GO:0031113
urea cycle	Gene Ontology	GO:0000050	1	11	0.13602	0.233747	ASS1	http://amigo.geneontology.org/amigo/term/GO:0000050
cellular response to follicle-stimulating hormone stimulus	Gene Ontology	GO:0071372	1	11	0.13602	0.233747	EFNA5	http://amigo.geneontology.org/amigo/term/GO:0071372
epithelial cilium movement involved in determination of left/right asymmetry	Gene Ontology	GO:0060287	1	11	0.13602	0.233747	LRRC6	http://amigo.geneontology.org/amigo/term/GO:0060287
semaphorin receptor complex	Gene Ontology	GO:0002116	1	11	0.13602	0.233747	NELL2	http://amigo.geneontology.org/amigo/term/GO:0002116
SNARE complex assembly	Gene Ontology	GO:0035493	1	11	0.13602	0.233747	STX1A	http://amigo.geneontology.org/amigo/term/GO:0035493
wound healing, spreading of epidermal cells	Gene Ontology	GO:0035313	1	11	0.13602	0.233747	MMP12	http://amigo.geneontology.org/amigo/term/GO:0035313
purine nucleotide metabolic process	Gene Ontology	GO:0006163	1	11	0.13602	0.233747	AK8	http://amigo.geneontology.org/amigo/term/GO:0006163
cyclooxygenase pathway	Gene Ontology	GO:0019371	1	11	0.13602	0.233747	PTGDS	http://amigo.geneontology.org/amigo/term/GO:0019371
glucose 6-phosphate metabolic process	Gene Ontology	GO:0051156	1	11	0.13602	0.233747	G6PD	http://amigo.geneontology.org/amigo/term/GO:0051156
rhodopsin mediated signaling pathway	Gene Ontology	GO:0016056	1	11	0.13602	0.233747	PDE6B	http://amigo.geneontology.org/amigo/term/GO:0016056
leukocyte migration involved in inflammatory response	Gene Ontology	GO:0002523	1	11	0.13602	0.233747	CCR6	http://amigo.geneontology.org/amigo/term/GO:0002523
regulation of B cell receptor signaling pathway	Gene Ontology	GO:0050855	1	11	0.13602	0.233747	RUNX1	http://amigo.geneontology.org/amigo/term/GO:0050855
high-density lipoprotein particle binding	Gene Ontology	GO:0008035	1	11	0.13602	0.233747	LRP8	http://amigo.geneontology.org/amigo/term/GO:0008035
phosphatidylethanolamine binding	Gene Ontology	GO:0008429	1	11	0.13602	0.233747	MUC1	http://amigo.geneontology.org/amigo/term/GO:0008429
potassium:proton antiporter activity	Gene Ontology	GO:0015386	1	11	0.13602	0.233747	SLC9A2	http://amigo.geneontology.org/amigo/term/GO:0015386
positive regulation of tumor necrosis factor-mediated signaling pathway	Gene Ontology	GO:1903265	1	11	0.13602	0.233747	HSPA1A	http://amigo.geneontology.org/amigo/term/GO:1903265
positive regulation of acute inflammatory response	Gene Ontology	GO:0002675	1	11	0.13602	0.233747	CREB3L3	http://amigo.geneontology.org/amigo/term/GO:0002675
GTP biosynthetic process	Gene Ontology	GO:0006183	1	11	0.13602	0.233747	IMPDH1	http://amigo.geneontology.org/amigo/term/GO:0006183
COPI-coated vesicle	Gene Ontology	GO:0030137	1	11	0.13602	0.233747	PACS1	http://amigo.geneontology.org/amigo/term/GO:0030137
branching involved in salivary gland morphogenesis	Gene Ontology	GO:0060445	1	11	0.13602	0.233747	BMP7	http://amigo.geneontology.org/amigo/term/GO:0060445
acetylcholine receptor signaling pathway	Gene Ontology	GO:0095500	1	11	0.13602	0.233747	CHRNA4	http://amigo.geneontology.org/amigo/term/GO:0095500
positive regulation of organ growth	Gene Ontology	GO:0046622	1	11	0.13602	0.233747	YBX3	http://amigo.geneontology.org/amigo/term/GO:0046622
morphogenesis of embryonic epithelium	Gene Ontology	GO:0016331	1	11	0.13602	0.233747	JAG2	http://amigo.geneontology.org/amigo/term/GO:0016331
retinal cone cell development	Gene Ontology	GO:0046549	1	11	0.13602	0.233747	USH1C	http://amigo.geneontology.org/amigo/term/GO:0046549
embryonic morphogenesis	Gene Ontology	GO:0048598	1	11	0.13602	0.233747	MSX1	http://amigo.geneontology.org/amigo/term/GO:0048598
secondary active sulfate transmembrane transporter activity	Gene Ontology	GO:0008271	1	11	0.13602	0.233747	SLC26A9	http://amigo.geneontology.org/amigo/term/GO:0008271
nucleoside monophosphate phosphorylation	Gene Ontology	GO:0046940	1	11	0.13602	0.233747	AK8	http://amigo.geneontology.org/amigo/term/GO:0046940
layer formation in cerebral cortex	Gene Ontology	GO:0021819	1	11	0.13602	0.233747	ADGRG1	http://amigo.geneontology.org/amigo/term/GO:0021819
response to amine	Gene Ontology	GO:0014075	1	11	0.13602	0.233747	ITGA2	http://amigo.geneontology.org/amigo/term/GO:0014075
leukotriene biosynthetic process	Gene Ontology	GO:0019370	1	11	0.13602	0.233747	ALOX5AP	http://amigo.geneontology.org/amigo/term/GO:0019370
endothelial cell differentiation	Gene Ontology	GO:0045446	1	11	0.13602	0.233747	CXCR4	http://amigo.geneontology.org/amigo/term/GO:0045446
receptor localization to synapse	Gene Ontology	GO:0097120	1	11	0.13602	0.233747	DLG3	http://amigo.geneontology.org/amigo/term/GO:0097120
positive regulation of cell cycle G1/S phase transition	Gene Ontology	GO:1902808	1	11	0.13602	0.233747	GLI1	http://amigo.geneontology.org/amigo/term/GO:1902808
inhibitory postsynaptic potential	Gene Ontology	GO:0060080	1	11	0.13602	0.233747	CHRNA4	http://amigo.geneontology.org/amigo/term/GO:0060080
neutral amino acid transmembrane transporter activity	Gene Ontology	GO:0015175	1	11	0.13602	0.233747	SLC1A5	http://amigo.geneontology.org/amigo/term/GO:0015175
cellular response to potassium ion	Gene Ontology	GO:0035865	1	11	0.13602	0.233747	SOD1	http://amigo.geneontology.org/amigo/term/GO:0035865
regulation of cell cycle process	Gene Ontology	GO:0010564	1	11	0.13602	0.233747	HMGA2	http://amigo.geneontology.org/amigo/term/GO:0010564
messenger ribonucleoprotein complex	Gene Ontology	GO:1990124	1	11	0.13602	0.233747	CPEB3	http://amigo.geneontology.org/amigo/term/GO:1990124
dipeptidase activity	Gene Ontology	GO:0016805	1	11	0.13602	0.233747	SCRN1	http://amigo.geneontology.org/amigo/term/GO:0016805
positive regulation of monocyte differentiation	Gene Ontology	GO:0045657	1	11	0.13602	0.233747	FES	http://amigo.geneontology.org/amigo/term/GO:0045657
actin filament depolymerization	Gene Ontology	GO:0030042	1	11	0.13602	0.233747	CFL1	http://amigo.geneontology.org/amigo/term/GO:0030042
sodium:potassium-exchanging ATPase activity	Gene Ontology	GO:0005391	1	11	0.13602	0.233747	ATP1B3	http://amigo.geneontology.org/amigo/term/GO:0005391
Arp2/3 protein complex	Gene Ontology	GO:0005885	1	11	0.13602	0.233747	ARPC1B	http://amigo.geneontology.org/amigo/term/GO:0005885
manganese ion transport	Gene Ontology	GO:0006828	1	11	0.13602	0.233747	SLC11A1	http://amigo.geneontology.org/amigo/term/GO:0006828
positive regulation of production of miRNAs involved in gene silencing by miRNA	Gene Ontology	GO:1903800	1	11	0.13602	0.233747	EGFR	http://amigo.geneontology.org/amigo/term/GO:1903800
mRNA transcription by RNA polymerase II	Gene Ontology	GO:0042789	1	11	0.13602	0.233747	FLNA	http://amigo.geneontology.org/amigo/term/GO:0042789
synaptic vesicle maturation	Gene Ontology	GO:0016188	1	11	0.13602	0.233747	UNC13A	http://amigo.geneontology.org/amigo/term/GO:0016188
regulation of osteoclast differentiation	Gene Ontology	GO:0045670	1	11	0.13602	0.233747	UBASH3B	http://amigo.geneontology.org/amigo/term/GO:0045670
endosome membrane	Gene Ontology	GO:0010008	5	220	0.139012	0.238418	INSR|ADRB2|EGFR|RHOV|FURIN	http://amigo.geneontology.org/amigo/term/GO:0010008
positive regulation of fat cell differentiation	Gene Ontology	GO:0045600	2	52	0.139122	0.238418	ZBTB16|XBP1	http://amigo.geneontology.org/amigo/term/GO:0045600
positive regulation of neuron apoptotic process	Gene Ontology	GO:0043525	2	52	0.139122	0.238418	MYB|MYBL2	http://amigo.geneontology.org/amigo/term/GO:0043525
enzyme activator activity	Gene Ontology	GO:0008047	2	52	0.139122	0.238418	ALOX5AP|PRKCD	http://amigo.geneontology.org/amigo/term/GO:0008047
motile cilium	Gene Ontology	GO:0031514	3	104	0.140656	0.239667	TEKT2|DYNC2H1|CATSPER1	http://amigo.geneontology.org/amigo/term/GO:0031514
peptidyl-serine phosphorylation	Gene Ontology	GO:0018105	4	161	0.141004	0.239667	SRC|DCLK1|PRKCD|STK39	http://amigo.geneontology.org/amigo/term/GO:0018105
growth factor activity	Gene Ontology	GO:0008083	4	162	0.143199	0.239667	BMP7|JAG2|VGF|HDGFL3	http://amigo.geneontology.org/amigo/term/GO:0008083
sensory perception of pain	Gene Ontology	GO:0019233	2	53	0.143274	0.239667	CHRNA4|HOXB8	http://amigo.geneontology.org/amigo/term/GO:0019233
negative regulation of protein ubiquitination	Gene Ontology	GO:0031397	2	53	0.143274	0.239667	HSPA1A|PRR7	http://amigo.geneontology.org/amigo/term/GO:0031397
cellular defense response	Gene Ontology	GO:0006968	2	53	0.143274	0.239667	LSP1|CCR6	http://amigo.geneontology.org/amigo/term/GO:0006968
ER to Golgi transport vesicle membrane	Gene Ontology	GO:0012507	2	53	0.143274	0.239667	SAR1B|SEC16B	http://amigo.geneontology.org/amigo/term/GO:0012507
response to estradiol	Gene Ontology	GO:0032355	3	105	0.143458	0.239667	BMP7|ARPC1B|ASS1	http://amigo.geneontology.org/amigo/term/GO:0032355
positive regulation of acrosome reaction	Gene Ontology	GO:2000344	1	12	0.146485	0.239667	POMZP3	http://amigo.geneontology.org/amigo/term/GO:2000344
urogenital system development	Gene Ontology	GO:0001655	1	12	0.146485	0.239667	EPHB2	http://amigo.geneontology.org/amigo/term/GO:0001655
diacylglycerol binding	Gene Ontology	GO:0019992	1	12	0.146485	0.239667	UNC13A	http://amigo.geneontology.org/amigo/term/GO:0019992
negative regulation of neural precursor cell proliferation	Gene Ontology	GO:2000178	1	12	0.146485	0.239667	SPINT1	http://amigo.geneontology.org/amigo/term/GO:2000178
endoderm formation	Gene Ontology	GO:0001706	1	12	0.146485	0.239667	DUSP4	http://amigo.geneontology.org/amigo/term/GO:0001706
regulation of vascular permeability	Gene Ontology	GO:0043114	1	12	0.146485	0.239667	SRC	http://amigo.geneontology.org/amigo/term/GO:0043114
signal peptide processing	Gene Ontology	GO:0006465	1	12	0.146485	0.239667	FURIN	http://amigo.geneontology.org/amigo/term/GO:0006465
phosphate ion binding	Gene Ontology	GO:0042301	1	12	0.146485	0.239667	MTHFD2	http://amigo.geneontology.org/amigo/term/GO:0042301
hemidesmosome assembly	Gene Ontology	GO:0031581	1	12	0.146485	0.239667	ITGB4	http://amigo.geneontology.org/amigo/term/GO:0031581
cell proliferation in forebrain	Gene Ontology	GO:0021846	1	12	0.146485	0.239667	DISC1	http://amigo.geneontology.org/amigo/term/GO:0021846
positive regulation of phagocytosis, engulfment	Gene Ontology	GO:0060100	1	12	0.146485	0.239667	ITGA2	http://amigo.geneontology.org/amigo/term/GO:0060100
dermatan sulfate biosynthetic process	Gene Ontology	GO:0030208	1	12	0.146485	0.239667	VCAN	http://amigo.geneontology.org/amigo/term/GO:0030208
protein localization to phagophore assembly site	Gene Ontology	GO:0034497	1	12	0.146485	0.239667	ATG9B	http://amigo.geneontology.org/amigo/term/GO:0034497
potassium ion binding	Gene Ontology	GO:0030955	1	12	0.146485	0.239667	PKM	http://amigo.geneontology.org/amigo/term/GO:0030955
response to muramyl dipeptide	Gene Ontology	GO:0032495	1	12	0.146485	0.239667	INAVA	http://amigo.geneontology.org/amigo/term/GO:0032495
neutrophil activation	Gene Ontology	GO:0042119	1	12	0.146485	0.239667	PRKCD	http://amigo.geneontology.org/amigo/term/GO:0042119
hormone binding	Gene Ontology	GO:0042562	1	12	0.146485	0.239667	UTS2	http://amigo.geneontology.org/amigo/term/GO:0042562
positive regulation of mRNA catabolic process	Gene Ontology	GO:0061014	1	12	0.146485	0.239667	PRR5L	http://amigo.geneontology.org/amigo/term/GO:0061014
positive regulation of DNA damage response, signal transduction by p53 class mediator	Gene Ontology	GO:0043517	1	12	0.146485	0.239667	MSX1	http://amigo.geneontology.org/amigo/term/GO:0043517
commissural neuron axon guidance	Gene Ontology	GO:0071679	1	12	0.146485	0.239667	EPHB2	http://amigo.geneontology.org/amigo/term/GO:0071679
response to copper ion	Gene Ontology	GO:0046688	1	12	0.146485	0.239667	SOD1	http://amigo.geneontology.org/amigo/term/GO:0046688
neurotransmitter biosynthetic process	Gene Ontology	GO:0042136	1	12	0.146485	0.239667	GAD1	http://amigo.geneontology.org/amigo/term/GO:0042136
organic anion transmembrane transporter activity	Gene Ontology	GO:0008514	1	12	0.146485	0.239667	MFSD10	http://amigo.geneontology.org/amigo/term/GO:0008514
Ral GTPase binding	Gene Ontology	GO:0017160	1	12	0.146485	0.239667	FLNA	http://amigo.geneontology.org/amigo/term/GO:0017160
placenta blood vessel development	Gene Ontology	GO:0060674	1	12	0.146485	0.239667	SPINT1	http://amigo.geneontology.org/amigo/term/GO:0060674
positive regulation of ceramide biosynthetic process	Gene Ontology	GO:2000304	1	12	0.146485	0.239667	PRKCD	http://amigo.geneontology.org/amigo/term/GO:2000304
positive regulation of interleukin-13 production	Gene Ontology	GO:0032736	1	12	0.146485	0.239667	LGALS9	http://amigo.geneontology.org/amigo/term/GO:0032736
lens fiber cell differentiation	Gene Ontology	GO:0070306	1	12	0.146485	0.239667	SLC7A11	http://amigo.geneontology.org/amigo/term/GO:0070306
regulation of cellular senescence	Gene Ontology	GO:2000772	1	12	0.146485	0.239667	ARNTL	http://amigo.geneontology.org/amigo/term/GO:2000772
fructose 6-phosphate metabolic process	Gene Ontology	GO:0006002	1	12	0.146485	0.239667	PFKP	http://amigo.geneontology.org/amigo/term/GO:0006002
caspase binding	Gene Ontology	GO:0089720	1	12	0.146485	0.239667	RIPK2	http://amigo.geneontology.org/amigo/term/GO:0089720
lysine catabolic process	Gene Ontology	GO:0006554	1	12	0.146485	0.239667	ALDH7A1	http://amigo.geneontology.org/amigo/term/GO:0006554
gamma-catenin binding	Gene Ontology	GO:0045295	1	12	0.146485	0.239667	PTPRT	http://amigo.geneontology.org/amigo/term/GO:0045295
G protein-coupled purinergic nucleotide receptor activity	Gene Ontology	GO:0045028	1	12	0.146485	0.239667	PTAFR	http://amigo.geneontology.org/amigo/term/GO:0045028
regulation of telomere maintenance	Gene Ontology	GO:0032204	1	12	0.146485	0.239667	MYC	http://amigo.geneontology.org/amigo/term/GO:0032204
retinol binding	Gene Ontology	GO:0019841	1	12	0.146485	0.239667	CRABP2	http://amigo.geneontology.org/amigo/term/GO:0019841
cellular response to vitamin D	Gene Ontology	GO:0071305	1	12	0.146485	0.239667	FES	http://amigo.geneontology.org/amigo/term/GO:0071305
seminiferous tubule development	Gene Ontology	GO:0072520	1	12	0.146485	0.239667	ADGRG1	http://amigo.geneontology.org/amigo/term/GO:0072520
regulation of postsynaptic density assembly	Gene Ontology	GO:0099151	1	12	0.146485	0.239667	LRFN4	http://amigo.geneontology.org/amigo/term/GO:0099151
regulation of postsynaptic neurotransmitter receptor internalization	Gene Ontology	GO:0099149	1	12	0.146485	0.239667	EFNB2	http://amigo.geneontology.org/amigo/term/GO:0099149
presynaptic active zone membrane	Gene Ontology	GO:0048787	1	12	0.146485	0.239667	STX1A	http://amigo.geneontology.org/amigo/term/GO:0048787
striatum development	Gene Ontology	GO:0021756	1	12	0.146485	0.239667	SLC7A11	http://amigo.geneontology.org/amigo/term/GO:0021756
diet induced thermogenesis	Gene Ontology	GO:0002024	1	12	0.146485	0.239667	ADRB2	http://amigo.geneontology.org/amigo/term/GO:0002024
L-glutamate transmembrane transporter activity	Gene Ontology	GO:0005313	1	12	0.146485	0.239667	SLC1A7	http://amigo.geneontology.org/amigo/term/GO:0005313
semaphorin receptor activity	Gene Ontology	GO:0017154	1	12	0.146485	0.239667	NELL2	http://amigo.geneontology.org/amigo/term/GO:0017154
collagen-activated tyrosine kinase receptor signaling pathway	Gene Ontology	GO:0038063	1	12	0.146485	0.239667	UBASH3B	http://amigo.geneontology.org/amigo/term/GO:0038063
regulation of smooth muscle contraction	Gene Ontology	GO:0006940	1	12	0.146485	0.239667	TNNI3	http://amigo.geneontology.org/amigo/term/GO:0006940
regulation of proteolysis	Gene Ontology	GO:0030162	1	12	0.146485	0.239667	PLAUR	http://amigo.geneontology.org/amigo/term/GO:0030162
positive regulation of keratinocyte migration	Gene Ontology	GO:0051549	1	12	0.146485	0.239667	MMP9	http://amigo.geneontology.org/amigo/term/GO:0051549
translation repressor activity	Gene Ontology	GO:0030371	1	12	0.146485	0.239667	EIF4EBP2	http://amigo.geneontology.org/amigo/term/GO:0030371
[truncated: 1,117 more rows]
